# Supplementary material for: Testing a newly developed activity pacing framework for chronic pain/fatigue: a feasibility study
Source: PubMed Central journal article supplement — BMJ Open. 2021 Dec 8;11(12):e045398. doi: 10.1136/bmjopen-2020-045398 (PMC8655535; doi:10.1136/bmjopen-2020-045398), 2021-12-08
Supplement: bmjopen-2020-045398.draft_revisions.pdf [file bmjopen-2020-045398.draft_revisions.pdf]

# BMJ Open

BMJ Open is committed to open peer review. As part of this commitment we make the peer review history of every article we publish publicly available.

When an article is published we post the peer reviewers' comments and the authors' responses online. We also post the versions of the paper that were used during peer review. These are the versions that the peer review comments apply to.

The versions of the paper that follow are the versions that were submitted during the peer review process. They are not the versions of record or the final published versions. They should not be cited or distributed as the published version of this manuscript.

BMJ Open is an open access journal and the full, final, typeset and author-corrected version of record of the manuscript is available on our site with no access controls, subscription charges or pay-per-view fees (<http://bmjopen.bmj.com>).

If you have any questions on BMJ Open's open peer review process please email [info.bmjopen@bmj.com](mailto:info.bmjopen@bmj.com)

# BMJ Open

## Testing a newly developed activity pacing framework for chronic pain/fatigue: a feasibility study

|                               |                                                                                                                                                                                                                                                                                                                                                                                                                                                                                                                                                                 |
|-------------------------------|-----------------------------------------------------------------------------------------------------------------------------------------------------------------------------------------------------------------------------------------------------------------------------------------------------------------------------------------------------------------------------------------------------------------------------------------------------------------------------------------------------------------------------------------------------------------|
| Journal:                      | <i>BMJ Open</i>                                                                                                                                                                                                                                                                                                                                                                                                                                                                                                                                                 |
| Manuscript ID                 | bmjopen-2020-045398                                                                                                                                                                                                                                                                                                                                                                                                                                                                                                                                             |
| Article Type:                 | Original research                                                                                                                                                                                                                                                                                                                                                                                                                                                                                                                                               |
| Date Submitted by the Author: | 29-Sep-2020                                                                                                                                                                                                                                                                                                                                                                                                                                                                                                                                                     |
| Complete List of Authors:     | Antcliff, Deborah; Bury and Rochdale Care Organisation, Northern Care Alliance NHS Group, Physiotherapy Department; University of Leeds Faculty of Medicine and Health, School of Healthcare<br>Keenan, Anne-Maree; University of Leeds, School of Healthcare, University of Leeds<br>Keeley, Philip; Keele University School of Nursing and Midwifery<br>Woby, Steve ; Salford Royal NHS Foundation Trust, Research and Innovation Department; University of Salford School of Health and Society<br>McGowan, Linda; University of Leeds, School of Healthcare |
| Keywords:                     | PAIN MANAGEMENT, REHABILITATION MEDICINE, Musculoskeletal disorders < ORTHOPAEDIC & TRAUMA SURGERY                                                                                                                                                                                                                                                                                                                                                                                                                                                              |
|                               |                                                                                                                                                                                                                                                                                                                                                                                                                                                                                                                                                                 |

SCHOLARONE™  
Manuscripts

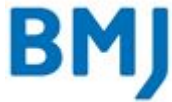

I, the Submitting Author has the right to grant and does grant on behalf of all authors of the Work (as defined in the below author licence), an exclusive licence and/or a non-exclusive licence for contributions from authors who are: i) UK Crown employees; ii) where BMJ has agreed a CC-BY licence shall apply, and/or iii) in accordance with the terms applicable for US Federal Government officers or employees acting as part of their official duties; on a worldwide, perpetual, irrevocable, royalty-free basis to BMJ Publishing Group Ltd ("BMJ") its licensees and where the relevant Journal is co-owned by BMJ to the co-owners of the Journal, to publish the Work in this journal and any other BMJ products and to exploit all rights, as set out in our [licence](#).

The Submitting Author accepts and understands that any supply made under these terms is made by BMJ to the Submitting Author unless you are acting as an employee on behalf of your employer or a postgraduate student of an affiliated institution which is paying any applicable article publishing charge ("APC") for Open Access articles. Where the Submitting Author wishes to make the Work available on an Open Access basis (and intends to pay the relevant APC), the terms of reuse of such Open Access shall be governed by a Creative Commons licence – details of these licences and which [Creative Commons](#) licence will apply to this Work are set out in our licence referred to above.

Other than as permitted in any relevant BMJ Author's Self Archiving Policies, I confirm this Work has not been accepted for publication elsewhere, is not being considered for publication elsewhere and does not duplicate material already published. I confirm all authors consent to publication of this Work and authorise the granting of this licence.

1  
2  
3 **Title: Testing a newly developed activity pacing framework for chronic**  
4 **pain/fatigue: a feasibility study**  
5  
6  
7  
8  
9

10 **AUTHORS**  
11

12 Dr Deborah Antcliff (PhD)<sup>a,b</sup>  
13

14 <sup>a</sup>Physiotherapy Department, Bury and Rochdale Care Organisation, Northern Care  
15 Alliance NHS Group, Bury, United Kingdom.  
16

17 <sup>b</sup>School of Healthcare, University of Leeds, Leeds, United Kingdom.  
18

19  
20  
21  
22  
23 Professor Anne-Maree Keenan (PhD)<sup>b</sup>  
24

25 <sup>b</sup>School of Healthcare, University of Leeds, Leeds, United Kingdom  
26  
27  
28  
29

30 Professor Philip Keeley (PhD)<sup>c</sup>  
31

32 <sup>c</sup>School of Nursing and Midwifery, Keele University, Keele, United Kingdom  
33  
34  
35  
36

37 Professor Steve Woby (PhD)<sup>d,e,f</sup>  
38

39 <sup>d</sup>Research and Innovation Department, Northern Care Alliance NHS Group, Salford,  
40 United Kingdom.  
41  
42

43 <sup>e</sup>School of Health and Society, University of Salford, Salford, United Kingdom.  
44

45 <sup>f</sup>Faculty of Science and Engineering, Manchester Metropolitan University,  
46 Manchester, United Kingdom.  
47  
48

49 Steve.Woby@srft.nhs.uk  
50  
51  
52  
53

54 Professor Linda McGowan (PhD)<sup>b</sup>  
55

56 <sup>b</sup>School of Healthcare, University of Leeds, Leeds, United Kingdom  
57  
58  
59  
60

**CORRESPONDING AUTHOR**

Dr Deborah Antcliff (PhD)

Physiotherapy Department

Fairfield General Hospital

Bury and Rochdale Care Organisation

Northern Care Alliance NHS Group

Rochdale Old Road

Bury, England

BL9 7TD

United Kingdom

[Deborah.Antcliff@pat.nhs.uk](mailto:Deborah.Antcliff@pat.nhs.uk)

Tel: +44 (0)7769683646

Fax: Nil available

ORCID ID: 0000-0002-9771-8232

Institutional URL: <http://www.leeds.ac.uk/>

Word count: 4,122 words

**KEY WORDS**

Pain management; Rehabilitation medicine, Musculoskeletal disorders

## ABSTRACT

**Objectives:** To test the feasibility of using a new activity pacing framework to standardise healthcare professionals' instructions of pacing, and explore whether measures of pacing/symptoms detected changes following treatment.

**Design:** Single-arm, repeated measures study.

**Setting:** A single NHS Pain Service in Northern England, U.K.

**Participants:** Adult patients with chronic pain/fatigue, including chronic low back pain, chronic widespread pain, fibromyalgia and chronic fatigue syndrome/myalgic encephalomyelitis.

**Interventions:** Six-week rehabilitation programme, standardised using the activity pacing framework.

**Outcome measures:** Feasibility was explored via patients' recruitment/attrition rates, adherence and satisfaction, and healthcare professionals' fidelity.

Questionnaire data were collected from patients at the start and end of the six-week programme (T1/T2) and three months' follow-up (T3). Questionnaires included measures of activity pacing, current/usual pain, physical/mental fatigue, depression, anxiety, self-efficacy, avoidance, physical/mental function and quality of life. Mean changes and relationships between pacing and symptoms (T1-T2/T1-T3) were estimated.

**Results:** Of the 139 eligible patients, 107 patients consented (recruitment rate=77%); 65 patients completed T2 (T1-T2 attrition rate=39%), and 52 patients completed T3 (T1-T3 attrition rate=51%). At T2, patients' satisfaction ratings averaged 9/10, and 89% attended  $\geq 5$  sessions. Activity pacing and all symptoms improved between T1-T2, with smaller improvements maintained at T3. Between T1-

1  
2  
3 T2, changes in pacing significantly correlated with current pain ( $r_s=-0.29$ ,  $p=0.019$ ),  
4 self-efficacy ( $r_s=0.26-0.39$ ,  $p<0.05$ ) and mental function ( $r_s=0.27-0.28$ ,  $p<0.05$ ).  
5  
6

7  
8 Between T1-T3, there were additional significant correlations between changes in  
9  
10 pacing and physical/mental fatigue, depression, anxiety and quality of life ( $p<0.05$ ).  
11

12 There were no significant correlations with physical function/avoidance.  
13

14 **Conclusion:** The activity pacing framework was feasible to implement and patients'  
15 ability to pace and manage their symptoms improved. Future work will employ a  
16 suitable comparison group and test the framework across wider settings to explore  
17 the effects of activity pacing in a randomised controlled trial.  
18  
19  
20  
21  
22

23 **Trial registration:** ClinicalTrials.gov:NCT03497585  
24

25 **Funding:** Health Education England/National Institute for Health Research  
26  
27  
28  
29

### 30 **STRENGTHS AND LIMITATIONS OF THIS STUDY**

31  
32  
33  
34

- 35 • This was the first study to test the feasibility of using a newly developed  
36 activity pacing framework in a rehabilitation programme to standardise the  
37 clinical instructions of activity pacing to patients with chronic pain/fatigue.  
38  
39
- 40 • This feasibility study recruited to target with satisfactory recruitment/attrition  
41 rates which form the basis of a future RCT.  
42  
43
- 44 • A comprehensive measure of pacing: the activity pacing questionnaire (APQ-  
45 28), and range of validated psychometric measures were suitable to detect  
46 changes before and after treatment.  
47  
48
- 49 • This study was not powered with a control arm to determine treatment  
50 effectiveness, and the exploratory statistical analyses do not indicate  
51 causation between increased activity pacing and improved symptoms.  
52  
53  
54  
55  
56  
57  
58  
59  
60

- The generalisability of this study is limited to a sample of predominantly females, of white ethnic origin, and from a single Pain Service.

## INTRODUCTION

Activity pacing is a principal coping strategy for patients with long-term conditions, including chronic low back pain, chronic widespread pain, fibromyalgia and chronic fatigue syndrome/myalgic encephalomyelitis (CFS/ME),[1-5]. Chronic pain and chronic fatigue are known to co-exist,[6, 7] and overlap in symptoms, including depression, anxiety and disability,[8-11]. Conditions of chronic pain/fatigue may share similar disease processes: physical deconditioning following under-activity/avoidance, pathophysiological/psychological processes and central sensitisation,[11-16]. Treatments aim to reverse some of these processes: to improve physical/mental functioning, increase tolerance and improve quality of life,[12, 15, 17]. Recommended treatments include psychological therapies (for example, cognitive behavioural therapy) and graded exposure to activity/exercise,[15, 16]; of which activity pacing is a key component,[18-20].

Patients with chronic pain/fatigue may present with altered behaviours, including underactivity or avoidance of activities that are perceived as harmful or that may exacerbate symptoms; over-activity or excessive persistence to push through/distract from symptoms; or fluctuations between underactivity-overactivity,[21]. Activity pacing provides an alternative behaviour to enable patients to (re-)engage with activities in a manner that encourages their progression towards more regular or improved functioning,[4, 22, 23].



1  
2  
3  
4  
5 At present, there remains confusion regarding how activity pacing is defined or  
6 interpreted, and the effects on patients' symptoms,[5, 24, 25]. There is no widely-  
7  
8 used guide to standardise how healthcare professionals instruct pacing to patients;  
9  
10 and uncertainty whether different methods are required for symptoms of chronic pain  
11  
12 versus chronic fatigue,[3, 26]. This poses challenges how to advise patients with  
13  
14 both chronic pain and fatigue.  
15  
16  
17  
18  
19  
20  
21

22 We have developed an activity pacing framework using an inclusive approach for  
23 patients who present at rehabilitation services with chronic pain and/or fatigue. Using  
24 the Medical Research Council guidelines for developing complex interventions,  
25 mixed methods were implemented to encompass theoretical and stakeholder  
26 standpoints,[27]. Stage I: Healthcare professionals' survey gathered opinions on  
27 activity pacing (n=92),[4]. These findings, together with existing research formed the  
28 first draft of the framework and accompanying appendices. Stage II: Nominal group  
29 technique refined the activity pacing framework using a consensus meeting between  
30 patients and healthcare professionals (n=10),[28].  
31  
32  
33  
34  
35  
36  
37  
38  
39  
40  
41  
42  
43  
44

45 The conceptual model of the activity pacing framework (see *Figure 1*) follows  
46 principles of quota-contingency/operant approach (for example, setting goals  
47 according to time/distance/activity), with a rehabilitative aim of improving  
48 participation in meaningful activities and self-efficacy while managing symptoms,[4,  
49 28]. Quota-contingency is advised alongside concepts of flexibility and choice to  
50 enable relevance and sustainability in conditions where symptoms may vary. The  
51 framework refers to all types of activities including work, household activities,  
52  
53  
54  
55  
56  
57  
58  
59  
60

1  
2  
3 cognitive activities, physical activities, exercise and relaxation to increase its wider  
4  
5 relevance for patients with chronic pain and/or fatigue, for varying abilities and  
6  
7 behaviours.  
8  
9

10  
11  
12 The aim of this study was to test the feasibility of using the activity pacing framework  
13  
14 to underpin a rehabilitation programme for chronic pain/fatigue. To inform a future  
15  
16 definitive trial, specific objectives included: (1) Exploring participant  
17  
18 recruitment/attrition rates and adherence/acceptability (for both chronic pain and  
19  
20 fatigue); (2) Exploring healthcare professionals' fidelity to the framework; (3) Exploring  
21  
22 the suitability of the outcome measures, including the modified activity pacing  
23  
24 questionnaire (APQ-28); and (4) Exploring associations between changes in activity  
25  
26 pacing and self-reported symptoms.  
27  
28  
29  
30  
31  
32

## 33 **METHODS**

### 34 **Study design**

35  
36  
37  
38  
39  
40  
41  
42 This single-arm, repeated measures study is reported as a non-randomised  
43  
44 feasibility study using the extended CONSORT guidelines,[29, 30] (See  
45  
46 *Supplementary Table 1*). Quantitative questionnaire data were collected from  
47  
48 patients at the start (T1) and end (T2) of the six-week rehabilitation programme, and  
49  
50 at three month's follow-up (T3). The study was prospectively registered (protocol  
51  
52 available at ClinicalTrials.gov: NCT03497585). Ethical approval was granted by the  
53  
54 London-Surrey Research Ethics Committee (18/LO/0655). The acceptability  
55  
56 interviews with patients and healthcare professionals will be reported elsewhere.  
57  
58  
59  
60

## Participant recruitment

Participants were identified from consecutive referrals to a rehabilitation programme for chronic pain/fatigue in a Pain Service in Northern England, United Kingdom. All patients attended a minimum of one face-to-face appointment before referral to the programme. Participants received the study information via the post one week before attending the programme and/or during the first session of the programme. The consent form was completed either at home or during the first session.

## Eligibility criteria

Eligible patients were aged  $\geq 18$  years, with symptoms for  $\geq 3$  months and with a general practitioner or hospital consultant diagnosis of chronic low back pain, chronic widespread pain, fibromyalgia or CFS/ME. Patients were required to read and write in English. Ineligible patients were those with evidence of a serious underlying pathology, such as a current diagnosis of cancer, or patients with severe mental health or cognitive functioning issues.

## Sample size

A sample size of 50 patients has been recommended for feasibility studies to enable estimates of recruitment/attrition, means/standard deviations and changes in means to prepare for future clinical trials,[31]. To attain a sample of 50 participants at T3, it was estimated that 340 patients may need to be approached to allow for a 50%

1  
2  
3 recruitment rate at T1, a 40% attrition rate between T1-T2 and a 50% return rate at  
4  
5 T3.  
6  
7  
8  
9

### 10 **Existing rehabilitation programme**

11  
12  
13

14 The existing rehabilitation programme comprised of six consecutive weekly sessions  
15 (each 3.5 hours) delivered by healthcare professionals (pain specialist  
16 physiotherapists and psychological wellbeing practitioners). The programme  
17 included understanding complex symptoms, sleep hygiene, graded exercise, goal  
18 setting, relaxation and mindfulness. Activity pacing was instructed in one session but  
19 was not informed by any particular framework.  
20  
21  
22  
23  
24  
25  
26  
27  
28  
29

### 30 **Activity pacing framework standardised programme**

31  
32  
33

34 The existing six-week programme was modified through re-structuring and  
35 standardisation using the activity pacing framework. Activity pacing was formally  
36 instructed on two sessions (weeks 2-3), but also referenced throughout the  
37 programme in relation to other coping strategies. Practical exercises included  
38 completing an activity diary to discuss patients' activity patterns and setting goals in  
39 which activity pacing could be practised. The healthcare professionals (as above)  
40 received training on the framework during a half-day session and could contact the  
41 lead researcher (DA) for any queries. All patients attended the standardised  
42 programme, but participants chose whether to complete the study questionnaires.  
43  
44  
45  
46  
47  
48  
49  
50  
51  
52  
53  
54  
55  
56  
57  
58  
59  
60

## Data collection

## Feasibility outcomes

Measures of feasibility included participant recruitment/attrition rates, adherence (number of sessions attended), acceptability (two satisfaction rating scales regarding the programme content and length where 0=dissatisfied and 10=fully satisfied), and missing data in the questionnaire. For every programme, healthcare professionals completed a 13-item fidelity checklist based on the conceptual model of the activity pacing framework to ensure their inclusion of key elements from the framework. Each clinician was observed once by the lead researcher.

## Clinical measures

The self-reported questionnaire booklets (T1, T2 and T3) included standardised clinical measures. T1 could be completed during session one or at home, T2 could be completed during session six, and T3 was sent in the post to be completed at home. Telephone reminders were made if the T3 questionnaires were not returned within two weeks. The T1 booklet contained demographic questions, in addition to following measures included in T2 and T3:

(1) Activity pacing was measured using the Activity Pacing Questionnaire (APQ-28).

The APQ 26-item version was initially validated among patients with chronic pain/fatigue and contained five subthemes: Activity adjustment, Activity planning, Activity consistency, Activity acceptance and Activity progression (Cronbach's

1  
2  
3 alpha=0.72-0.92),[32]. Each item is scored between 0='never did this' and 4='always  
4 did this'. Two items have been added that correspond to important aspects of pacing  
5 that emerged during the development of the activity pacing framework. The new  
6 items: APQ12:"I found a baseline amount of activities that I could do on 'good' and  
7 'bad' days" and APQ15:"I had a flexible approach with my activities" were added to  
8 the subthemes of best conceptual fit (Activity adjustment and Activity acceptance  
9 respectively). Each subtheme was calculated as a mean score. The APQ-28  
10 subthemes, similarly to the following scales, permitted one missing item per  
11 subscale.  
12  
13  
14  
15  
16  
17  
18  
19  
20  
21  
22  
23  
24  
25

26 (2) Current and usual pain were measured using two 11-point numerical rating  
27 scales (NRS), where 0='no pain' and 10='worst possible pain',[33].  
28  
29  
30  
31  
32

33 (3) Physical fatigue (seven items) and mental fatigue (four items) were measured  
34 using the Chalder Fatigue Questionnaire (CFQ), where scores of 1='much worse  
35 than usual' and 4='better than usual',[34]. Two subscale scores were summated  
36 where higher scores indicated less fatigue.  
37  
38  
39  
40  
41  
42  
43

44 (4) Depression was measured using the nine item Patient Health Questionnaire  
45 (PHQ-9). Items were rated between 0='not at all' and 3='nearly everyday'. Total  
46 scores of 1-4=minimal depression, 5-9=mild depression, 10-14=moderate  
47 depression and  $\geq 15$ =severe depression,[35, 36].  
48  
49  
50  
51  
52  
53  
54  
55  
56  
57  
58  
59  
60

1  
2  
3 (5) Anxiety was measured using the seven-item Generalised Anxiety Disorder  
4  
5 Assessment (GAD-7). Total scores of 5-9=mild anxiety, 10-14=moderate anxiety and  
6  
7  $\geq 15$ =severe anxiety,[37].  
8  
9

10  
11  
12 (6) Self-efficacy was measured using the 10-item Pain Self-Efficacy Questionnaire  
13  
14 (PSEQ) where items were rated between 0='not at all confident' and 6='completely  
15  
16 confident'. Total scores of  $PSEQ \geq 40$  indicate those patients who are more likely to  
17  
18 continue implementing coping strategies/behavioural changes, and  $PSEQ \leq 16$  are  
19  
20 considered low,[38].  
21  
22  
23

24  
25  
26 (7) Avoidance was measured using the 'Escape and Avoidance' subscale of the Pain  
27  
28 Anxiety Symptoms Scale-short version (PASS-20),[39]. The five items were rated  
29  
30 between 0='never' and 5='always' where higher total scores indicated greater  
31  
32 avoidance.  
33  
34  
35

36  
37  
38 (8) Physical and mental function were measured using the 12-Item Short-Form  
39  
40 Health Survey (SF-12). Two subscale scores (out of 100) were calculated using the  
41  
42 SF-12 software (Version 2; one-week recall) where higher scores indicated better  
43  
44 function,[40].  
45  
46  
47

48  
49 (9) Health-related quality of life was measured using the EQ-5D-5L (EuroQol). The  
50  
51 EQ-5D-5L was calculated as an index score,[41, 42].  
52  
53  
54

## 55 56 **Data analysis** 57 58 59 60

1  
2  
3 Feasibility outcomes and participants' demographics were analysed using  
4  
5 descriptive statistics. Clinical outcomes were estimated as changes in activity pacing  
6  
7 and symptoms between T1-T2, T2-T3 and T1-T3 (mean change, 95% confidence  
8  
9 intervals), and exploratory analyses of correlations between changes in activity  
10  
11 pacing and symptoms (T1-T2/T1-T3). The validity of the modified APQ-28 was  
12  
13 estimated using Cronbach's alpha and item correlations; and sensitivity analyses  
14  
15 explored the effects of including two new APQ items. Data were analysed using IBM  
16  
17 SPSS Statistics 26 statistical software (IBM Corp, Armonk, New York).  
18  
19  
20  
21  
22

### 23 24 **Patient and Public Involvement**

25  
26  
27  
28 Patient and Public Involvement (PPI) commenced during the initial planning stages  
29  
30 of the mixed methods programme to develop and test the activity pacing framework.  
31  
32 A meeting with five PPI representatives discussed the study purpose and practical  
33  
34 issues around the proposed methods (online survey, nominal group technique, and  
35  
36 feasibility and acceptability studies). PPI guided on improving the accessibility of  
37  
38 patients' participation and reducing burden. A PPI representative has acted as an  
39  
40 advisor on the study, involving commenting on study documents/questionnaire  
41  
42 booklets and coding qualitative interviews. Acceptability interviews with patients  
43  
44 explored practical issues surrounding the feasibility study (to be reported elsewhere)  
45  
46  
47 which will further assist the planning of a future activity pacing RCT.  
48  
49  
50  
51  
52

### 53 54 **RESULTS**



Recruitment and T1 data collection commenced in May 2018 and T3 data collection ended in December 2019 due to attaining the target sample.

## Demographics

Among the 107 participants who completed the baseline (T1) measures, participants were predominantly female (n=92, 86.0%) with a mean age of 55.25 +/- 12.83 years. Low back pain was most frequently reported (n=79, 73.8%) and CFS/ME least frequently reported (n=12, 11.2%). Sixty-five participants (61.3%) reported two or more conditions of chronic pain and/or fatigue. Of the 12 participants with CFS/ME, 10 participants reported CFS/ME as their main condition, and 11 reported at least one co-morbidity of LBP (n=7), chronic widespread pain (n=6), fibromyalgia (n=7) or another condition (n=3). (See Table 1 for participant demographics and Table 2 for baseline scores for activity pacing and symptoms.)

**Table 1. Participant demographics at baseline (T1)**

|                    | Participants who completed T1 but not T2 | Participants who completed T1 and T2 | Total      |
|--------------------|------------------------------------------|--------------------------------------|------------|
| <b>Gender</b>      | (n=42)                                   | (n=65)                               | (n=107)    |
| Male               | 6 (14.3%)                                | 9 (13.8%)                            | 15 (14.0%) |
| Female             | 36 (85.7%)                               | 56 (86.2%)                           | 92 (86.0%) |
| <b>Age (years)</b> | (n=41)                                   | (n=65)                               | (n=106)    |
|                    | Mean=56.07                               | Mean=54.74                           | Mean=55.25 |
|                    | (SD=13.85)                               | (SD=12.22)                           | (SD=12.83) |

|                                                           |            |            |            |
|-----------------------------------------------------------|------------|------------|------------|
| <b>Ethnicity</b>                                          | (n=41)     | (n=65)     | (n=106)    |
| White (British, Irish, Other)                             | 39 (92.9%) | 60 (92.3%) | 99 (93.4%) |
| Black (Caribbean, African)                                | 0 (0.0%)   | 1 (1.5%)   | 1 (0.9%)   |
| Mixed (white/black, white/Asian, other)                   | 1 (2.4%)   | 2 (3.1%)   | 3 (2.8%)   |
| Asian (Indian, Pakistani, Bangladeshi, other)             | 1 (2.4%)   | 2 (3.1%)   | 3 (2.8%)   |
| Asian Eastern (Chinese, other)                            | 0 (0.0%)   | 0 (0.0%)   | 0 (0.0%)   |
| <b>Living situation*</b>                                  | (n=42)     | (n=65)     | (n=107)    |
| Lives alone                                               | 7 (16.7%)  | 10 (15.4%) | 17 (15.9%) |
| Lives with partner                                        | 25 (59.5%) | 48 (73.8%) | 73 (68.2%) |
| Lives with children                                       | 16 (38.1%) | 24 (36.9%) | 40 (37.4%) |
| Other                                                     | 2 (4.8%)   | 1 (1.5%)   | 3 (2.8%)   |
| <b>Employment</b>                                         | (n=42)     | (n=65)     | (n=107)    |
| Working (full-time, part-time, in the house, student)     | 13 (31.0%) | 31 (47.7%) | 44 (41.1%) |
| Not working (due to chronic pain/fatigue/other condition) | 15 (35.7%) | 19 (29.2%) | 34 (31.8%) |
| Retired/semi-retired                                      | 14 (33.3%) | 14 (21.5%) | 28 (26.2%) |
| Other                                                     | 0 (0.0%)   | 1 (1.5%)   | 1 (0.9%)   |

|                                                                 |                         |                          |                          |
|-----------------------------------------------------------------|-------------------------|--------------------------|--------------------------|
| <b>Conditions*:</b>                                             | (n=41)                  | (n=65)                   | (n=106)                  |
| Low back pain                                                   | 30 (71.4%)              | 49 (75.4%)               | 79 (73.8%)               |
| Widespread pain                                                 | 19 (45.2%)              | 33 (50.8%)               | 52 (48.6%)               |
| Fibromyalgia                                                    | 9 (21.4%)               | 20 (30.8%)               | 29 (27.1%)               |
| CFS/ME                                                          | 6 (14.3%)               | 6 (9.2%)                 | 12 (11.2%)               |
| Other                                                           | 9 (21.4%)               | 12 (18.5%)               | 21 (19.6%)               |
| <b>Number of the above conditions (multiple comorbidities):</b> | (n=41)                  | (n=65)                   | (n=106)                  |
| 1                                                               | 17 (40.5%)              | 24 (36.9%)               | 41 (38.7%)               |
| 2                                                               | 19 (45.2%)              | 30 (46.2%)               | 49 (46.2%)               |
| 3                                                               | 3 (7.1%)                | 9 (13.8%)                | 12 (11.2%)               |
| 4                                                               | 1 (2.4%)                | 1 (1.5%)                 | 2 (1.9%)                 |
| 5                                                               | 1 (2.4%)                | 1 (1.5%)                 | 2 (1.9%)                 |
| <b>Duration of participants' main condition (years)</b>         | (n=35)                  | (n=61)                   | (n=96)                   |
|                                                                 | Mean=10.23<br>(SD=9.49) | Mean=12.94<br>(SD=11.36) | Mean=11.95<br>(SD=10.74) |

\*Patients could select more than one answer.

**Table 2. Baseline scores for activity pacing and symptoms for all patients completing the baseline questionnaires (T1)**

| <b>Measures</b>             | <b>Baseline scores<br/>for those<br/>completed T1<br/>but not T2:<br/>Mean (SD)</b> | <b>Baseline scores<br/>for those<br/>completed T1<br/>and T2:<br/>Mean (SD)</b> | <b>Total scores</b>     |
|-----------------------------|-------------------------------------------------------------------------------------|---------------------------------------------------------------------------------|-------------------------|
| APQ-28 Activity adjustment  | (n=42)<br>1.96 (0.87)                                                               | (n=64)<br>1.74 (0.76)                                                           | (n=106)<br>1.83 (0.81)  |
| APQ-28 Activity planning    | (n=42)<br>1.57 (1.03)                                                               | (n=65)<br>1.44 (0.95)                                                           | (n=107)<br>1.49 (0.98)  |
| APQ-28 Activity consistency | (n=42)<br>1.91 (0.91)                                                               | (n=65)<br>1.82 (0.96)                                                           | (n=107)<br>1.85 (0.94)  |
| APQ-28 Activity acceptance  | (n=42)<br>1.97 (1.02)                                                               | (n=65)<br>1.87 (0.84)                                                           | (n=107)<br>1.91 (0.92)  |
| APQ-28 Activity progression | (n=42)<br>1.59 (1.05)                                                               | (n=65)<br>1.45 (0.88)                                                           | (n=107)<br>1.51 (0.95)  |
| Current pain                | (n=41)<br>6.83 (1.96)                                                               | (n=65)<br>6.63 (1.97)                                                           | (n=106)<br>6.71 (1.96)  |
| Usual pain                  | (n=40)<br>7.72 (1.43)                                                               | (n=63)<br>7.30 (1.82)                                                           | (n=103)<br>7.47 (1.69)  |
| Physical fatigue            | (n=41)<br>14.18 (5.12)                                                              | (n=62)<br>15.22 (4.10)                                                          | (n=103)<br>14.81 (4.54) |
| Mental fatigue              | (n=42)<br>8.79 (3.22)                                                               | (n=64)<br>8.86 (2.77)                                                           | (n=106)<br>8.83 (2.94)  |

|                   |                         |                         |                          |
|-------------------|-------------------------|-------------------------|--------------------------|
| Depression        | (n=40)<br>12.63 (7.61)  | (n=64)<br>13.66 (6.38)  | (n=104)<br>13.26 (6.86)  |
| Anxiety           | (n=41)<br>9.86 (6.64)   | (n=65)<br>9.91 (5.47)   | (n=106)<br>9.89 (5.92)   |
| Self-efficacy     | (n=42)<br>26.26 (13.85) | (n=65)<br>25.29 (10.60) | (n=107)<br>25.67 (11.93) |
| Avoidance         | (n=42)<br>12.95 (6.74)  | (n=64)<br>13.27 (5.49)  | (n=106)<br>13.14 (5.98)  |
| Physical function | (n=42)<br>33.67 (9.75)  | (n=63)<br>34.15 (8.23)  | (n=105)<br>33.96 (8.82)  |
| Mental function   | (n=42)<br>42.22 (11.51) | (n=63)<br>38.52 (11.10) | (n=105)<br>40.00 (11.36) |
| Quality of life   | (n=40)<br>0.41 (0.26)   | (n=60)<br>0.43 (0.25)   | (n=100)<br>0.42 (0.25)   |

*Activity pacing (Activity Pacing Questionnaire-28, APQ-28), Pain (Numerical Rating Scale 0-10), Physical/mental fatigue (Chalder Fatigue Questionnaire), Depression (Patient Health Questionnaire-9), Anxiety (Generalised Anxiety Disorder-7), Self-efficacy (Pain Self-Efficacy Questionnaire), Avoidance (Escape and avoidance subscale of the Pain Anxiety Symptoms Scale-20) Physical/mental function (Short-Form 12), Quality of life (EQ-5D-5L index score)*

## **Feasibility outcomes**

### **Recruitment and attrition (Objective 1)**

1  
2  
3 Of the 144 patients invited to participate, 139 were eligible (96.5%). The reasons for  
4 ineligibility included: three patients reported only neck pain, one patient reported  
5 neck/knee pain and one patient reported thoracic pain. Of the 139 eligible patients,  
6 107 (77.0%) were recruited at T1, 69 (64.5%) completed the six-week programme  
7 and 65 (60.7%) completed the T2 measures (attrition rate=39.3%). Fifty-two  
8 participants completed T3 (80.0% of T2; attrition rate from T1=51.4%). There were  
9 no serious adverse events. (See *Figure 2. CONSORT flow diagram.*)  
10  
11  
12  
13  
14  
15  
16  
17  
18  
19  
20

21 Of the 107 participants, the median number of rehabilitation programme sessions  
22 attended was five (58.9% participants attended  $\geq 5$  sessions); 83.2% participants  
23 attended at least one activity pacing session and 56.1% attended both pacing  
24 sessions. Of the 65 participants who completed T2, the median number of sessions  
25 attended was six (89.2% participants attended  $\geq 5$  sessions); 100% of participants  
26 attended at least one pacing specific session and 54 (83.1%) participants attended  
27 both pacing sessions. There were no statistically significant differences between  
28 participants who completed T2 or dropped out in terms of demographics or baseline  
29 symptoms. Of the 12 participants with CFS/ME, six completed T2 (50%) and six  
30 completed T3 (100% of T2, 50% of T1); whereas 59 of the 95 participants without  
31 CFS/ME completed T2 (62%) and 46 completed T3 (78% of T2 and 48% of T1).  
32  
33  
34  
35  
36  
37  
38  
39  
40  
41  
42  
43  
44  
45  
46  
47  
48

### 49 **Acceptability of the rehabilitation programme/questionnaires (Objective 1)**

50  
51  
52  
53 On T2, participants rated their satisfaction of the length and content of the  
54 rehabilitation programme as mean=8.8 (SD=1.7) and 9.1 (SD=1.5) respectively. The  
55  
56  
57  
58  
59  
60

1  
2  
3 satisfaction of only those participants with CFS/ME was mean=9.0 (SD=0.9) and 9.2  
4  
5 (SD=1.0).  
6  
7  
8  
9

10 There were minimal missing data in the questionnaire booklets (approximately 1%).

11  
12 Some participants wrote comments regarding their perceived benefits of  
13  
14 implementing activity pacing and other coping strategies. Two participants wished for  
15  
16 a longer programme or a follow-up session (*see Figure 3 for examples of*  
17  
18 *participants' comments*).  
19  
20  
21  
22  
23

### 24 **Fidelity to the activity pacing framework (Objective 2)**

25  
26  
27  
28 Each healthcare professional observation demonstrated good adherence to the  
29  
30 framework against a number of key points. Healthcare professionals reported 100%  
31  
32 adherence in their fidelity checklists for each rehabilitation programme. Healthcare  
33  
34 professionals reported that some participants spent over 20 minutes completing the  
35  
36 questionnaire booklet, and that not all patients completed the activity diaries.  
37  
38  
39  
40  
41

### 42 **Interventions between T2 and T3**

43  
44  
45  
46 Of the 52 respondents at T3, two patients received lumbar epidural steroid injections,  
47  
48 one patient had acupuncture, one attended a chiropractor and one patient had knee  
49  
50 surgery.  
51  
52  
53  
54  
55

### 56 **Clinical outcomes**

### Validity of the modified APQ-28 (Objective 3)

At T1, the two new APQ-28 items showed ease of completion through minimal missing answers (Item APQ12=0 missing answers, Item APQ15=1 missing answer).

The scores of the new items utilised the full range, and the mean scores (Items APQ12=1.67 and APQ15=1.91) sat within the range of the other APQ-28 items (mean=1.17-2.78). The new items demonstrated optimal fit with their allocated subthemes via highest inter-item correlations and item-total correlations (Item total correlations: APQ12 and Activity adjustment,  $r_s(106)=0.76$ ,  $p<0.001$ ; Item APQ15 and Activity acceptance,  $r(106)=0.68$ ,  $p<0.001$ ). The internal consistency for Activity adjustment increased with the addition of Item APQ12 (Cronbach's alpha=0.86 to 0.88), and for Activity acceptance with the addition of Item APQ15 (Cronbach's alpha=0.68 to 0.72). The internal validity of the other APQ-28 subthemes were: Activity planning=0.86, Activity consistency=0.80 and Activity progression=0.69.

### Mean changes in activity pacing and symptoms (Objective 3)

Between T1-T2, all five APQ-28 subtheme mean scores increased, indicating improved activity pacing. There were small reductions in APQ-28 scores between T2-T3. However, all five subthemes showed overall improvements between T1-T3, with Activity planning showing the greatest increases (see *Table 3*). Sensitivity analyses showed marginal increases in mean changes following the addition of the new APQ-28 items.



1  
2  
3 Between T1-T2, the mean scores of all symptoms improved. Current pain reduced  
4 more than usual pain. Physical and mental fatigue both improved, as did self-efficacy  
5 and quality of life. Mental function improved more than physical function. Depression,  
6 anxiety and avoidance all reduced. There was some deterioration in symptoms  
7  
8 between T2-T3, but between T1-T3 all symptoms demonstrated clear improvements  
9  
10 except avoidance (-1.46, 95% CI=-3.02 to 0.10) and physical function (1.62, 95%  
11  
12 CI=-0.81 to 4.06) (see *Table 3.*). Observing only the subgroup of participants with  
13  
14 CFS/ME, improvements were seen between T1-T2 and T1-T3 across all APQ-28  
15  
16 subthemes and symptoms.  
17  
18  
19  
20  
21  
22  
23  
24  
25  
26  
27  
28  
29  
30  
31  
32  
33  
34  
35  
36  
37  
38  
39  
40  
41  
42  
43  
44  
45  
46  
47  
48  
49  
50  
51  
52  
53  
54  
55  
56  
57  
58  
59  
60

**Table 3. Mean change in the five subthemes of activity pacing (APQ-28) and all measures of symptoms between T1 (baseline), T2 (end of 6-weeks' treatment) and T3 (3-months' follow-up)**

|                                   | T1 mean (SD)<br>T2 mean (SD)                       | T2-T1 mean<br>change (95%<br>confidence<br>interval) | T2 mean (SD)<br>T3 mean (SD)                       | T3-T2 mean<br>change (95%<br>confidence<br>interval) | T3 mean<br>T1 mean                                 | T3-T1 mean<br>change (95%<br>confidence<br>interval) |
|-----------------------------------|----------------------------------------------------|------------------------------------------------------|----------------------------------------------------|------------------------------------------------------|----------------------------------------------------|------------------------------------------------------|
| APQ-28<br>Activity<br>adjustment  | (n=63)<br>T1 mean=1.73(0.77)<br>T2 mean=2.43(0.73) | 0.70 (95% CI=<br>0.48 to 0.91)                       | (n=51)<br>T2 mean=2.44(0.72)<br>T3 mean=2.32(0.90) | -0.12 (95% CI=<br>-0.36 to 0.11)                     | (n=50)<br>T1 mean=1.75(0.78)<br>T3 mean=2.33(0.90) | 0.58 (95% CI=<br>0.33 to 0.83)                       |
| APQ-28<br>Activity<br>planning    | (n=65)<br>T1 mean=1.44(0.95)<br>T2 mean=2.42(0.87) | 0.99 (95% CI=<br>0.72 to 1.26)                       | (n=52)<br>T2 mean=2.45(0.87)<br>T3 mean=2.06(1.02) | -0.39 (95% CI=<br>-0.70 to -0.07)                    | (n=52)<br>T1 mean=1.42(0.96)<br>T3 mean=2.06(1.02) | 0.64 (95% CI=<br>0.36 to 0.92)                       |
| APQ-28<br>Activity<br>consistency | (n=65)<br>T1 mean=1.82(0.96)<br>T2 mean=2.65(0.74) | 0.84 (95% CI=<br>0.60 to 1.07)                       | (n=52)<br>T2 mean=2.66(0.71)<br>T3 mean=2.37(0.72) | -0.29 (95% CI=<br>-0.54 to -0.04)                    | (n=52)<br>T1 mean=1.86(1.00)<br>T3 mean=2.37(0.72) | 0.51 (95% CI=<br>0.24 to 0.78)                       |

|                                   |                                                        |                                   |                                                      |                                   |                                                      |                                   |
|-----------------------------------|--------------------------------------------------------|-----------------------------------|------------------------------------------------------|-----------------------------------|------------------------------------------------------|-----------------------------------|
| APQ-28<br>Activity<br>acceptance  | (n=65)<br>T1 mean=1.87(0.84)<br>T2 mean=2.55(0.72)     | 0.67 (95% CI=<br>0.46 to 0.89)    | (n=52)<br>T2 mean=2.57(0.73)<br>T3 mean=2.42(0.95)   | -0.15 (95% CI=<br>-0.38 to 0.08)  | (n=52)<br>T1 mean=1.84(0.91)<br>T3 mean=2.42(0.95)   | 0.58 (95% CI=<br>0.33 to 0.84)    |
| APQ-28<br>Activity<br>progression | (n=65)<br>T1 mean=1.45(0.88)<br>T2 mean=2.39(0.89)     | 0.94 (95% CI=<br>0.65 to 1.22)    | (n=52)<br>T2 mean=2.40(0.91)<br>T3 mean=2.00(0.91)   | -0.40 (95% CI=<br>-0.75 to -0.05) | (n=52)<br>T1 mean=1.45(0.85)<br>T3 mean=2.00(0.91)   | 0.56 (95% CI=<br>0.24 to 0.87)    |
| Current<br>pain                   | (n=65)<br>T1 mean=6.63(1.97)<br>T2 mean=5.31(2.38)     | -1.32 (95% CI=<br>-1.91 to -0.74) | (n=52)<br>T2 mean=5.04(2.36)<br>T3 mean=5.65(2.31)   | 0.62 (95% CI=<br>-0.08 to 1.31)   | (n=52)<br>T1 mean=6.58(1.99)<br>T3 mean=5.65(2.31)   | -0.92 (95% CI=<br>-1.58 to -0.27) |
| Usual pain                        | (n=65)<br>T1 mean=7.30(1.82)<br>T2 mean=6.62(2.08)     | -0.68 (95% CI=<br>-1.19 to -0.18) | (n=51)<br>T2 mean=6.53(2.10)<br>T3 mean=6.55(1.91)   | 0.02 (95% CI=<br>-0.48 to 0.52)   | (n=50)<br>T1 mean=7.30(1.62)<br>T3 mean=6.54(1.93)   | -0.76 (95% CI=<br>-1.27 to -0.25) |
| Physical<br>fatigue               | (n=62)<br>T1 mean= 15.22(4.10)<br>T2 mean= 20.31(3.92) | 5.08 (95% CI=<br>3.95 to 6.21)    | (n=51)<br>T2 mean=20.47(4.13)<br>T3 mean=18.12(4.18) | -2.35 (95% CI=<br>-3.44 to -1.26) | (n=49)<br>T1 mean=15.35(3.90)<br>T3 mean=18.18(4.16) | 2.84 (95% CI=<br>1.34 to 4.33)    |

|                |                                                        |                                |                                                        |                               |                                                        |                                |
|----------------|--------------------------------------------------------|--------------------------------|--------------------------------------------------------|-------------------------------|--------------------------------------------------------|--------------------------------|
| Mental fatigue | (n=64)<br>T1 mean=8.86(2.77)<br>T2 mean=11.28(2.43)    | 2.42 (95% CI= 1.75 to 3.10)    | (n=51)<br>T2 mean=11.45(2.20)<br>T3 mean=10.92(2.34)   | -0.53 (95% CI= -1.17 to 0.11) | (n=51)<br>T1 mean=8.94(2.51)<br>T3 mean=10.92(2.34)    | 1.98 (95% CI= 1.33 to 2.64)    |
| Depression     | (n=63)<br>T1 mean=13.65(6.44)<br>T2 mean=7.14(6.09)    | -6.51 (95% CI= -7.72 to -5.31) | (n=51)<br>T2 mean=6.27(5.49)<br>T3 mean=9.23(5.75)     | 2.96 (95% CI= 1.64 to 4.29)   | (n=51)<br>T1 mean=13.18(6.35)<br>T3 mean=9.09(5.76)    | -4.09 (95% CI= -5.61 to -2.57) |
| Anxiety        | (n=65)<br>T1 mean=9.91(5.47)<br>T2 mean=5.40(5.13)     | -4.51 (95% CI= -5.60 to -3.42) | (n=52)<br>T2 mean=4.65(4.47)<br>T3 mean=6.10(5.23)     | 1.44 (95% CI= 0.55 to 2.33)   | (n=52)<br>T1 mean=9.47(5.06)<br>T3 mean=6.10(5.23)     | -3.37 (95% CI= -4.63 to -2.12) |
| Self-efficacy  | (n=65)<br>T1 mean=25.29(10.60)<br>T2 mean=36.29(14.12) | 11.00 (95% CI= 8.44 to 13.56)  | (n=52)<br>T2 mean=37.96(14.12)<br>T3 mean=34.68(14.26) | -3.28 (95% CI= -7.17 to 0.60) | (n=52)<br>T1 mean=25.85(10.74)<br>T3 mean=34.68(14.26) | 8.83 (95% CI= 5.86 to 11.81)   |
| Avoidance      | (n=64)<br>T1 mean=13.27(5.49)<br>T2 mean=10.28(5.89)   | -2.98 (95% CI= -4.43 to -1.54) | (n=52)<br>T2 mean=10.85(5.93)<br>T3 mean=12.12(5.79)   | 1.27 (95% CI= -0.27 to 2.81)  | (n=52)<br>T1 mean=13.58(5.66)<br>T3 mean=12.12(5.79)   | -1.46 (95% CI= -3.02 to 0.10)  |

|                   |                                                        |                              |                                                        |                                |                                                        |                              |
|-------------------|--------------------------------------------------------|------------------------------|--------------------------------------------------------|--------------------------------|--------------------------------------------------------|------------------------------|
| Physical function | (n=63)<br>T1 mean=34.15(8.23)<br>T2 mean=38.82(9.06)   | 4.67 (95% CI= 2.69 to 6.65)  | (n=49)<br>T2 mean=39.45(8.72)<br>T3 mean=36.63(9.69)   | -2.82 (95% CI= -5.29 to -0.35) | (n=47)<br>T1 mean=34.92(7.98)<br>T3 mean=36.55(9.81)   | 1.62 (95% CI= -0.81 to 4.06) |
| Mental function   | (n=63)<br>T1 mean=38.52(11.10)<br>T2 mean=45.83(11.48) | 7.30 (95% CI= 4.49 to 10.12) | (n=49)<br>T2 mean=46.75(10.82)<br>T3 mean=44.78(10.44) | -1.97 (95% CI= -5.22 to 1.29)  | (n=47)<br>T1 mean=38.61(10.65)<br>T3 mean=44.56(10.60) | 5.95 (95% CI= 2.83 to 9.08)  |
| Quality of life   | (n=59)<br>T1 mean=0.43(0.25)<br>T2 mean=0.56(0.28)     | 0.13 (95% CI= 0.07 to 0.18)  | (n=48)<br>T2 mean=0.60(0.25)<br>T3 mean=0.51(0.28)     | -0.09 (95% CI= -0.14 to -0.03) | (n=45)<br>T1 mean=0.45(0.24)<br>T3 mean=0.52(0.29)     | 0.07 (95% CI= 0.001 to 0.14) |

*Activity pacing (Activity Pacing Questionnaire-28, APQ-28), Pain (Numerical Rating Scale 0-10), Physical/mental fatigue (Chalder Fatigue Questionnaire), Depression (Patient Health Questionnaire-9), Anxiety (Generalised Anxiety Disorder-7), Self-efficacy (Pain Self-Efficacy Questionnaire), Avoidance (Escape and avoidance subscale of the Pain Anxiety Symptoms Scale-20) Physical/mental function (Short-Form 12), Quality of life (EQ-5D-5L index score)*

1  
2  
3 **Associations between changes in activity pacing and symptoms: pre-post**  
4 **treatment (Objective 4)**  
5  
6  
7  
8  
9

10 Between T1-T2, there were significant correlations between increased APQ-28  
11 Activity acceptance and decreased current pain ( $r_s(65)=-0.29$ ,  $p=0.019$ ). Increased  
12 self-efficacy significantly correlated with all APQ-28 subthemes ( $p<0.05$ ) except  
13 APQ-28 Activity adjustment. Increased mental function was significantly correlated  
14 with increased APQ-28 Activity adjustment ( $r_s(61)=0.28$ ,  $p=0.030$ ) and Activity  
15 acceptance ( $r_s(63)=0.27$ ,  $p=0.031$ ). (See Table 4.)  
16  
17  
18  
19  
20  
21  
22  
23  
24  
25

26 There were no statistically significant correlations between the changes in any of the  
27 APQ-28 subthemes and changes in usual pain, physical/mental fatigue, depression,  
28 anxiety, avoidance, physical function or quality of life. Sensitivity analyses found the  
29 same pattern of significant/non-significant correlations when excluding the two new  
30 APQ-28 items.  
31  
32  
33  
34  
35  
36  
37  
38  
39  
40  
41  
42  
43  
44  
45  
46  
47  
48  
49  
50  
51  
52  
53  
54  
55  
56  
57  
58  
59  
60

**Table 4. Associations between changes in activity pacing and changes in symptoms between T1 and T2**

|                  | APQ-28 Activity<br>adjustment | APQ-28 Activity<br>planning             | APQ-28 Activity<br>consistency            | APQ-28 Activity<br>acceptance              | APQ-28 Activity<br>progression          |
|------------------|-------------------------------|-----------------------------------------|-------------------------------------------|--------------------------------------------|-----------------------------------------|
| Current pain     | $r_s(63)=-0.06, p=0.655$      | $r(65)=-0.15, p=0.223$                  | $r_s(65)=-0.06, p=0.616$                  | <b><math>r_s(65)=-0.29, p=0.019</math></b> | $r(65)=-0.17, p=0.189$                  |
| Usual pain       | $r_s(61)=0.04, p=0.765$       | $r(63)=-0.21, p=0.103$                  | $r_s(63)=0.001, p=0.996$                  | $r_s(63)=-0.09, p=0.508$                   | $r(63)=-0.15, p=0.910$                  |
| Physical fatigue | $r_s(62)=0.14, p=0.270$       | $r(62)=0.09, p=0.473$                   | $r_s(62)=0.20, p=0.121$                   | $r_s(62)=0.16, p=0.205$                    | $r(62)=0.15, p=0.256$                   |
| Mental fatigue   | $r_s(63)=0.03, p=0.836$       | $r_s(64)=-0.02, p=0.849$                | $r_s(64)=0.07, p=0.563$                   | $r_s(64)=-0.07, p=0.580$                   | $r_s(63)=-0.02, p=0.849$                |
| Depression       | $r_s(61)=-0.17, p=0.194$      | $r_s(63)=-0.13, p=0.310$                | $r_s(63)=-0.04, p=0.744$                  | $r_s(63)=-0.18, p=0.153$                   | $r_s(63)=-0.19, p=0.138$                |
| Anxiety          | $r_s(63)=-0.11, p=0.415$      | $r(65)=-0.19, p=0.122$                  | $r_s(65)=0.02, p=0.899$                   | $r_s(65)=-0.19, p=0.132$                   | $r(65)=-0.21, p=0.101$                  |
| Self-efficacy    | $r_s(63)=0.23, p=0.074$       | <b><math>r(65)=0.31, p=0.012</math></b> | <b><math>r_s(65)=0.26, p=0.034</math></b> | <b><math>r_s(65)=0.39, p=0.002</math></b>  | <b><math>r(65)=0.34, p=0.006</math></b> |
| Avoidance        | $r_s(63)=-0.03, p=0.801$      | $r(64)=-0.13, p=0.294$                  | $r_s(64)=-0.01, p=0.932$                  | $r_s(64)=0.09, p=0.495$                    | $r(64)=-0.10, p=0.430$                  |

|                   |                                           |                       |                         |                                           |                       |
|-------------------|-------------------------------------------|-----------------------|-------------------------|-------------------------------------------|-----------------------|
| Physical function | $r_s(61)=-0.05, p=0.708$                  | $r(63)=0.11, p=0.395$ | $r_s(63)=0.04, p=0.750$ | $r_s(63)=0.09, p=0.474$                   | $r(63)=0.15, p=0.230$ |
| Mental function   | <b><math>r_s(61)=0.28, p=0.030</math></b> | $r(63)=0.22, p=0.079$ | $r_s(63)=0.19, p=0.135$ | <b><math>r_s(63)=0.27, p=0.031</math></b> | $r(63)=0.24, p=0.056$ |
| Quality of life   | $r_s(58)=0.13, p=0.325$                   | $r(59)=0.26, p=0.051$ | $r_s(59)=0.05, p=0.695$ | $r_s(59)=0.23, p=0.078$                   | $r(59)=0.14, p=0.302$ |

*Significant correlations are highlighted in bold*

*Activity pacing (Activity Pacing Questionnaire-28, APQ-28), Pain (Numerical rating scale 0-10), Physical/mental fatigue (Chalder fatigue scale), Depression (Patient Health Questionnaire-9), Anxiety (Generalised Anxiety Disorder-7), Self-efficacy (Pain self-efficacy scale), Avoidance (Escape and avoidance subscale of the Pain Anxiety Symptoms Scale-20) Physical/mental function (Short-form 12), Quality of life (EQ-5D-5L)*



1  
2  
3 **Associations between changes in activity pacing and symptoms: pre-**  
4 **treatment to 3-months follow-up (Objective 4)**  
5  
6  
7  
8  
9

10 In addition to the significant correlations found during the pre-post treatment period  
11 (T1-T2) between various APQ-28 subthemes and improved current pain, self-  
12 efficacy and mental function; during the T1-T3 period the APQ-28 subthemes  
13 additionally correlated with improved physical and mental fatigue, improved quality of  
14 life, and reduced depression and anxiety ( $p < 0.05$ ). (See Table 5.)  
15  
16  
17  
18  
19  
20  
21  
22  
23

24 Similarly to the T1-T2 period, between T1-T3, there were no significant correlations  
25 between changes in any APQ-28 subthemes and usual pain, avoidance or physical  
26 function. Sensitivity analyses showed the same pattern of results when excluding the  
27 two new APQ-28 items with the exception of two non-significant associations  
28 between: Activity adjustment and mental function ( $r_s(46) = 2.78$ ,  $p = 0.062$ ) and Activity  
29 acceptance and depression ( $r_s(51) = -0.25$ ,  $p = 0.073$ ).  
30  
31  
32  
33  
34  
35  
36  
37  
38  
39  
40  
41  
42  
43  
44  
45  
46  
47  
48  
49  
50  
51  
52  
53  
54  
55  
56  
57  
58  
59  
60

**Table 5. Associations between changes in activity pacing and changes in symptoms between T1 and T3**

|                     | APQ-28 Activity<br>adjustment              | APQ-28 Activity<br>planning               | APQ-28 Activity<br>consistency             | APQ-28 Activity<br>acceptance              | APQ-28 Activity<br>progression             |
|---------------------|--------------------------------------------|-------------------------------------------|--------------------------------------------|--------------------------------------------|--------------------------------------------|
| Current pain        | $r_s(50)=-0.07, p=0.627$                   | $r(52)=-0.15, p=0.305$                    | <b><math>r(52)=-0.29, p=0.036</math></b>   | $r_s(52)=-0.09, p=0.522$                   | $r(52)=-0.22, p=0.120$                     |
| Usual pain          | $r_s(49)=-0.08, p=0.588$                   | $r(50)=-0.02, p=0.895$                    | $r(50)=0.07, p=0.634$                      | $r_s(50)=-0.15, p=0.287$                   | $r(50)=0.13, p=0.355$                      |
| Physical<br>fatigue | <b><math>r_s(48)=0.31, p=0.031</math></b>  | <b><math>r_s(49)=0.36, p=0.012</math></b> | <b><math>r_s(49)=0.34, p=0.018</math></b>  | <b><math>r_s(49)=0.35, p=0.014</math></b>  | <b><math>r_s(49)=0.40, p=0.005</math></b>  |
| Mental fatigue      | $r_s(49)=0.17, p=0.236$                    | <b><math>r(51)=0.40, p=0.004</math></b>   | <b><math>r(51)=0.36, p=0.009</math></b>    | $r_s(51)=0.24, p=0.089$                    | <b><math>r_s(51)=0.39, p=0.004</math></b>  |
| Depression          | <b><math>r_s(49)=-0.34, p=0.016</math></b> | $r_s(51)=-0.27, p=0.052$                  | <b><math>r_s(51)=-0.42, p=0.002</math></b> | <b><math>r_s(51)=-0.34, p=0.016</math></b> | <b><math>r_s(51)=-0.35, p=0.013</math></b> |
| Anxiety             | $r_s(50)=-0.28, p=0.051$                   | <b><math>r(52)=-0.31, p=0.024</math></b>  | <b><math>r(52)=-0.31, p=0.024</math></b>   | <b><math>r_s(52)=-0.46, p=0.001</math></b> | <b><math>r(52)=-0.34, p=0.015</math></b>   |
| Self-efficacy       | $r_s(50)=0.003, p=0.984$                   | <b><math>r(52)=0.35, p=0.010</math></b>   | <b><math>r(52)=0.42, p=0.002</math></b>    | $r_s(52)=0.25, p=0.070$                    | <b><math>r(52)=0.38, p=0.005</math></b>    |

|                   |                                           |                                         |                                         |                                           |                                         |
|-------------------|-------------------------------------------|-----------------------------------------|-----------------------------------------|-------------------------------------------|-----------------------------------------|
|                   |                                           |                                         |                                         |                                           |                                         |
| Avoidance         | $r_s(50)=-0.08, p=0.580$                  | $r(52)=-0.20, p=0.148$                  | $r(52)=-0.14, p=0.320$                  | $r_s(52)=-0.24, p=0.092$                  | $r(52)=-0.22, p=0.126$                  |
| Physical function | $r_s(46)=-0.11, p=0.461$                  | $r(47)=0.07, p=0.653$                   | $r(47)=0.17, p=0.267$                   | $r_s(47)=0.09, p=0.563$                   | $r(47)=0.19, p=0.214$                   |
| Mental function   | <b><math>r_s(46)=0.29, p=0.049</math></b> | <b><math>r(47)=0.44, p=0.002</math></b> | <b><math>r(47)=0.41, p=0.004</math></b> | $r_s(47)=0.18, p=0.236$                   | <b><math>r(47)=0.41, p=0.004</math></b> |
| Quality of life   | $r_s(43)=0.25, p=0.109$                   | <b><math>r(45)=0.36, p=0.015</math></b> | $r(45)=0.23, p=0.127$                   | <b><math>r_s(45)=0.46, p=0.001</math></b> | <b><math>r(45)=0.40, p=0.006</math></b> |

*Significant correlations are highlighted in bold*

*Pain (Numerical rating scale 0-10), Physical/mental fatigue (Chalder fatigue scale), Depression (Patient Health Questionnaire-9), Anxiety (Generalised Anxiety Disorder-7), Self-efficacy (Pain self-efficacy scale), Avoidance (Escape and avoidance subscale of the Pain Anxiety Symptoms Scale-20) Physical/mental function (Short-form 12), Quality of life (EQ-5D-5L)*

## DISCUSSION

This study fulfilled the original aims of testing the feasibility and acceptability of using a new activity pacing framework to standardise instructions of activity pacing to assist planning a future effectiveness RCT. The study recruited to target and patients with chronic pain and chronic fatigue demonstrated improvements in pacing strategies and reductions in symptoms.

### Feasibility

The activity pacing framework demonstrated feasibility through excellent fidelity to the framework by healthcare professionals via self-reported checklists and observations. Acceptability was demonstrated through patients' high satisfaction scores. Not all patients completed the activity diaries, however, this was optional for patients to facilitate their own self-reflection.

The recruitment rate (77%) was higher than estimated in the study protocol (50%). This was similar to a study exploring a five-week exercise programme for chronic hip pain (recruitment rate=76%),[43]; and this rate is considered 'Good' using cut-off levels of 80%=excellent and 70%=good from a feasibility study exploring a mind-body physical activity programme for chronic pain,[44]. The attrition rate between T1-T2 (39.3%) was as predicted in the protocol (40%), and lower than the 60% attrition rates reported across other studies investigating programmes for chronic pain,[20]. The attrition rate between T2-T3 (20.0%) was lower than predicted in the protocol

1  
2  
3 (50%), and the target sample size proved feasible to attain. These  
4  
5 recruitment/attrition rates will inform a future definitive RCT.  
6  
7  
8  
9

10 Regarding treatment adherence, only 56.1% of participants recruited at T1 attended  
11 both pacing sessions. Many participants (n=18, 16.8%) dropped out after the first  
12 session and therefore did not attend any pacing sessions. Reasons for early drop-  
13 out often include unrealistic expectations of symptom improvement, low motivation,  
14 or confidence to commit to programmes or behavioural changes,[20]. In comparison,  
15 attendance rates of both pacing sessions among those who completed T2 were  
16 83.1%, and 89.2% of participants attended five or more sessions. This is comparable  
17 to adherence rates of 81% seen elsewhere,[43]; and adherence rates have been  
18 considered as 'Excellent' when 70% or more participants complete 75% of  
19 sessions,[44].  
20  
21  
22  
23  
24  
25  
26  
27  
28  
29  
30  
31  
32  
33  
34

35 Participants reported the condition of low back pain most frequently and CFS/ME the  
36 least frequently, as per current prevalence rates,[45, 46]. Our findings re-iterate the  
37 high occurrence of co-morbidities, and frequent co-existence of chronic pain among  
38 patients with CFS/ME,[9]. Participants with CFS/ME demonstrated improvements in  
39 symptoms following treatment, in comparison to other studies in which pacing has  
40 been ineffective,[47]. Disparate to the study by White et al.,[47], the activity pacing  
41 framework encourages a rehabilitative rather than an adaptive approach. The effects  
42 of rehabilitative approaches for patients with both chronic pain and fatigue requires  
43 causative investigation.  
44  
45  
46  
47  
48  
49  
50  
51  
52  
53  
54  
55  
56  
57  
58  
59  
60

## Clinical outcomes

Activity pacing improved across all APQ-28 subthemes, the largest improvement being for Activity planning. This theme refers to planning activities, setting time targets and assessing activity levels,[32]; practical facets of pacing which may be more accessible to change. Comparably, participants showed smaller improvements in Activity acceptance. This subtheme includes setting realistic goals and allowing flexibility; facets that involve changing previous behaviours or self-enforced rules. The APQ-28 detected multidimensional changes in activity pacing, and the two new items appeared to complement the scale. Further study will validate the APQ-28 in a larger sample and estimate minimally important changes.

The aims of the activity pacing framework are to improve patients' function and quality of life. Improvements in physical function were seen between T1-T2 (mean change=4.67) that were greater than the minimally clinically important change (3.29),[48]. However, much of this improvement was lost at T3. Together with avoidance, physical function showed improvements that were not sustained at three months' follow-up. Physical function may be a component of rehabilitation in which patients feel least confident, especially those with avoidant behaviours,[20]. This may have implications for future programmes to integrate follow-up sessions to encourage longer-term maintenance of physical activity. Contrastingly, improvements in mental fatigue between T1-T2 (mean change=7.3) were better maintained between T1-T3 (mean change=5.95); and both higher than the minimally clinically important change (3.77),[48]. Quality of life also improved between T1-T2 (mean change=0.13) and much this improvement was maintained between T1-T3

1  
2  
3 (mean change=0.07); both changes exceeded the minimally important difference  
4  
5 (0.037 +/-0.008),[49].  
6  
7  
8  
9

10 The activity pacing framework additionally aims to increase patients' self-efficacy.  
11  
12 Improvements in self-efficacy were found between T1 (mean=25.29) and T2  
13  
14 (mean=36.29), which were well maintained at T3 (mean=34.68). Scores were lower  
15  
16 than the  $\geq 40$  cut off. However, an improvement of  $>5.5$  was attained which is  
17  
18 considered a minimally important change,[50]. Both physical and mental fatigue  
19  
20 improved, and improvements in mental fatigue appeared to be better maintained at  
21  
22 T3. Comparisons to minimally important changes are unavailable.  
23  
24  
25  
26  
27

28 Psychological health improved following the rehabilitation programme, including  
29  
30 reduced depression scores from moderate to mild (T1=13.7, T2=7.1, T3=9.1); with a  
31  
32 clinically significant reduction ( $\geq 5$ ) between T1-T2,[36]. Mean anxiety scores reduced  
33  
34 (T1=9.9, T2=5.4 and T3=6.10), and remained within the classification of mild  
35  
36 anxiety,[37]. Although reductions in pain were not a direct aim of treatment, lower  
37  
38 pain severity was reported.  
39  
40  
41  
42  
43

44 There were fewer significant correlations between changes in activity pacing and  
45  
46 symptoms pre-post treatment (T1-T2) than longer-term (T1-T3). This may be due to  
47  
48 participants undertaking a more experimental phase during T1-T2 (such as finding  
49  
50 baselines, (re-)starting activities), whereas new routines were more established  
51  
52 between T1-T3. Noticeably, changes in activity pacing were more frequently  
53  
54 associated with improvements in psychological wellbeing rather than physical  
55  
56  
57  
58  
59  
60

1  
2  
3 wellbeing. Similarly, a meta-analysis found pacing was not associated with improved  
4  
5 physical function among patients with chronic conditions,[5].  
6  
7  
8  
9

## 10 **Strengths and limitations**

11  
12  
13

14 Despite recruiting to target, this sample was not powered with a control arm to  
15  
16 determine treatment effectiveness. The exploratory statistical analyses were  
17  
18 correlative and do not indicate causation between increased activity pacing and  
19  
20 improved symptoms. As per other studies exploring activity pacing, pacing was  
21  
22 instructed as one component of the rehabilitation programme,[5]. Therefore,  
23  
24 improvements in symptoms may have resulted from any combination of coping  
25  
26 strategies. A future RCT will implement a suitable control to explore the effects of  
27  
28 pacing, while implementing the activity pacing framework in a clinically relevant  
29  
30 setting, including alongside other coping strategies.  
31  
32  
33  
34  
35  
36

37 The generalisability of this study is limited to a sample of predominantly females and  
38  
39 white ethnic origin. Recruitment occurred only at one Pain Service and this service  
40  
41 had an existing rehabilitation programme for both chronic pain and fatigue. Bias may  
42  
43 have arisen through the lead researcher delivering the healthcare professionals'  
44  
45 training and undertaking the observations. Further work will test the activity pacing  
46  
47 framework and study protocol across other healthcare services and explore fidelity  
48  
49 over wider geographical locations.  
50  
51  
52  
53  
54

55 It is unknown what potential bias was caused by the attrition rate. However, there  
56  
57 were no differences at baseline between those who completed the programme and  
58  
59  
60



1  
2  
3 those who dropped out. The attrition rate may be reflective of some of the clinical  
4 challenges and missed appointments surrounding the complexity of chronic  
5 pain/fatigue. Further research could explore whether providing a follow-up improves  
6 commitment to activity pacing.  
7  
8  
9  
10  
11  
12  
13

### 14 **Modifications for future study**

15  
16  
17  
18  
19 Since more patients completed the T1 questionnaires during the rehabilitation  
20 sessions than at home, this may be the preferable mode of distribution. To lessen  
21 the time taken to complete the questionnaires, the PASS-20 may be considered for  
22 exclusion in future study. The whole 20-item PASS scale was included for reliability  
23 and validity, but data from only the Escape and Avoidance subscale was explored.  
24  
25  
26  
27  
28  
29  
30  
31  
32  
33  
34  
35  
36  
37  
38  
39  
40  
41  
42  
43  
44  
45  
46  
47  
48  
49  
50  
51  
52  
53  
54  
55  
56  
57  
58  
59  
60  
Modifications to the inclusion criteria may include patients with any chronic spinal  
pain, including cervical/thoracic pain due to the frequent and similar presentation at  
rehabilitation services.

### 40 **Conclusion**

41  
42  
43  
44  
45  
46  
47  
48  
49  
50  
51  
52  
53  
54  
55  
56  
57  
58  
59  
60  
To the authors' knowledge, this is the first study to explore the clinical utility of a  
comprehensive activity pacing framework developed for both chronic pain and  
chronic fatigue. The newly developed activity pacing framework proved feasible to  
use clinically by healthcare professionals. Patients with both chronic pain and fatigue  
implemented greater activity pacing strategies following treatment, alongside  
reporting improvements in quality of life, psychological wellbeing, self-efficacy, pain  
and fatigue. Physical function and avoidance improved to a lesser extent and for the

1  
2  
3 shorter-term. Improvements in activity pacing were significantly associated with  
4  
5 improvements in cognitive/psychological wellbeing and quality of life, but not physical  
6  
7 function or avoidance. Future study will use the activity pacing framework in an  
8  
9 effectiveness RCT to explore the effects of activity pacing on symptoms.  
10  
11  
12  
13

## 14 **ACKNOWLEDGEMENTS**

15  
16  
17  
18  
19 We would like to acknowledge all of the patients and healthcare professionals who  
20  
21 were involved in this study. We would also like to acknowledge our statistical  
22  
23 support.  
24  
25  
26  
27

## 28 **SOURCES OF FUNDING**

29  
30  
31  
32  
33 Dr Deborah Antcliff is funded by a Health Education England/National Institute for  
34  
35 Health Research (HEE/NIHR) Clinical Lectureship for this research project.  
36  
37  
38  
39

## 40 **DISCLAIMER**

41  
42  
43  
44 This paper presents independent research funded by Health Education  
45  
46 England/National Institute for Health Research (NIHR) [Clinical Lectureship (ICA-CL-  
47  
48 2015-01-019)]. The views expressed are those of the author(s) and not necessarily  
49  
50 those of the NHS, the NIHR or the Department of Health and Social Care.  
51  
52  
53  
54

## 55 **CONFLICT OF INTEREST**

1  
2  
3 All authors declare no conflicts of interest  
4  
5  
6

7  
8 **AUTHOR CONTRIBUTIONS**  
9

10 All authors contributed to the conception and design of the study. DA undertook the  
11 acquisition of the data. All authors contributed to the analysis and interpretation of  
12 data. All authors contributed to drafting the manuscript and revising it critically for  
13 important intellectual content and have approved the final version for publication.  
14  
15  
16  
17  
18

19 Authors are in agreement to be accountable for all aspects of the work in ensuring  
20 that questions related to the accuracy or integrity of any part of the work are  
21 appropriately investigated and resolved.  
22  
23  
24  
25  
26  
27  
28  
29  
30  
31  
32  
33  
34  
35  
36  
37  
38  
39  
40  
41  
42  
43  
44  
45  
46  
47  
48  
49  
50  
51  
52  
53  
54  
55  
56  
57  
58  
59  
60

35 **PATIENT CONSENT FOR PUBLICATION**  
36

37 Not required.  
38  
39  
40  
41

42 **DATA SHARING AGREEMENT**  
43

44 Deidentified participant data are available from the corresponding author  
45 (Deborah.Antcliff@pat.nhs.uk) upon reasonable request. Reuse is permitted for  
46 health and care research as long as the original authors are acknowledged. The  
47 protocol can also be requested from the author or accessed at ClinicalTrials.gov  
48 (NCT03497585).  
49  
50  
51  
52  
53  
54  
55  
56  
57  
58  
59  
60

## ETHICAL APPROVAL

Ethical approval was granted by the London-Surrey Research Ethics Committee (18/LO/0655).

## REFERENCES

1. Torrance N, Smith BH, Elliott AM, et al. Potential pain management programmes in primary care. A UK-wide questionnaire and Delphi survey of experts. *Fam Pract* 2011;28:41-8.
2. Nijs J, Meeus M, De Meirleir K. Chronic musculoskeletal pain in chronic fatigue syndrome: recent developments and therapeutic implications. *Man Ther* 2006;11:187-91.
3. Nielson WR, Jensen MP, Karsdorp PA, et al. Activity pacing in chronic pain: concepts, evidence, and future directions. *Clin J Pain* 2013;29:461-8.
4. Antcliff D, Keenan AM, Keeley P, et al. Survey of activity pacing across healthcare professionals informs a new activity pacing framework for chronic pain/fatigue. *Musculoskeletal Care* 2019;17:335-45.
5. Abonie US, Sandercock GRH, Heesterbeek M, et al. Effects of activity pacing in patients with chronic conditions associated with fatigue complaints: a meta-analysis. *Disabil Rehabil* 2020;42:613-22.
6. Aggarwal VR, McBeth J, Zakrzewska JM, et al. The epidemiology of chronic syndromes that are frequently unexplained: do they have common associated factors? *Int J Epidemiol* 2006;35:468-76.
7. Meeus M, Nijs J. Central sensitization: a biopsychosocial explanation for chronic widespread pain in patients with fibromyalgia and chronic fatigue syndrome. *Clin Rheumatol* 2007;26:465-73.

- 1  
2  
3 8. Davis LL, Kroenke K, Monahan P, et al. The SPADE Symptom Cluster in Primary  
4  
5 Care Patients With Chronic Pain. *Clin J Pain* 2016;32:388-93.  
6
- 7  
8 9. Meeus M, Nijs J, Meirleir KD. Chronic musculoskeletal pain in patients with the  
9  
10 chronic fatigue syndrome: a systematic review. *Eur J Pain* 2007;11:377-86.  
11
- 12  
13 10. Tavel ME. Somatic symptom disorders without known physical causes: one  
14  
15 disease with many names? *Am J Med* 2015;128:1054-8.  
16
- 17  
18 11. Yunus MB. Fibromyalgia and overlapping disorders: the unifying concept of  
19  
20 central sensitivity syndromes. *Semin Arthritis Rheum* 2007;36:339-56.  
21
- 22  
23 12. Nijs J, Meeus M, Van Oosterwijck J, et al. In the mind or in the brain? Scientific  
24  
25 evidence for central sensitisation in chronic fatigue syndrome. *Eur J Clin Invest*  
26  
27 2012;42:203-12.  
28
- 29  
30 13. Arendt-Nielsen L, Morlion B, Perrot S, et al. Assessment and manifestation of  
31  
32 central sensitisation across different chronic pain conditions. *Eur J Pain*  
33  
34 2018;22:216-241.  
35
- 36  
37 14. Vlaeyen JW, Linton SJ. Fear-avoidance and its consequences in chronic  
38  
39 musculoskeletal pain: a state of the art. *Pain* 2000;85:317-32.  
40
- 41  
42 15. Moseley GL. A pain neuromatrix approach to patients with chronic pain. *Man*  
43  
44 *Ther* 2003;8:130-40.  
45
- 46  
47 16. Ericsson A, Mannerkorpi K. How to manage fatigue in fibromyalgia:  
48  
49 nonpharmacological options. *Pain Manag* 2016;6:331-8.  
50
- 51  
52 17. British Pain Society. Guidelines for pain management programmes for adults.  
53  
54 London: British Pain Society, 2013.  
55
- 56  
57 18. Beissner K, Henderson CR, Jr., Papaleontiou M, et al. Physical therapists' use of  
58  
59 cognitive-behavioral therapy for older adults with chronic pain: a nationwide survey.  
60  
*Phys Ther* 2009;89:456-69.

- 1  
2  
3 19. Booth J, Moseley GL, Schiltenswolf M, et al. Exercise for chronic musculoskeletal  
4 pain: A biopsychosocial approach. *Musculoskeletal Care* 2017;15:413-421.  
5  
6  
7 20. Anderson RJ, Hurley RW, Staud R, et al. Cognitive-motivational influences on  
8 health behavior change in adults with chronic pain. *Pain Med* 2016;17:1079-1093.  
9  
10  
11 21. Birkholtz M, Aylwin L, Harman RM. Activity pacing in chronic pain management:  
12 One aim, but which method? Part one: Introduction and literature review. *British*  
13 *Journal of Occupational Therapy* 2004;67:447-52.  
14  
15  
16 22. Abonie US, Edwards AM, Hettinga FJ. Optimising activity pacing to promote a  
17 physically active lifestyle in medical settings: A narrative review informed by clinical  
18 and sports pacing research. *J Sports Sci* 2020;38:590-596.  
19  
20  
21 23. Jamieson-Lega K, Berry R, Brown CA. Pacing: A concept analysis of a chronic  
22 pain intervention. *Pain Res Manag* 2013;18:207-13.  
23  
24  
25 24. Andrews NE and Deen M. Defining activity pacing: Is it time to jump off the  
26 merry-go-round? *J Pain* 2016;17:1359-1362.  
27  
28  
29 25. Andrews NE, Strong J, Meredith PJ. Activity pacing, avoidance, endurance, and  
30 associations with patient functioning in chronic pain: a systematic review and meta-  
31 analysis. *Arch Phys Med Rehabil* 2012;93:2109-2121 e7.  
32  
33  
34 26. Murphy SL, Clauw DJ. Activity pacing: what are we measuring and how does  
35 that relate to intervention? *Pain* 2010;149:582-3.  
36  
37  
38 27. Craig P, Dieppe P, Macintyre S, et al. Medical Research Council Guidance.  
39 Developing and evaluating complex interventions: The new Medical Research  
40 Council guidance. *BMJ* 2008;337:a1655. doi: 10.1136/bmj.a1655.  
41  
42  
43 28. Antcliff D, Keenan AM, Keeley P, et al. Engaging stakeholders to refine an  
44 activity pacing framework for chronic pain/fatigue: A nominal group technique.  
45  
46  
47 *Musculoskeletal Care* 2019;17:354-362.  
48  
49  
50  
51  
52  
53  
54  
55  
56  
57  
58  
59  
60

- 1  
2  
3 29. Lancaster GA, Thabane L. Guidelines for reporting non-randomised pilot and  
4 feasibility studies. *Pilot Feasibility Stud* 2019;5:114.  
5  
6  
7  
8 30. Eldridge SM, Chan CL, Campbell MJ, et al. CONSORT 2010 statement:  
9 extension to randomised pilot and feasibility trials. *BMJ* 2016;355:i5239.  
10  
11  
12 31. Sim J, Lewis M. The size of a pilot study for a clinical trial should be calculated in  
13 relation to considerations of precision and efficiency. *J Clin Epidemiol* 2012;65:301-  
14 8.  
15  
16  
17  
18 32. Antcliff D, Campbell M, Woby S, et al. Assessing the psychometric properties of  
19 an activity pacing questionnaire for chronic pain and fatigue. *Phys Ther*  
20 2015;95:1274-86.  
21  
22  
23  
24 33. Jensen MP, Turner JA, Romano JM. What is the maximum number of levels  
25 needed in pain intensity measurement? *Pain* 1994;58:387-92.  
26  
27  
28  
29 34. Chalder T, Berelowitz G, Pawlikowska T, et al. Development of a fatigue scale. *J*  
30 *Psychosom Res* 1993;37:147-53.  
31  
32  
33  
34 35. Kroenke K, Spitzer RL, Williams JB. The PHQ-9: validity of a brief depression  
35 severity measure. *J Gen Intern Med* 2001;16:606-13.  
36  
37  
38  
39 36. Kroenke K, Spitzer RL, Williams JB, et al. The Patient Health Questionnaire  
40 Somatic, Anxiety, and Depressive Symptom Scales: a systematic review. *Gen Hosp*  
41 *Psychiatry* 2010;32:345-59.  
42  
43  
44  
45 37. Spitzer RL, Kroenke K, Williams JB, et al. A brief measure for assessing  
46 generalized anxiety disorder: the GAD-7. *Arch Intern Med* 2006;166:1092-7.  
47  
48  
49  
50 38. Nicholas MK. The pain self-efficacy questionnaire: Taking pain into account. *Eur*  
51 *J Pain* 2007;11:153-63.  
52  
53  
54  
55 39. McCracken LM, Dhingra L. A short version of the Pain Anxiety Symptoms Scale  
56 (PASS-20): preliminary development and validity. *Pain Res Manag* 2002;7:45-50.  
57  
58  
59  
60

- 1  
2  
3 40. Ware J, Jr., Kosinski M, Keller SD. A 12-Item Short-Form Health Survey:  
4 construction of scales and preliminary tests of reliability and validity. *Medical Care*  
5 1996;34:220-33.  
6  
7  
8  
9  
10 41. Herdman M, Gudex C, Lloyd A, et al. Development and preliminary testing of the  
11 new five-level version of EQ-5D (EQ-5D-5L). *Qual Life Res* 2011;20:1727-36.  
12  
13 42. van Hout B, Janssen MF, Feng Y, et al. Interim Scoring for the EQ-5D-5L:  
14 Mapping the EQ-5D-5L to EQ-5D-3L Value Sets. *Value in Health* 2012;15:708 –715.  
15  
16  
17 43. Bearne LM, Walsh NE, Jessep S, et al. Feasibility of an exercise-based  
18 rehabilitation programme for chronic hip pain. *Musculoskeletal Care* 2011;9:160-8.  
19  
20 44. Greenberg J, Lin A, Zale EL, et al. Development And Early Feasibility Testing Of  
21 A Mind-Body Physical Activity Program For Patients With Heterogeneous Chronic  
22 Pain; The GetActive Study. *J Pain Res* 2019;12:3279-3297.  
23  
24 45. Hartvigsen J, Hancock MJ, Kongsted A, et al. What low back pain is and why we  
25 need to pay attention. *Lancet* 2018;391:2356-67.  
26  
27 46. NICE. Chronic fatigue syndrome/myalgic encephalomyelitis (or encephalopathy).  
28 *NICE Clinical Guideline 53 London* 2007.  
29  
30 47. White PD, Goldsmith KA, Johnson AL, et al. Comparison of adaptive pacing  
31 therapy, cognitive behaviour therapy, graded exercise therapy, and specialist  
32 medical care for chronic fatigue syndrome (PACE): a randomised trial. *Lancet*  
33 2011;377:823-36.  
34  
35 48. Diaz-Arribas MJ, Fernandez-Serrano M, Royuela A et al. Minimal Clinically  
36 Important Difference in Quality of Life for Patients With Low Back Pain. *Spine (Phila*  
37 *Pa 1976)* 2017;42:1908-1916.  
38  
39  
40  
41  
42  
43  
44  
45  
46  
47  
48  
49  
50  
51  
52  
53  
54  
55  
56  
57  
58  
59  
60



1  
2  
3 49. McClure NS, Sayah FA, Xie F, et al. Instrument-Defined Estimates of the  
4  
5 Minimally Important Difference for EQ-5D-5L Index Scores. *Value Health*  
6  
7 2017;20:644-650.  
8  
9

10 50. Chiarotto A, Vanti C, Cedraschi C, et al. Responsiveness and Minimal Important  
11  
12 Change of the Pain Self-Efficacy Questionnaire and Short Forms in Patients With  
13  
14 Chronic Low Back Pain. *J Pain* 2016;17:707-18.  
15  
16

### 17 18 19 **FIGURE LEGENDS**

20  
21 Figure 1. Activity pacing conceptual model taken from the activity pacing framework

22  
23 Figure 2: CONSORT diagram showing the flow of participants through the study

24  
25 Figure 3. Participants' written comments following attending the rehabilitation  
26  
27 programme  
28  
29

1  
2  
3  
4  
5 This framework uses the term 'Activity Pacing', which may be more similar to an  
6 operant approach, driven by quota-contingency rather than symptom-contingency.  
7  
8 Our model of pacing moves beyond a purely behavioural approach since it also  
9  
10 integrates thoughts and beliefs. Activity pacing within this framework encourages  
11  
12 acceptance, active decision-making and flexibility, both in selecting which facets of  
13  
14 pacing to implement and also when to pace.

15  
16  
17 This pacing model is based upon addressing behaviours such as fear-avoidance,  
18  
19 excessive persistence and overactivity-underactivity cycling. This pacing model  
20  
21 includes the potential for reversibility of some of the consequences of chronic  
22  
23 pain/fatigue, for example, to reduce disability. As such, activity pacing is described  
24  
25 as a rehabilitative strategy rather than an adaptive strategy in this framework.

26  
27 In keeping with a rehabilitative approach, the aims of activity pacing within this  
28  
29 framework include: improved physical and cognitive function, improved quality of  
30  
31 life, increased sense of control and choice, and increased satisfaction with  
32  
33 activities. Activity pacing may improve the management and ability to cope with  
34  
35 symptoms where there is greater acceptance and flexibility. This framework does  
36  
37 not advocate the use of activity pacing with the direct aim of reducing symptoms  
38  
39 when this results in decreased function or dissatisfaction, or if this encourages  
40  
41 avoidant behaviour/working below tolerance levels.

42  
43 This activity pacing framework recognises pacing as a multidimensional concept  
44  
45 that involves different facets, such as breaking down tasks, finding baselines of  
46  
47 tolerable activities, implementing consistent levels of activities, planning activities,  
48  
49 setting goals of meaningful activities, accepting activity levels and gradually  
50  
51 increasing activities. Different facets of activity pacing are tailored to individuals'  
52  
53 needs, aims and activity behaviours.

54  
55  
56 *Figure 1. Activity pacing conceptual model taken from the activity pacing framework*  
57  
58  
59  
60

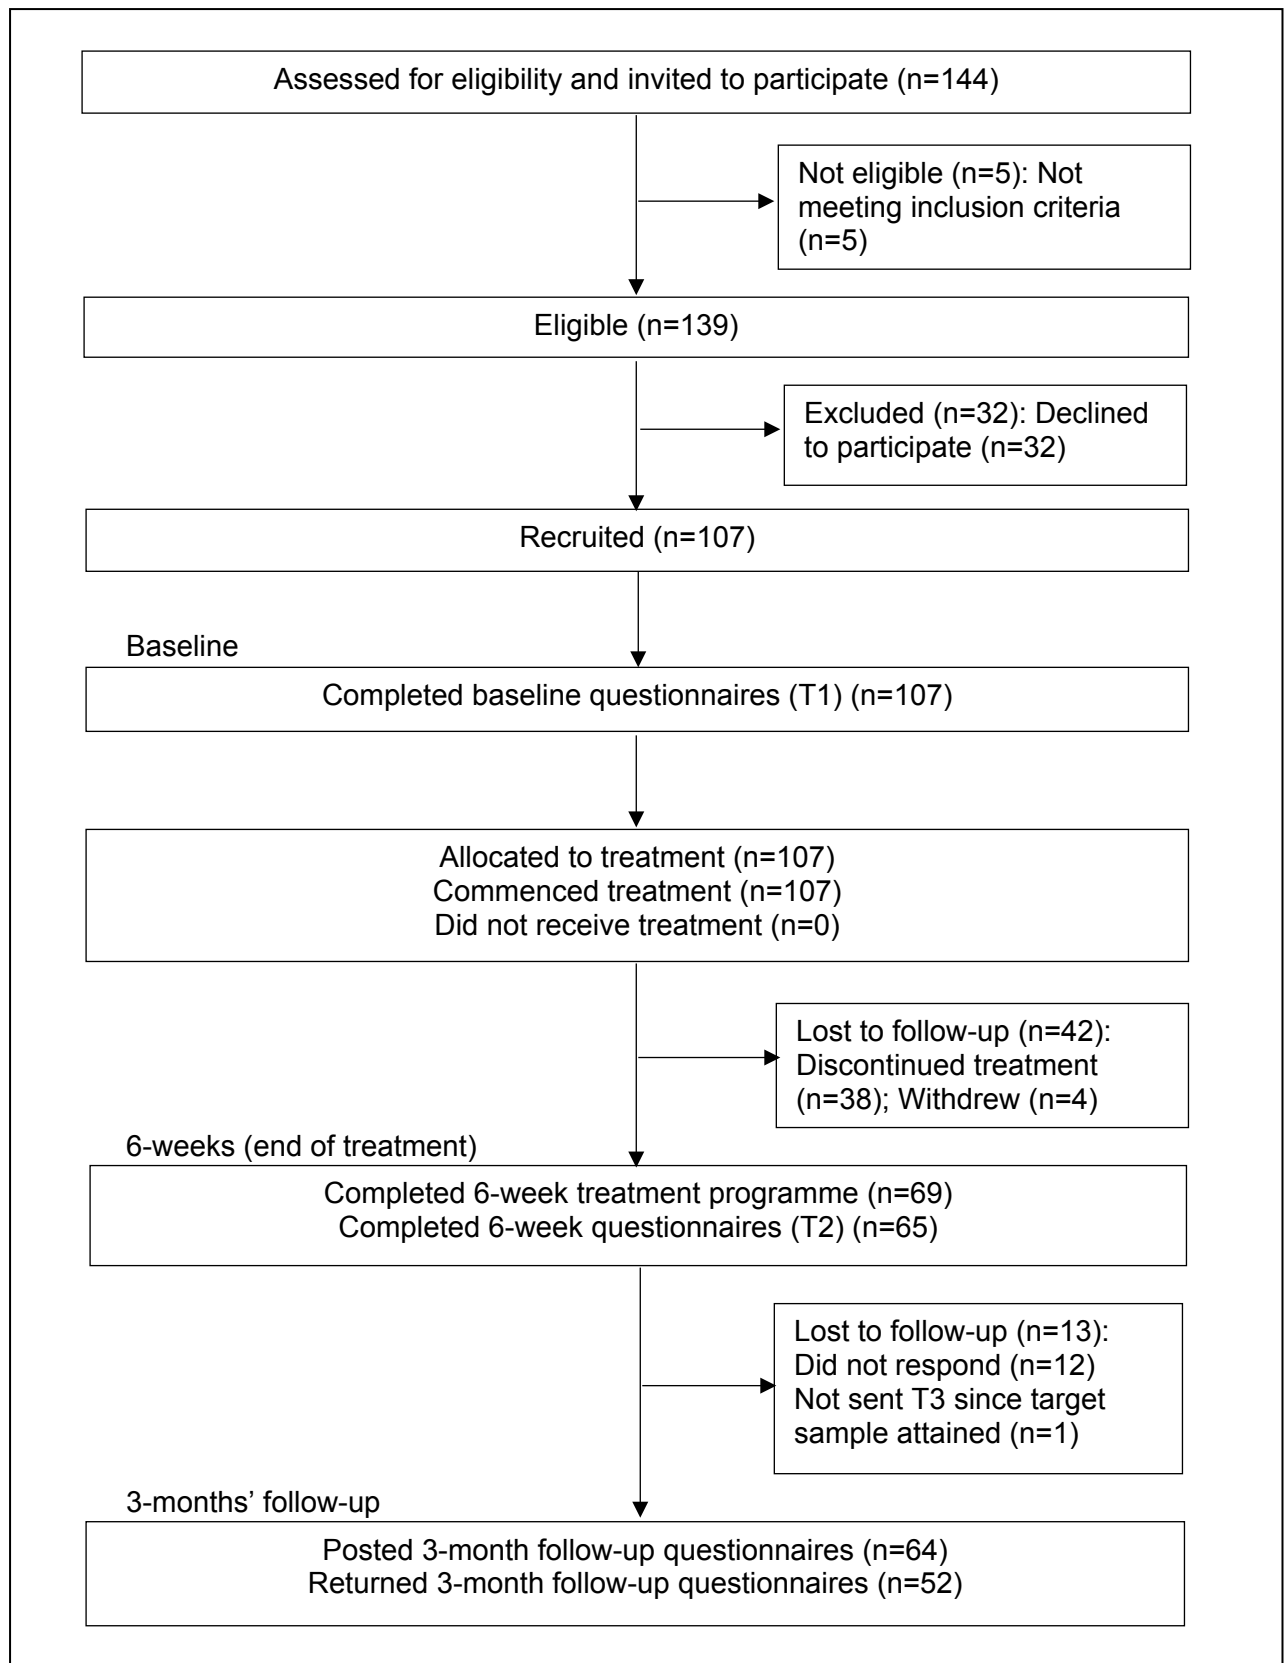

Figure 2: CONSORT diagram showing the flow of participants through the study

1  
2  
3  
4 T2: "The pace and content has been good for me. It has helped me to focus on  
5 my belief that I have to own the situation, to be positive and to make use of the  
6 tools we have discussed. If I don't take this approach I believe my situation will  
7 not improve. There is no magic wand, but I can be the difference." (F070:  
8

9 *Fibromyalgia*  
10  
11  
12

13  
14 T3: "I have found pacing really helpful in my everyday life and feel I can achieve  
15 more day to day than 12 months ago." (F006: *chronic widespread pain,*  
16 *fibromyalgia, chronic fatigue syndrome/myalgic encephalomyelitis*)  
17  
18  
19

20  
21 T3: "I found the pain service very helpful and informative. How I view my pain and  
22 react to and manage it has improved. Emotionally I feel more positive as a result  
23 of using strategies learned, and also more confident that I can manage my pain  
24 and how it makes me feel. Using pacing and realistic goals has enabled me to do  
25 some activities that I previously avoided i.e. hoovering, changing the bed. (F068:  
26 *fibromyalgia*)  
27  
28  
29  
30  
31

32  
33 T3: "Doing the 6 week course was extremely helpful and gave me some excellent  
34 information and resources to work with. The difficulty has been that there has  
35 been no follow up or support sessions since. It is great having the info, but then  
36 you are battling depression/anxiety it is difficult to apply knowledge without some  
37 support, even if that is over the phone every few weeks or maybe a support group  
38 facility." (F075: *low back pain, chronic widespread pain*)  
39  
40  
41  
42  
43  
44

45 T3 "I have found 'pacing' a very good way to manage pain and get through the  
46 day completing activities" (F105: *low back pain, chronic widespread pain,*  
47 *fibromyalgia*)  
48  
49  
50

51  
52  
53 *Figure 3. Participants' written comments following attending the rehabilitation*  
54 *programme*  
55  
56  
57  
58  
59  
60

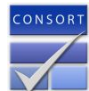

## CONSORT 2010 checklist of information to include when reporting a pilot or feasibility trial\*

| Section/Topic             | Item No | Checklist item                                                                                                                                               | Reported on page No                                                                                                                  |
|---------------------------|---------|--------------------------------------------------------------------------------------------------------------------------------------------------------------|--------------------------------------------------------------------------------------------------------------------------------------|
| <b>Title and abstract</b> |         |                                                                                                                                                              |                                                                                                                                      |
|                           | 1a      | Identification as a pilot or feasibility randomised trial in the title                                                                                       | Title page (Page 1)                                                                                                                  |
|                           | 1b      | Structured summary of pilot trial design, methods, results, and conclusions (for specific guidance see CONSORT abstract extension for pilot trials)          | The abstract is structured as per the <i>BMJ Open</i> format, but it contains the information as per the CONSORT checklist. (Page 3) |
| <b>Introduction</b>       |         |                                                                                                                                                              |                                                                                                                                      |
| Background and objectives | 2a      | Scientific background and explanation of rationale for future definitive trial, and reasons for randomised pilot trial                                       | Pages 5-6                                                                                                                            |
|                           | 2b      | Specific objectives or research questions for pilot trial                                                                                                    | Page 7                                                                                                                               |
| <b>Methods</b>            |         |                                                                                                                                                              |                                                                                                                                      |
| Trial design              | 3a      | Description of pilot trial design (such as parallel, factorial) including allocation ratio                                                                   | Page 7                                                                                                                               |
|                           | 3b      | Important changes to methods after pilot trial commencement (such as eligibility criteria), with reasons                                                     | N/A                                                                                                                                  |
| Participants              | 4a      | Eligibility criteria for participants                                                                                                                        | Pages 8                                                                                                                              |
|                           | 4b      | Settings and locations where the data were collected                                                                                                         | Page 10                                                                                                                              |
|                           | 4c      | How participants were identified and consented                                                                                                               | Page 8                                                                                                                               |
| Interventions             | 5       | The interventions for each group with sufficient details to allow replication, including how and when they were actually administered                        | Pages 9                                                                                                                              |
| Outcomes                  | 6a      | Completely defined prespecified assessments or measurements to address each pilot trial objective specified in 2b, including how and when they were assessed | Pages 10-12                                                                                                                          |

|                                                      |     |                                                                                                                                                                                             |                                                                                                                                     |
|------------------------------------------------------|-----|---------------------------------------------------------------------------------------------------------------------------------------------------------------------------------------------|-------------------------------------------------------------------------------------------------------------------------------------|
|                                                      | 6b  | Any changes to pilot trial assessments or measurements after the pilot trial commenced, with reasons                                                                                        | N/A                                                                                                                                 |
|                                                      | 6c  | If applicable, prespecified criteria used to judge whether, or how, to proceed with future definitive trial                                                                                 | N/A                                                                                                                                 |
| Sample size                                          | 7a  | Rationale for numbers in the pilot trial                                                                                                                                                    | Page 8-9                                                                                                                            |
|                                                      | 7b  | When applicable, explanation of any interim analyses and stopping guidelines                                                                                                                | N/A                                                                                                                                 |
| Randomisation:                                       |     |                                                                                                                                                                                             |                                                                                                                                     |
| Sequence generation                                  | 8a  | Method used to generate the random allocation sequence                                                                                                                                      | N/A                                                                                                                                 |
|                                                      | 8b  | Type of randomisation(s); details of any restriction (such as blocking and block size)                                                                                                      | N/A                                                                                                                                 |
| Allocation concealment mechanism                     | 9   | Mechanism used to implement the random allocation sequence (such as sequentially numbered containers), describing any steps taken to conceal the sequence until interventions were assigned | N/A                                                                                                                                 |
| Implementation                                       | 10  | Who generated the random allocation sequence, who enrolled participants, and who assigned participants to interventions                                                                     | N/A                                                                                                                                 |
| Blinding                                             | 11a | If done, who was blinded after assignment to interventions (for example, participants, care providers, those assessing outcomes) and how                                                    | N/A                                                                                                                                 |
|                                                      | 11b | If relevant, description of the similarity of interventions                                                                                                                                 | N/A                                                                                                                                 |
| Statistical methods                                  | 12  | Methods used to address each pilot trial objective whether qualitative or quantitative                                                                                                      | Page 12-13                                                                                                                          |
| <b>Results</b>                                       |     |                                                                                                                                                                                             |                                                                                                                                     |
| Participant flow (a diagram is strongly recommended) | 13a | For each group, the numbers of participants who were approached and/or assessed for eligibility, randomly assigned, received intended treatment, and were assessed for each objective       | Pages 18-19<br>Figure 2:<br>CONSORT<br>flow diagram                                                                                 |
|                                                      | 13b | For each group, losses and exclusions after randomisation, together with reasons                                                                                                            | N/A                                                                                                                                 |
| Recruitment                                          | 14a | Dates defining the periods of recruitment and follow-up                                                                                                                                     | Page 14                                                                                                                             |
|                                                      | 14b | Why the pilot trial ended or was stopped                                                                                                                                                    | Page 14.<br>Figure 2:<br>CONSORT<br>flow diagram<br>states T3<br>(follow up)<br>was stopped<br>due to<br>attaining<br>target sample |

|                          |     |                                                                                                                                                                                |                           |
|--------------------------|-----|--------------------------------------------------------------------------------------------------------------------------------------------------------------------------------|---------------------------|
| Baseline data            | 15  | A table showing baseline demographic and clinical characteristics for each group                                                                                               | Tables 1 and 2            |
| Numbers analysed         | 16  | For each objective, number of participants (denominator) included in each analysis. If relevant, these numbers should be by randomised group                                   | Tables 3-5                |
| Outcomes and estimation  | 17  | For each objective, results including expressions of uncertainty (such as 95% confidence interval) for any estimates. If relevant, these results should be by randomised group | Tables 3-5                |
| Ancillary analyses       | 18  | Results of any other analyses performed that could be used to inform the future definitive trial                                                                               | Tables 4-5                |
| Harms                    | 19  | All important harms or unintended effects in each group (for specific guidance see CONSORT for harms)                                                                          | Page 19                   |
|                          | 19a | If relevant, other important unintended consequences                                                                                                                           | N/A                       |
| <b>Discussion</b>        |     |                                                                                                                                                                                |                           |
| Limitations              | 20  | Pilot trial limitations, addressing sources of potential bias and remaining uncertainty about feasibility                                                                      | 37-38                     |
| Generalisability         | 21  | Generalisability (applicability) of pilot trial methods and findings to future definitive trial and other studies                                                              | 37-38                     |
| Interpretation           | 22  | Interpretation consistent with pilot trial objectives and findings, balancing potential benefits and harms, and considering other relevant evidence                            | Pages 33-37               |
|                          | 22a | Implications for progression from pilot to future definitive trial, including any proposed amendments                                                                          | 38                        |
| <b>Other information</b> |     |                                                                                                                                                                                |                           |
| Registration             | 23  | Registration number for pilot trial and name of trial registry                                                                                                                 | Abstract (Page 4); Page 7 |
| Protocol                 | 24  | Where the pilot trial protocol can be accessed, if available                                                                                                                   | Page 7                    |
| Funding                  | 25  | Sources of funding and other support (such as supply of drugs), role of funders                                                                                                | Page 39                   |
|                          | 26  | Ethical approval or approval by research review committee, confirmed with reference number                                                                                     | Page 7                    |

Citation: Eldridge SM, Chan CL, Campbell MJ, Bond CM, Hopewell S, Thabane L, et al. CONSORT 2010 statement: extension to randomised pilot and feasibility trials. *BMJ*. 2016;355.

\*We strongly recommend reading this statement in conjunction with the CONSORT 2010, extension to randomised pilot and feasibility trials, Explanation and Elaboration for important clarifications on all the items. If relevant, we also recommend reading CONSORT extensions for cluster randomised trials, non-inferiority and equivalence trials, non-pharmacological treatments, herbal interventions, and pragmatic trials. Additional extensions are forthcoming: for those and for up to date references relevant to this checklist, see [www.consort-statement.org](http://www.consort-statement.org).

# BMJ Open

## Testing a newly developed activity pacing framework for chronic pain/fatigue: a feasibility study

|                                 |                                                                                                                                                                                                                                                                                                                                                                                                                                                                                                                                                                                                                                                   |
|---------------------------------|---------------------------------------------------------------------------------------------------------------------------------------------------------------------------------------------------------------------------------------------------------------------------------------------------------------------------------------------------------------------------------------------------------------------------------------------------------------------------------------------------------------------------------------------------------------------------------------------------------------------------------------------------|
| Journal:                        | <i>BMJ Open</i>                                                                                                                                                                                                                                                                                                                                                                                                                                                                                                                                                                                                                                   |
| Manuscript ID                   | bmjopen-2020-045398.R1                                                                                                                                                                                                                                                                                                                                                                                                                                                                                                                                                                                                                            |
| Article Type:                   | Original research                                                                                                                                                                                                                                                                                                                                                                                                                                                                                                                                                                                                                                 |
| Date Submitted by the Author:   | 05-May-2021                                                                                                                                                                                                                                                                                                                                                                                                                                                                                                                                                                                                                                       |
| Complete List of Authors:       | Antcliff, Deborah; Northern Care Alliance NHS Group, Physiotherapy Department, Fairfield General Hospital; University of Leeds Faculty of Medicine and Health, School of Healthcare<br>Keenan, Anne-Maree; University of Leeds Faculty of Medicine and Health, School of Healthcare; NIHR Leeds Musculoskeletal Biomedical Research Unit<br>Keeley, Philip; Keele University School of Nursing and Midwifery<br>Woby, Steve ; Northern Care Alliance NHS Group Research and Innovation Department; University of Salford School of Health and Society<br>McGowan, Linda; University of Leeds Faculty of Medicine and Health, School of Healthcare |
| <b>Primary Subject Heading</b>: | Rehabilitation medicine                                                                                                                                                                                                                                                                                                                                                                                                                                                                                                                                                                                                                           |
| Secondary Subject Heading:      | Rehabilitation medicine                                                                                                                                                                                                                                                                                                                                                                                                                                                                                                                                                                                                                           |
| Keywords:                       | PAIN MANAGEMENT, REHABILITATION MEDICINE, Musculoskeletal disorders < ORTHOPAEDIC & TRAUMA SURGERY                                                                                                                                                                                                                                                                                                                                                                                                                                                                                                                                                |
|                                 |                                                                                                                                                                                                                                                                                                                                                                                                                                                                                                                                                                                                                                                   |

SCHOLARONE™  
Manuscripts





I, the Submitting Author has the right to grant and does grant on behalf of all authors of the Work (as defined in the below author licence), an exclusive licence and/or a non-exclusive licence for contributions from authors who are: i) UK Crown employees; ii) where BMJ has agreed a CC-BY licence shall apply, and/or iii) in accordance with the terms applicable for US Federal Government officers or employees acting as part of their official duties; on a worldwide, perpetual, irrevocable, royalty-free basis to BMJ Publishing Group Ltd ("BMJ") its licensees and where the relevant Journal is co-owned by BMJ to the co-owners of the Journal, to publish the Work in this journal and any other BMJ products and to exploit all rights, as set out in our [licence](#).

The Submitting Author accepts and understands that any supply made under these terms is made by BMJ to the Submitting Author unless you are acting as an employee on behalf of your employer or a postgraduate student of an affiliated institution which is paying any applicable article publishing charge ("APC") for Open Access articles. Where the Submitting Author wishes to make the Work available on an Open Access basis (and intends to pay the relevant APC), the terms of reuse of such Open Access shall be governed by a Creative Commons licence – details of these licences and which [Creative Commons](#) licence will apply to this Work are set out in our licence referred to above.

Other than as permitted in any relevant BMJ Author's Self Archiving Policies, I confirm this Work has not been accepted for publication elsewhere, is not being considered for publication elsewhere and does not duplicate material already published. I confirm all authors consent to publication of this Work and authorise the granting of this licence.

1  
2  
3 **Title: Testing a newly developed activity pacing framework for chronic**  
4 **pain/fatigue: a feasibility study**  
5  
6  
7  
8  
9

10 **AUTHORS**  
11

12 Dr Deborah Antcliff (PhD)<sup>a,b</sup>  
13

14 <sup>a</sup>Physiotherapy Department, Bury and Rochdale Care Organisation, Northern Care  
15 Alliance NHS Group, Bury, United Kingdom.  
16  
17

18 <sup>b</sup>School of Healthcare, University of Leeds, Leeds, United Kingdom.  
19  
20  
21  
22

23  
24 Professor Anne-Maree Keenan (PhD)<sup>b,c</sup>  
25

26 <sup>b</sup>School of Healthcare, University of Leeds, Leeds, United Kingdom  
27  
28

29 <sup>c</sup>NIHR Leeds Biomedical Research Centre, Leeds, England, UK  
30  
31  
32

33 Professor Philip Keeley (PhD)<sup>d</sup>  
34

35 <sup>d</sup>School of Nursing and Midwifery, Keele University, Keele, United Kingdom  
36  
37  
38  
39

40 Professor Steve Woby (PhD)<sup>e,f,g</sup>  
41

42 <sup>e</sup>Research and Innovation Department, Northern Care Alliance NHS Group, Salford,  
43 United Kingdom.  
44  
45

46 <sup>f</sup>School of Health and Society, University of Salford, Salford, United Kingdom.  
47  
48

49 <sup>g</sup>Faculty of Science and Engineering, Manchester Metropolitan University,  
50 Manchester, United Kingdom.  
51  
52  
53

54  
55 Professor Linda McGowan (PhD)<sup>b</sup>  
56

57 <sup>b</sup>School of Healthcare, University of Leeds, Leeds, United Kingdom  
58  
59  
60

**CORRESPONDING AUTHOR**

Dr Deborah Antcliff (PhD)

Physiotherapy Department

Fairfield General Hospital

Bury and Rochdale Care Organisation

Northern Care Alliance NHS Group

Rochdale Old Road

Bury, England

BL9 7TD

United Kingdom

[Deborah.Antcliff@pat.nhs.uk](mailto:Deborah.Antcliff@pat.nhs.uk)

Tel: +44 (0)7769683646

Fax: Nil available

ORCID ID: 0000-0002-9771-8232

Institutional URL: <http://www.leeds.ac.uk/>

Word count: 4,759 words

**KEY WORDS**

Pain management; Rehabilitation medicine, Musculoskeletal disorders

## ABSTRACT

**Objectives:** To test the feasibility of using a new activity pacing framework to standardise healthcare professionals' instructions of pacing, and explore whether measures of pacing/symptoms detected changes following treatment.

**Design:** Single-arm, repeated measures study.

**Setting:** A single NHS Pain Service in Northern England, U.K.

**Participants:** Adult patients with chronic pain/fatigue, including chronic low back pain, chronic widespread pain, fibromyalgia and chronic fatigue syndrome/myalgic encephalomyelitis.

**Interventions:** Six-week rehabilitation programme, standardised using the activity pacing framework.

**Outcome measures:** Feasibility was explored via patients' recruitment/attrition rates, adherence and satisfaction, and healthcare professionals' fidelity.

Questionnaire data were collected from patients at the start and end of the six-week programme (T1/T2) and three months' follow-up (T3). Questionnaires included measures of activity pacing, current/usual pain, physical/mental fatigue, depression, anxiety, self-efficacy, avoidance, physical/mental function and quality of life. Mean changes and relationships between pacing and symptoms (T1-T2/T1-T3) were estimated.

**Results:** Of the 139 eligible patients, 107 patients consented (recruitment rate=77%); 65 patients completed T2 (T1-T2 attrition rate=39%), and 52 patients completed T3 (T1-T3 attrition rate=51%). At T2, patients' satisfaction ratings averaged 9/10, and 89% attended  $\geq 5$  sessions. Activity pacing and all symptoms improved between T1-T2, with smaller improvements maintained at T3. Between T1-

1  
2  
3 T2, changes in pacing significantly correlated with current pain ( $r_s=-0.29$ ,  $p=0.019$ ),  
4 self-efficacy ( $r_s=0.26-0.39$ ,  $p<0.05$ ) and mental function ( $r_s=0.27-0.28$ ,  $p<0.05$ ).  
5  
6

7  
8 Between T1-T3, there were additional significant correlations between changes in  
9  
10 pacing and physical/mental fatigue, depression, anxiety and quality of life ( $p<0.05$ ).  
11

12 There were no significant correlations with physical function/avoidance.  
13

14 **Conclusion:** The activity pacing framework was feasible to implement and patients'  
15 ability to pace and manage their symptoms improved. Future work will employ a  
16 suitable comparison group and test the framework across wider settings to explore  
17 the effects of activity pacing in a randomised controlled trial.  
18  
19  
20  
21  
22

23 **Trial registration:** ClinicalTrials.gov:NCT03497585  
24

25 **Funding:** Health Education England/National Institute for Health Research  
26  
27  
28  
29

### 30 **STRENGTHS AND LIMITATIONS OF THIS STUDY**

31  
32  
33  
34

- 35 • This was the first study to test the feasibility of using a newly developed  
36 activity pacing framework in a rehabilitation programme to standardise the  
37 clinical instructions of activity pacing to patients with chronic pain/fatigue.  
38
- 39 • This feasibility study recruited to target with satisfactory recruitment/attrition  
40 rates which form the basis of a future randomised controlled trial (RCT).  
41
- 42 • A comprehensive measure of pacing: the activity pacing questionnaire (APQ-  
43 28), and range of validated psychometric measures were suitable to detect  
44 changes before and after treatment.  
45
- 46 • This study was not powered with a control arm to determine treatment  
47 effectiveness, and the exploratory statistical analyses do not indicate  
48 causation between increased activity pacing and improved symptoms.  
49  
50  
51  
52  
53  
54  
55  
56  
57  
58  
59  
60

- The generalisability of this study is limited to a sample of predominantly females, of white ethnic origin, and from a single Pain Service.

## INTRODUCTION

Activity pacing is a principal coping strategy for patients with long-term conditions, including chronic low back pain, chronic widespread pain, fibromyalgia and chronic fatigue syndrome/myalgic encephalomyelitis (CFS/ME),[1-5]. Chronic pain and chronic fatigue are known to co-exist,[6, 7] and overlap in symptoms, including depression, anxiety and disability,[8-11]. Conditions of chronic pain/fatigue may share similar disease processes: physical deconditioning following under-activity/avoidance, pathophysiological/psychological processes and central sensitisation,[11-16]. Treatments aim to reverse some of these processes: to improve physical/mental functioning, increase tolerance and improve quality of life,[12, 15, 17]. Recommended treatments include psychological therapies (for example, cognitive behavioural therapy) and graded exposure to activity/exercise,[15, 16]; of which activity pacing is a key component,[18-20].

Patients with chronic pain/fatigue may present with altered behaviours, including underactivity or avoidance of activities that are perceived as harmful or that may exacerbate symptoms; over-activity or excessive persistence to push through/distract from symptoms; or fluctuations between underactivity-overactivity,[21]. Activity pacing provides an alternative behaviour to enable patients to (re-)engage with activities in a manner that encourages their progression towards more regular or improved functioning,[4, 22, 23].

1  
2  
3  
4  
5 At present, there remains confusion regarding how activity pacing is defined or  
6 interpreted, and the effects on patients' symptoms,[5, 24, 25]. There is no widely-  
7  
8 used guide to standardise how healthcare professionals instruct pacing to patients;  
9  
10 and uncertainty whether different methods are required for symptoms of chronic pain  
11  
12 versus chronic fatigue,[3, 26]. This poses challenges how to advise patients with  
13  
14 both chronic pain and fatigue.  
15  
16  
17  
18  
19  
20

21 We have developed an activity pacing framework using an inclusive approach for  
22 patients who present at rehabilitation services with chronic pain and/or fatigue. Using  
23 the Medical Research Council guidelines for developing complex interventions,  
24 mixed methods were implemented to encompass theoretical and stakeholder  
25 standpoints,[27]. Mixed methods comprise of quantitative and qualitative approaches  
26 to collecting and analysing data,[28]. Stage I: Healthcare professionals' survey  
27 gathered opinions on activity pacing (n=92),[4]. These findings, together with existing  
28 research formed the first draft of the framework and accompanying appendices.  
29  
30 Stage II: Nominal group technique refined the activity pacing framework using a  
31 consensus meeting between patients and healthcare professionals (n=10),[29].  
32  
33 During the development of the activity pacing framework, stakeholders included  
34 healthcare professionals and patients with the aim of increasing the clinical utility and  
35 acceptability of the framework. (See *Supplementary Figure 1. Content of the Activity*  
36  
37 *Pacing Framework: Theory and Overview, and Appendices and Teaching Guide*  
38  
39 *booklets.*)  
40  
41  
42  
43  
44  
45  
46  
47  
48  
49  
50  
51  
52  
53  
54  
55  
56  
57  
58  
59  
60

1  
2  
3 The conceptual model of the activity pacing framework (see *Figure 1*) follows  
4 principles of quota-contingency and the operant approach (for example, setting goals  
5 according to time/distance/activity). The activity pacing framework is underpinned by  
6 concepts of rehabilitation with aims of improving physical and cognitive function; and  
7 engagement in, and satisfaction with meaningful activities, while managing  
8 symptoms,[4, 29]. The activity pacing framework includes the potential for  
9 reversibility of some of the consequences of chronic pain/fatigue, such as the  
10 potential to reduce levels of disability. Together with containing themes of adjusting  
11 activities, planning and consistency, the activity pacing framework also includes  
12 themes of progression regarding the amount and/or variety of activities. Therefore,  
13 the activity pacing framework is considered to be a rehabilitative approach that  
14 moves forward from only adapting, or in some cases mal-adapting to the long-term  
15 condition. The activity pacing framework differs from energy conservation/adaptive  
16 pacing approaches which involve undertaking activities according to symptom  
17 severity (symptom-contingency) with an aim of reducing or avoiding symptoms,[30,  
18 31]. Within the current activity pacing framework, quota-contingency is advised  
19 alongside concepts of flexibility and choice to enable relevance and sustainability in  
20 conditions where symptoms may vary. The framework refers to all types of activities  
21 including work, household activities, cognitive activities, physical activities, exercise  
22 and relaxation to increase its wider relevance for patients with chronic pain and/or  
23 fatigue, for varying abilities and behaviours.

24  
25  
26  
27  
28  
29  
30  
31  
32  
33  
34  
35  
36  
37  
38  
39  
40  
41  
42  
43  
44  
45  
46  
47  
48  
49  
50  
51  
52  
53  
54 The aim of this study was to test the feasibility of using the activity pacing framework  
55 to underpin a rehabilitation programme for chronic pain/fatigue. To inform a future  
56 definitive trial, specific objectives included: (1) Exploring participant  
57  
58  
59  
60



1  
2  
3 recruitment/attrition rates and adherence/acceptability (for both chronic pain and  
4 fatigue); (2) Exploring healthcare professionals' fidelity to the framework; (3) Exploring  
5 the suitability of the outcome measures, including the modified activity pacing  
6 questionnaire (APQ-28); and (4) Exploring associations between changes in activity  
7 pacing and self-reported symptoms.  
8  
9  
10  
11  
12  
13  
14  
15  
16

## 17 **METHODS**

### 18 **Study design**

19  
20  
21  
22  
23  
24  
25  
26  
27 This single-arm, repeated measures study is reported as a non-randomised  
28 feasibility study using the extended CONSORT guidelines,[32, 33] (See  
29 *Supplementary Table 1*). Quantitative questionnaire data were collected from  
30 patients at the start (T1) and end (T2) of the six-week rehabilitation programme, and  
31 at three month's follow-up (T3). The study was prospectively registered (protocol  
32 available at ClinicalTrials.gov: NCT03497585). Ethical approval was granted by the  
33 London-Surrey Research Ethics Committee (18/LO/0655). The acceptability of the  
34 framework, explored via interviews with patients and healthcare professionals is  
35 reported elsewhere [*Antcliff et al., 2021 accepted for publication*].  
36  
37  
38  
39  
40  
41  
42  
43  
44  
45  
46  
47  
48  
49

### 50 **Participant recruitment**

51  
52  
53  
54 Participants were identified from consecutive referrals to a rehabilitation programme  
55 for chronic pain/fatigue in a Pain Service in Northern England, United Kingdom. All  
56 patients attended a minimum of one face-to-face appointment before referral to the  
57  
58  
59  
60

1  
2  
3 programme. Participants received the study information via the post one week before  
4 attending the programme and/or during the first session of the programme. The  
5 consent form was completed either at home or during the first session.  
6  
7  
8  
9  
10

## 11 **Eligibility criteria**

12  
13  
14  
15  
16  
17 Eligible patients were aged  $\geq 18$  years, with symptoms for  $\geq 3$  months and with a  
18 general practitioner or hospital consultant diagnosis of chronic low back pain, chronic  
19 widespread pain, fibromyalgia or CFS/ME. Patients were required to read and write  
20 in English. Ineligible patients were those with evidence of a serious underlying  
21 pathology, such as a current diagnosis of cancer, or patients with severe mental  
22 health or cognitive functioning issues.  
23  
24  
25  
26  
27  
28  
29  
30  
31  
32

## 33 **Sample size**

34  
35  
36  
37 A sample size of 50 patients has been recommended for feasibility studies to enable  
38 estimates of recruitment/attrition, means/standard deviations and changes in means  
39 to prepare for future clinical trials,[34]. To attain a sample of 50 participants at T3, it  
40 was estimated that 340 patients may need to be approached to allow for a 50%  
41 recruitment rate at T1, a 40% attrition rate between T1-T2 and a 50% return rate at  
42 T3.  
43  
44  
45  
46  
47  
48  
49  
50  
51  
52

## 53 **Existing rehabilitation programme**

1  
2  
3 The existing rehabilitation programme comprised of six consecutive weekly sessions  
4 (each 3.5 hours) delivered by healthcare professionals (pain specialist  
5  
6 physiotherapists and psychological wellbeing practitioners). The programme  
7  
8 included understanding complex symptoms, sleep hygiene, graded exercise, goal  
9  
10 setting, relaxation and mindfulness. Pacing was instructed in one session but was  
11  
12 not informed by any particular framework.  
13  
14  
15  
16  
17  
18

### 19 **Activity pacing framework standardised programme**

20  
21  
22

23  
24 The existing six-week programme was modified through re-structuring and  
25  
26 standardisation using the activity pacing framework. Activity pacing was formally  
27  
28 instructed on two sessions (weeks 2-3). However, activity pacing was referenced  
29  
30 throughout the programme in relation to other coping strategies, for example, how  
31  
32 activity pacing can assist graded exercise (weeks 1-5) or set-back management  
33  
34 (week 6). Practical exercises included completing an activity diary to discuss  
35  
36 patients' activity patterns and setting goals in which activity pacing could be  
37  
38 practised. (*See Supplementary Figure 2. Content of the rehabilitation programme*).  
39  
40  
41  
42 Patients received a handout to summarise the key concepts of activity pacing. The  
43  
44 healthcare professionals (as above) received training on the framework during a half-  
45  
46 day session and could contact the lead researcher (DA) for any queries. All patients  
47  
48 attended the standardised programme, but patients chose whether to participate in  
49  
50 the study through their optional completion of the study questionnaires and consent  
51  
52 form.  
53  
54  
55  
56  
57  
58  
59  
60

## Data collection

## Feasibility outcomes

Measures of feasibility included participant recruitment/attrition rates, adherence (number of sessions attended), acceptability (two satisfaction rating scales regarding the programme content and length where 0=dissatisfied and 10=fully satisfied), and missing data in the questionnaire. For every programme, healthcare professionals completed a 13-item fidelity checklist based on the conceptual model of the activity pacing framework to ensure their inclusion of key elements from the framework. Each clinician was observed once by the lead researcher.

## Clinical measures

The self-reported questionnaire booklets (T1, T2 and T3) included standardised clinical measures. T1 could be completed during session one or at home, T2 could be completed during session six, and T3 was sent in the post to be completed at home. Telephone reminders were made if the T3 questionnaires were not returned within two weeks. The T1 booklet contained demographic questions, in addition to following measures included in T2 and T3:

(1) Activity pacing was measured using the Activity Pacing Questionnaire (APQ-28).

The APQ 26-item version was initially validated among patients with chronic pain/fatigue and contained five subthemes: Activity adjustment, Activity planning, Activity consistency, Activity acceptance and Activity progression (Cronbach's

1  
2  
3 alpha=0.72-0.92),[35]. (See Supplementary Table 2. Five themes of the activity  
4 *pacing questionnaire (APQ) with examples.*) Each item is scored between 0='never  
5 did this' and 4='always did this'. Two items have been added that correspond to  
6 important aspects of pacing that emerged during the development of the activity  
7 pacing framework. The new items: APQ12:"I found a baseline amount of activities  
8 that I could do on 'good' and 'bad' days" and APQ15:"I had a flexible approach with  
9 my activities" were added to the subthemes of best conceptual fit (Activity  
10 adjustment and Activity acceptance respectively). Each subtheme was calculated as  
11 a mean score. The APQ-28 subthemes, similarly to the following scales, permitted  
12 one missing item per subscale.  
13  
14  
15  
16  
17  
18  
19  
20  
21  
22  
23  
24  
25  
26  
27  
28  
29  
30  
31  
32  
33  
34  
35  
36  
37  
38  
39  
40  
41  
42  
43  
44  
45  
46  
47  
48  
49  
50  
51  
52  
53  
54  
55  
56  
57  
58  
59  
60

(2) Current and usual pain were measured using two 11-point numerical rating scales (NRS), where 0='no pain' and 10='worst possible pain',[36].

(3) Physical fatigue (seven items) and mental fatigue (four items) were measured using the Chalder Fatigue Questionnaire (CFQ), where scores of 1='much worse than usual' and 4='better than usual',[37]. Two subscale scores were summated where higher scores indicated less fatigue.

(4) Depression was measured using the nine item Patient Health Questionnaire (PHQ-9), the items of which are based on the Diagnostic and Statistical Manual of Mental Disorders 4th Edition (DSM-IV),[38]. Items were rated between 0='not at all' and 3='nearly everyday'. Total scores of 1-4=minimal depression, 5-9=mild depression, 10-14=moderate depression and  $\geq 15$ =severe depression,[38, 39].

1  
2  
3 (5) Anxiety was measured using the seven-item Generalised Anxiety Disorder  
4  
5 Assessment (GAD-7). Items were rated between 0='not at all' and 3='nearly  
6  
7 everyday'. Total scores of 5-9=mild anxiety, 10-14=moderate anxiety and  
8  
9  $\geq 15$ =severe anxiety,[40].  
10  
11  
12  
13

14 (6) Self-efficacy was measured using the 10-item Pain Self-Efficacy Questionnaire  
15  
16 (PSEQ) where items were rated between 0='not at all confident' and 6='completely  
17  
18 confident'. Total scores of  $PSEQ \geq 40$  indicate those patients who are more likely to  
19  
20 continue implementing coping strategies/behavioural changes, and  $PSEQ \leq 16$  are  
21  
22 considered low,[41].  
23  
24  
25  
26  
27

28 (7) Avoidance was measured using the 'Escape and Avoidance' subscale of the Pain  
29  
30 Anxiety Symptoms Scale-short version (PASS-20),[42]. The five items were rated  
31  
32 between 0='never' and 5='always' where higher total scores indicated greater  
33  
34 avoidance.  
35  
36  
37  
38  
39

40 (8) Physical and mental function were measured using the 12-Item Short-Form  
41  
42 Health Survey (SF-12). Two subscale scores (out of 100) were calculated using the  
43  
44 SF-12 software (Version 2; one-week recall) where higher scores indicated better  
45  
46 function,[43].  
47  
48  
49  
50

51 (9) Health-related quality of life was measured using the EQ-5D-5L (EuroQol). The  
52  
53 EQ-5D-5L was calculated as an index score,[44, 45].  
54  
55  
56  
57  
58  
59  
60

## Data analysis

Feasibility outcomes and participants' demographics were analysed using descriptive statistics. Clinical outcomes were estimated as changes in activity pacing and symptoms between T1-T2, T2-T3 and T1-T3 (mean change, 95% confidence intervals), and exploratory analyses of correlations between changes in activity pacing and symptoms (T1-T2/T1-T3). The validity of the modified APQ-28 was estimated using Cronbach's alpha and item correlations; and sensitivity analyses explored the effects of including two new APQ items. Data were analysed using IBM SPSS Statistics 26 statistical software (IBM Corp, Armonk, New York).

## Patient and Public Involvement

Patient and Public Involvement (PPI) commenced during the initial planning stages of the mixed methods programme to develop and test the activity pacing framework. A meeting with five PPI representatives discussed the study purpose and practical issues around the proposed methods (online survey, nominal group technique, and feasibility and acceptability studies). PPI guided on improving the accessibility of patients' participation and reducing burden (for example, location and duration of meetings). A PPI representative has acted as an advisor on the study, involving commenting on study documents/questionnaire booklets and coding qualitative interviews. Acceptability interviews with patients explored practical issues surrounding the feasibility study [Antcliff et al., 2021 accepted for publication] which will further assist the planning of a future activity pacing randomised controlled trial (RCT).

## RESULTS

Recruitment and T1 data collection commenced in May 2018 and T3 data collection ended in December 2019 due to attaining the target sample.

### Demographics

Among the 107 participants who completed the baseline (T1) measures, participants were predominantly female (n=92, 86.0%) with a mean age of 55.25 +/- 12.83 years. Low back pain was most frequently reported (n=79, 73.8%) and CFS/ME least frequently reported (n=12, 11.2%). Sixty-five participants (61.3%) reported two or more conditions of chronic pain and/or fatigue. Of the 12 participants with CFS/ME, 10 participants reported CFS/ME as their main condition, and 11 reported at least one co-morbidity of LBP (n=7), chronic widespread pain (n=6), fibromyalgia (n=7) or another condition (n=3). (See Table 1 for participant demographics and Table 2 for baseline scores for activity pacing and symptoms.)

**Table 1. Participant demographics at baseline (T1)**

|               | Participants who completed T1 but not T2 | Participants who completed T1 and T2 | Total      |
|---------------|------------------------------------------|--------------------------------------|------------|
| <b>Gender</b> | (n=42)                                   | (n=65)                               | (n=107)    |
| Male          | 6 (14.3%)                                | 9 (13.8%)                            | 15 (14.0%) |
| Female        | 36 (85.7%)                               | 56 (86.2%)                           | 92 (86.0%) |



|                                                           |                                    |                                    |                                     |
|-----------------------------------------------------------|------------------------------------|------------------------------------|-------------------------------------|
| <b>Age (years)</b>                                        | (n=41)<br>Mean=56.07<br>(SD=13.85) | (n=65)<br>Mean=54.74<br>(SD=12.22) | (n=106)<br>Mean=55.25<br>(SD=12.83) |
| <b>Ethnicity</b>                                          | (n=41)                             | (n=65)                             | (n=106)                             |
| White (British, Irish, Other)                             | 39 (95.1%)                         | 60 (92.3%)                         | 99 (93.4%)                          |
| Black (Caribbean, African)                                | 0 (0.0%)                           | 1 (1.5%)                           | 1 (0.9%)                            |
| Mixed (white/black, white/Asian, other)                   | 1 (2.4%)                           | 2 (3.1%)                           | 3 (2.8%)                            |
| Asian (Indian, Pakistani, Bangladeshi, other)             | 1 (2.4%)                           | 2 (3.1%)                           | 3 (2.8%)                            |
| Asian Eastern (Chinese, other)                            | 0 (0.0%)                           | 0 (0.0%)                           | 0 (0.0%)                            |
| <b>Living situation*</b>                                  | (n=42)                             | (n=65)                             | (n=107)                             |
| Lives alone                                               | 7 (16.7%)                          | 10 (15.4%)                         | 17 (15.9%)                          |
| Lives with partner                                        | 25 (59.5%)                         | 48 (73.8%)                         | 73 (68.2%)                          |
| Lives with children                                       | 16 (38.1%)                         | 24 (36.9%)                         | 40 (37.4%)                          |
| Other                                                     | 2 (4.8%)                           | 1 (1.5%)                           | 3 (2.8%)                            |
| <b>Employment</b>                                         | (n=42)                             | (n=65)                             | (n=107)                             |
| Working (full-time, part-time, in the house, student)     | 13 (31.0%)                         | 31 (47.7%)                         | 44 (41.1%)                          |
| Not working (due to chronic pain/fatigue/other condition) | 15 (35.7%)                         | 19 (29.2%)                         | 34 (31.8%)                          |

|                                                                 |                         |                          |                          |
|-----------------------------------------------------------------|-------------------------|--------------------------|--------------------------|
| Retired/semi-retired                                            | 14 (33.3%)              | 14 (21.5%)               | 28 (26.2%)               |
| Other                                                           | 0 (0.0%)                | 1 (1.5%)                 | 1 (0.9%)                 |
| <b>Conditions*:</b>                                             | (n=41)                  | (n=65)                   | (n=106)                  |
| Low back pain                                                   | 30 (73.2%)              | 49 (75.4%)               | 79 (74.5%)               |
| Widespread pain                                                 | 19 (46.3%)              | 33 (50.8%)               | 52 (49.1%)               |
| Fibromyalgia                                                    | 9 (22.0%)               | 20 (30.8%)               | 29 (27.4%)               |
| CFS/ME                                                          | 6 (14.6%)               | 6 (9.2%)                 | 12 (11.3%)               |
| Other                                                           | 9 (22.0%)               | 12 (18.5%)               | 21 (19.8%)               |
| <b>Number of the above conditions (multiple comorbidities):</b> | (n=41)                  | (n=65)                   | (n=106)                  |
| 1                                                               | 17 (41.5%)              | 24 (36.9%)               | 41 (38.7%)               |
| 2                                                               | 19 (46.3%)              | 30 (46.2%)               | 49 (46.2%)               |
| 3                                                               | 3 (7.3%)                | 9 (13.8%)                | 12 (11.3%)               |
| 4                                                               | 1 (2.4%)                | 1 (1.5%)                 | 2 (1.9%)                 |
| 5                                                               | 1 (2.4%)                | 1 (1.5%)                 | 2 (1.9%)                 |
| <b>Duration of participants' main condition (years)</b>         | (n=35)                  | (n=61)                   | (n=96)                   |
|                                                                 | Mean=10.23<br>(SD=9.49) | Mean=12.94<br>(SD=11.36) | Mean=11.95<br>(SD=10.74) |

\*Patients could select more than one answer.

**Table 2. Baseline scores for activity pacing and symptoms for all patients completing the baseline questionnaires (T1)**

| <b>Measures (range of scores)</b> | <b>Baseline scores for those completed T1 but not T2: Mean (SD)</b> | <b>Baseline scores for those completed T1 and T2: Mean (SD)</b> | <b>Total scores</b>     |
|-----------------------------------|---------------------------------------------------------------------|-----------------------------------------------------------------|-------------------------|
| APQ-28 Activity adjustment (0-4)  | (n=42)<br>1.96 (0.87)                                               | (n=64)<br>1.74 (0.76)                                           | (n=106)<br>1.83 (0.81)  |
| APQ-28 Activity planning (0-4)    | (n=42)<br>1.57 (1.03)                                               | (n=65)<br>1.44 (0.95)                                           | (n=107)<br>1.49 (0.98)  |
| APQ-28 Activity consistency (0-4) | (n=42)<br>1.91 (0.91)                                               | (n=65)<br>1.82 (0.96)                                           | (n=107)<br>1.85 (0.94)  |
| APQ-28 Activity acceptance (0-4)  | (n=42)<br>1.97 (1.02)                                               | (n=65)<br>1.87 (0.84)                                           | (n=107)<br>1.91 (0.92)  |
| APQ-28 Activity progression (0-4) | (n=42)<br>1.59 (1.05)                                               | (n=65)<br>1.45 (0.88)                                           | (n=107)<br>1.51 (0.95)  |
| Current pain (0-10)               | (n=41)<br>6.83 (1.96)                                               | (n=65)<br>6.63 (1.97)                                           | (n=106)<br>6.71 (1.96)  |
| Usual pain (0-10)                 | (n=40)<br>7.72 (1.43)                                               | (n=63)<br>7.30 (1.82)                                           | (n=103)<br>7.47 (1.69)  |
| Physical fatigue (7-28)           | (n=41)<br>14.18 (5.12)                                              | (n=62)<br>15.22 (4.10)                                          | (n=103)<br>14.81 (4.54) |
| Mental fatigue (4-16)             | (n=42)<br>14.18 (5.12)                                              | (n=64)<br>15.22 (4.10)                                          | (n=106)<br>14.81 (4.54) |

|                           |                         |                         |                          |
|---------------------------|-------------------------|-------------------------|--------------------------|
|                           | 8.79 (3.22)             | 8.86 (2.77)             | 8.83 (2.94)              |
| Depression (0-27)         | (n=40)<br>12.63 (7.61)  | (n=64)<br>13.66 (6.38)  | (n=104)<br>13.26 (6.86)  |
| Anxiety (0-21)            | (n=41)<br>9.86 (6.64)   | (n=65)<br>9.91 (5.47)   | (n=106)<br>9.89 (5.92)   |
| Self-efficacy (0-60)      | (n=42)<br>26.26 (13.85) | (n=65)<br>25.29 (10.60) | (n=107)<br>25.67 (11.93) |
| Avoidance (0-25)          | (n=42)<br>12.95 (6.74)  | (n=64)<br>13.27 (5.49)  | (n=106)<br>13.14 (5.98)  |
| Physical function (0-100) | (n=42)<br>33.67 (9.75)  | (n=63)<br>34.15 (8.23)  | (n=105)<br>33.96 (8.82)  |
| Mental function (0-100)   | (n=42)<br>42.22 (11.51) | (n=63)<br>38.52 (11.10) | (n=105)<br>40.00 (11.36) |
| Quality of life (0-1)     | (n=40)<br>0.41 (0.26)   | (n=60)<br>0.43 (0.25)   | (n=100)<br>0.42 (0.25)   |

*Activity pacing (Activity Pacing Questionnaire-28, APQ-28), Pain (Numerical Rating Scale 0-10), Physical/mental fatigue (Chalder Fatigue Questionnaire), Depression (Patient Health Questionnaire-9), Anxiety (Generalised Anxiety Disorder-7), Self-efficacy (Pain Self-Efficacy Questionnaire), Avoidance (Escape and avoidance subscale of the Pain Anxiety Symptoms Scale-20) Physical/mental function (Short-Form 12), Quality of life (EQ-5D-5L index score)*

### **Feasibility outcomes**

## Recruitment and attrition (Objective 1)

Of the 144 patients invited to participate, 139 were eligible (96.5%). The reasons for ineligibility included: three patients reported only neck pain, one patient reported neck/knee pain and one patient reported thoracic pain. Of the 139 eligible patients, 107 (77.0%) were recruited at T1, 69 (64.5%) completed the six-week programme and 65 (60.7%) completed the T2 measures (attrition rate=39.3%). Fifty-two participants completed T3 (80.0% of T2; attrition rate from T1=51.4%). There were no serious adverse events. (See Figure 2. CONSORT flow diagram.)

Of the 107 participants, the median number of rehabilitation programme sessions attended was five (58.9% participants attended  $\geq 5$  sessions); 83.2% participants attended at least one activity pacing session and 56.1% attended both activity pacing sessions. Of the 65 participants who completed T2, the median number of sessions attended was six (89.2% participants attended  $\geq 5$  sessions); 100% of participants attended at least one activity pacing specific session and 54 (83.1%) participants attended both activity pacing sessions. There were no statistically significant differences between participants who completed T2 or dropped out in terms of demographics or baseline symptoms. Of the 12 participants with CFS/ME, six completed T2 (50%) and six completed T3 (100% of T2, 50% of T1); whereas 59 of the 95 participants without CFS/ME completed T2 (62%) and 46 completed T3 (78% of T2 and 48% of T1).

## Acceptability of the rehabilitation programme/questionnaires (Objective 1)

1  
2  
3 On T2, participants rated their satisfaction of the length and content of the  
4  
5 rehabilitation programme as mean=8.8 (SD=1.7) and 9.1 (SD=1.5) respectively. The  
6  
7 satisfaction of only those participants with CFS/ME was mean=9.0 (SD=0.9) and 9.2  
8  
9 (SD=1.0).  
10  
11  
12  
13

14 There were minimal missing data in the questionnaire booklets (approximately 1%).

15  
16 Some participants wrote comments regarding their perceived benefits of  
17  
18 implementing activity pacing and other coping strategies. Two participants wished for  
19  
20 a longer programme or a follow-up session (see *Figure 3 for examples of*  
21  
22 *participants' comments*).  
23  
24  
25  
26  
27

### 28 **Fidelity to the activity pacing framework (Objective 2)**

29  
30  
31  
32  
33 Each healthcare professional observation demonstrated good adherence to the  
34  
35 framework against a number of key points. Healthcare professionals reported 100%  
36  
37 adherence in their fidelity checklists for each rehabilitation programme. Healthcare  
38  
39 professionals reported that some participants spent over 20 minutes completing the  
40  
41 questionnaire booklet, and that not all patients completed the activity diaries.  
42  
43  
44  
45  
46

### 47 **Interventions between T2 and T3**

48  
49  
50  
51 Of the 52 respondents at T3, two patients received lumbar epidural steroid injections,  
52  
53 one patient had acupuncture, one attended a chiropractor and one patient had knee  
54  
55 surgery.  
56  
57  
58  
59  
60

## Clinical outcomes

### Validity of the modified APQ-28 (Objective 3)

At T1, the two new APQ-28 items showed ease of completion through minimal missing answers (Item APQ12=0 missing answers, Item APQ15=1 missing answer).

The scores of the new items utilised the full range, and the mean scores (Items APQ12=1.67 and APQ15=1.91) sat within the range of the other APQ-28 items (mean=1.17-2.78). The new items demonstrated optimal fit with their allocated subthemes via highest inter-item correlations and item-total correlations (item total correlations: APQ12 and Activity adjustment,  $r_s(106)=0.76$ ,  $p<0.001$ ; Item APQ15 and Activity acceptance,  $r(106)=0.68$ ,  $p<0.001$ ). The internal consistency for Activity adjustment increased with the addition of Item APQ12 (Cronbach's alpha=0.86 to 0.88), and for Activity acceptance with the addition of Item APQ15 (Cronbach's alpha=0.68 to 0.72). The internal validity of the other APQ-28 subthemes were: Activity planning=0.86, Activity consistency=0.80 and Activity progression=0.69.

### Mean changes in activity pacing and symptoms (Objective 3)

Between T1-T2, all five APQ-28 subtheme mean scores increased, indicating improved activity pacing. There were small reductions in APQ-28 scores between T2-T3. However, all five subthemes showed overall improvements between T1-T3, with Activity planning showing the greatest increases (see Table 3). Sensitivity analyses showed marginal increases in mean changes following the addition of the two new APQ-28 items.

1  
2  
3  
4  
5  
6  
7  
8  
9  
10  
11  
12  
13  
14  
15  
16  
17  
18  
19  
20  
21  
22  
23  
24  
25  
26  
27  
28  
29  
30  
31  
32  
33  
34  
35  
36  
37  
38  
39  
40  
41  
42  
43  
44  
45  
46  
47  
48  
49  
50  
51  
52  
53  
54  
55  
56  
57  
58  
59  
60

Between T1-T2, the mean scores of all symptoms improved. Current pain reduced more than usual pain. Physical and mental fatigue both improved, as did self-efficacy and quality of life. Mental function improved more than physical function. Depression, anxiety and avoidance all reduced. There was some deterioration in symptoms between T2-T3, but between T1-T3 all symptoms demonstrated clear improvements except avoidance (-1.46, 95% CI=-3.02 to 0.10) and physical function (1.62, 95% CI=-0.81 to 4.06) (see Table 3.). Observing only the subgroup of participants with CFS/ME, improvements were seen between T1-T2 and T1-T3 across all APQ-28 subthemes and symptoms.



**Table 3. Mean change in the five subthemes of activity pacing (APQ-28) and all measures of symptoms between T1 (baseline), T2 (end of 6-weeks' treatment) and T3 (3-months' follow-up)**

| Measures                         | T1 mean (SD)<br>T2 mean (SD)                       | T2-T1 mean<br>change (95%<br>confidence<br>interval);<br>Effect size(d) | T2 mean (SD)<br>T3 mean (SD)                       | T3-T2 mean<br>change (95%<br>confidence<br>interval);<br>Effect size(d) | T3 mean<br>T1 mean                                  | T3-T1 mean<br>change (95%<br>confidence<br>interval);<br>Effect size(d) |
|----------------------------------|----------------------------------------------------|-------------------------------------------------------------------------|----------------------------------------------------|-------------------------------------------------------------------------|-----------------------------------------------------|-------------------------------------------------------------------------|
| APQ-28<br>Activity<br>adjustment | (n=63)<br>T1 mean=1.73(0.77)<br>T2 mean=2.43(0.73) | 0.70 (95% CI=<br>0.48 to 0.91);<br>Effect size<br>(d)=0.91              | (n=51)<br>T2 mean=2.44(0.72)<br>T3 mean=2.32(0.90) | -0.12 (95% CI=<br>-0.36 to 0.11);<br>Effect size<br>(d)=-0.17           | (n=50)<br>T1 mean=1.75(0.78)<br>T3 mean=2.33(0.90); | 0.58 (95% CI=<br>0.33 to 0.83);<br>Effect size<br>(d)=0.74              |
| APQ-28<br>Activity<br>planning   | (n=65)<br>T1 mean=1.44(0.95)<br>T2 mean=2.42(0.87) | 0.99 (95% CI=<br>0.72 to 1.26);<br>Effect size<br>(d)=1.03              | (n=52)<br>T2 mean=2.45(0.87)<br>T3 mean=2.06(1.02) | -0.39 (95% CI=<br>-0.70 to -0.07);<br>Effect size<br>(d)=-0.45          | (n=52)<br>T1 mean=1.42(0.96)<br>T3 mean=2.06(1.02)  | 0.64 (95% CI=<br>0.36 to 0.92)<br>Effect size<br>(d)=0.67               |

|                                                             |                                   |                                                    |                                                               |                                                    |                                                               |                                                    |                                                               |
|-------------------------------------------------------------|-----------------------------------|----------------------------------------------------|---------------------------------------------------------------|----------------------------------------------------|---------------------------------------------------------------|----------------------------------------------------|---------------------------------------------------------------|
| 1<br>2<br>3<br>4<br>5<br>6<br>7<br>8<br>9<br>10<br>11<br>12 | APQ-28<br>Activity<br>consistency | (n=65)<br>T1 mean=1.82(0.96)<br>T2 mean=2.65(0.74) | 0.84 (95% CI=<br>0.60 to 1.07)<br>Effect size<br>(d)=0.86     | (n=52)<br>T2 mean=2.66(0.71)<br>T3 mean=2.37(0.72) | -0.29 (95% CI=<br>-0.54 to -0.04)<br>Effect size<br>(d)=-0.41 | (n=52)<br>T1 mean=1.86(1.00)<br>T3 mean=2.37(0.72) | 0.51 (95% CI=<br>0.24 to 0.78)<br>Effect size<br>(d)=0.51     |
| 13<br>14<br>15<br>16<br>17<br>18<br>19<br>20<br>21          | APQ-28<br>Activity<br>acceptance  | (n=65)<br>T1 mean=1.87(0.84)<br>T2 mean=2.55(0.72) | 0.67 (95% CI=<br>0.46 to 0.89)<br>Effect size<br>(d)=0.81     | (n=52)<br>T2 mean=2.57(0.73)<br>T3 mean=2.42(0.95) | -0.15 (95% CI=<br>-0.38 to 0.08)<br>Effect size<br>(d)=-0.21  | (n=52)<br>T1 mean=1.84(0.91)<br>T3 mean=2.42(0.95) | 0.58 (95% CI=<br>0.33 to 0.84)<br>Effect size<br>(d)=0.64     |
| 22<br>23<br>24<br>25<br>26<br>27<br>28<br>29<br>30          | APQ-28<br>Activity<br>progression | (n=65)<br>T1 mean=1.45(0.88)<br>T2 mean=2.39(0.89) | 0.94 (95% CI=<br>0.65 to 1.22)<br>Effect size<br>(d)=1.07     | (n=52)<br>T2 mean=2.40(0.91)<br>T3 mean=2.00(0.91) | -0.40 (95% CI=<br>-0.75 to -0.05)<br>Effect size<br>(d)=-0.44 | (n=52)<br>T1 mean=1.45(0.85)<br>T3 mean=2.00(0.91) | 0.56 (95% CI=<br>0.24 to 0.87)<br>Effect size<br>(d)=0.65     |
| 31<br>32<br>33<br>34<br>35<br>36<br>37<br>38<br>39<br>40    | Current<br>pain                   | (n=65)<br>T1 mean=6.63(1.97)<br>T2 mean=5.31(2.38) | -1.32 (95% CI=<br>-1.91 to -0.74)<br>Effect size<br>(d)=-0.67 | (n=52)<br>T2 mean=5.04(2.36)<br>T3 mean=5.65(2.31) | 0.62 (95% CI=<br>-0.08 to 1.31)<br>Effect size<br>(d)=0.26    | (n=52)<br>T1 mean=6.58(1.99)<br>T3 mean=5.65(2.31) | -0.92 (95% CI=<br>-1.58 to -0.27)<br>Effect size<br>(d)=-0.47 |

|                  |                                                        |                                                               |                                                      |                                                               |                                                      |                                                               |
|------------------|--------------------------------------------------------|---------------------------------------------------------------|------------------------------------------------------|---------------------------------------------------------------|------------------------------------------------------|---------------------------------------------------------------|
|                  |                                                        |                                                               |                                                      |                                                               |                                                      |                                                               |
| Usual pain       | (n=65)<br>T1 mean=7.30(1.82)<br>T2 mean=6.62(2.08)     | -0.68 (95% CI=<br>-1.19 to -0.18)<br>Effect size<br>(d)=-0.37 | (n=51)<br>T2 mean=6.53(2.10)<br>T3 mean=6.55(1.91)   | 0.02 (95% CI=<br>-0.48 to 0.52)<br>Effect size<br>(d)=0.01    | (n=50)<br>T1 mean=7.30(1.62)<br>T3 mean=6.54(1.93)   | -0.76 (95% CI=<br>-1.27 to -0.25)<br>Effect size<br>(d)=-0.47 |
| Physical fatigue | (n=62)<br>T1 mean= 15.22(4.10)<br>T2 mean= 20.31(3.92) | 5.08 (95% CI=<br>3.95 to 6.21)<br>Effect size<br>(d)=1.24     | (n=51)<br>T2 mean=20.47(4.13)<br>T3 mean=18.12(4.18) | -2.35 (95% CI=<br>-3.44 to -1.26)<br>Effect size<br>(d)=-0.57 | (n=49)<br>T1 mean=15.35(3.90)<br>T3 mean=18.18(4.16) | 2.84 (95% CI=<br>1.34 to 4.33)<br>Effect size<br>(d)=0.73     |
| Mental fatigue   | (n=64)<br>T1 mean=8.86(2.77)<br>T2 mean=11.28(2.43)    | 2.42 (95% CI=<br>1.75 to 3.10)<br>Effect size<br>(d)=0.87     | (n=51)<br>T2 mean=11.45(2.20)<br>T3 mean=10.92(2.34) | -0.53 (95% CI=<br>-1.17 to 0.11)<br>Effect size<br>(d)=-0.24  | (n=51)<br>T1 mean=8.94(2.51)<br>T3 mean=10.92(2.34)  | 1.98 (95% CI=<br>1.33 to 2.64)<br>Effect size<br>(d)=0.79     |

|                   |                                                        |                                                               |                                                        |                                                              |                                                        |                                                               |
|-------------------|--------------------------------------------------------|---------------------------------------------------------------|--------------------------------------------------------|--------------------------------------------------------------|--------------------------------------------------------|---------------------------------------------------------------|
| Depression        | (n=63)<br>T1 mean=13.65(6.44)<br>T2 mean=7.14(6.09)    | -6.51 (95% CI=<br>-7.72 to -5.31)<br>Effect size<br>(d)=-1.01 | (n=51)<br>T2 mean=6.27(5.49)<br>T3 mean=9.23(5.75)     | 2.96 (95% CI=<br>1.64 to 4.29)<br>Effect size<br>(d)=0.54    | (n=51)<br>T1 mean=13.18(6.35)<br>T3 mean=9.09(5.76)    | -4.09 (95% CI=<br>-5.61 to -2.57)<br>Effect size<br>(d)=-0.64 |
| Anxiety           | (n=65)<br>T1 mean=9.91(5.47)<br>T2 mean=5.40(5.13)     | -4.51 (95% CI=<br>-5.60 to -3.42)<br>Effect size<br>(d)=-0.82 | (n=52)<br>T2 mean=4.65(4.47)<br>T3 mean=6.10(5.23)     | 1.44 (95% CI=<br>0.55 to 2.33)<br>Effect size<br>(d)=0.32    | (n=52)<br>T1 mean=9.47(5.06)<br>T3 mean=6.10(5.23)     | -3.37 (95% CI=<br>-4.63 to -2.12)<br>Effect size<br>(d)=-0.67 |
| Self-<br>efficacy | (n=65)<br>T1 mean=25.29(10.60)<br>T2 mean=36.29(14.12) | 11.00 (95% CI=<br>8.44 to 13.56)<br>Effect size<br>(d)=1.04   | (n=52)<br>T2 mean=37.96(14.12)<br>T3 mean=34.68(14.26) | -3.28 (95% CI=<br>-7.17 to 0.60)<br>Effect size<br>(d)=-0.23 | (n=52)<br>T1 mean=25.85(10.74)<br>T3 mean=34.68(14.26) | 8.83 (95% CI=<br>5.86 to 11.81)<br>Effect size<br>(d)=0.82    |
| Avoidance         | (n=64)<br>T1 mean=13.27(5.49)<br>T2 mean=10.28(5.89)   | -2.98 (95% CI=<br>-4.43 to -1.54)<br>Effect size<br>(d)=-0.54 | (n=52)<br>T2 mean=10.85(5.93)<br>T3 mean=12.12(5.79)   | 1.27 (95% CI=<br>-0.27 to 2.81)<br>Effect size<br>(d)=0.21   | (n=52)<br>T1 mean=13.58(5.66)<br>T3 mean=12.12(5.79)   | -1.46 (95% CI=<br>-3.02 to 0.10)<br>Effect size<br>(d)=-0.26  |

|                   |                                                        |                                                      |                                                        |                                                         |                                                        |                                                      |
|-------------------|--------------------------------------------------------|------------------------------------------------------|--------------------------------------------------------|---------------------------------------------------------|--------------------------------------------------------|------------------------------------------------------|
| Physical function | (n=63)<br>T1 mean=34.15(8.23)<br>T2 mean=38.82(9.06)   | 4.67 (95% CI= 2.69 to 6.65)<br>Effect size (d)=0.57  | (n=49)<br>T2 mean=39.45(8.72)<br>T3 mean=36.63(9.69)   | -2.82 (95% CI= -5.29 to -0.35)<br>Effect size (d)=-0.32 | (n=47)<br>T1 mean=34.92(7.98)<br>T3 mean=36.55(9.81)   | 1.62 (95% CI= -0.81 to 4.06)<br>Effect size (d)=0.20 |
| Mental function   | (n=63)<br>T1 mean=38.52(11.10)<br>T2 mean=45.83(11.48) | 7.30 (95% CI= 4.49 to 10.12)<br>Effect size (d)=0.66 | (n=49)<br>T2 mean=46.75(10.82)<br>T3 mean=44.78(10.44) | -1.97 (95% CI= -5.22 to 1.29)<br>Effect size (d)=-0.18  | (n=47)<br>T1 mean=38.61(10.65)<br>T3 mean=44.56(10.60) | 5.95 (95% CI= 2.83 to 9.08)<br>Effect size (d)=0.56  |
| Quality of life   | (n=59)<br>T1 mean=0.43(0.25)<br>T2 mean=0.56(0.28)     | 0.13 (95% CI= 0.07 to 0.18)<br>Effect size (d)=0.52  | (n=48)<br>T2 mean=0.60(0.25)<br>T3 mean=0.51(0.28)     | -0.09 (95% CI= -0.14 to -0.03)<br>Effect size (d)=-0.36 | (n=45)<br>T1 mean=0.45(0.24)<br>T3 mean=0.52(0.29)     | 0.07 (95% CI= 0.001 to 0.14)<br>Effect size (d)=0.29 |

*Activity pacing (Activity Pacing Questionnaire-28, APQ-28), Pain (Numerical Rating Scale 0-10), Physical/mental fatigue (Chalder Fatigue Questionnaire), Depression (Patient Health Questionnaire-9), Anxiety (Generalised Anxiety Disorder-7), Self-efficacy (Pain Self-Efficacy Questionnaire), Avoidance (Escape and avoidance subscale of the Pain Anxiety Symptoms Scale-20) Physical/mental function (Short-Form 12), Quality of life (EQ-5D-5L index score).*

1  
2  
3 **Associations between changes in activity pacing and symptoms: pre-post**  
4 **treatment (Objective 4)**  
5  
6  
7  
8  
9

10 Between T1-T2, there were significant correlations between increased APQ-28  
11 Activity acceptance and decreased current pain ( $r_s(65)=-0.29$ ,  $p=0.019$ ). Increased  
12 self-efficacy significantly correlated with all APQ-28 subthemes ( $p<0.05$ ) except  
13 APQ-28 Activity adjustment. Increased mental function was significantly correlated  
14 with increased APQ-28 Activity adjustment ( $r_s(61)=0.28$ ,  $p=0.030$ ) and Activity  
15 acceptance ( $r_s(63)=0.27$ ,  $p=0.031$ ). (See Table 4.)  
16  
17  
18  
19  
20  
21  
22  
23  
24  
25

26 There were no statistically significant correlations between the changes in any of the  
27 APQ-28 subthemes and changes in usual pain, physical/mental fatigue, depression,  
28 anxiety, avoidance, physical function or quality of life. Sensitivity analyses found the  
29 same pattern of significant/non-significant correlations when excluding the two new  
30 APQ-28 items.  
31  
32  
33  
34  
35  
36  
37  
38  
39  
40  
41  
42  
43  
44  
45  
46  
47  
48  
49  
50  
51  
52  
53  
54  
55  
56  
57  
58  
59  
60

**Table 4. Associations between changes in activity pacing and changes in symptoms between T1 and T2**

|                  | APQ-28 Activity<br>adjustment | APQ-28 Activity<br>planning             | APQ-28 Activity<br>consistency            | APQ-28 Activity<br>acceptance              | APQ-28 Activity<br>progression          |
|------------------|-------------------------------|-----------------------------------------|-------------------------------------------|--------------------------------------------|-----------------------------------------|
| Current pain     | $r_s(63)=-0.06, p=0.655$      | $r(65)=-0.15, p=0.223$                  | $r_s(65)=-0.06, p=0.616$                  | <b><math>r_s(65)=-0.29, p=0.019</math></b> | $r(65)=-0.17, p=0.189$                  |
| Usual pain       | $r_s(61)=0.04, p=0.765$       | $r(63)=-0.21, p=0.103$                  | $r_s(63)=0.001, p=0.996$                  | $r_s(63)=-0.09, p=0.508$                   | $r(63)=-0.15, p=0.910$                  |
| Physical fatigue | $r_s(62)=0.14, p=0.270$       | $r(62)=0.09, p=0.473$                   | $r_s(62)=0.20, p=0.121$                   | $r_s(62)=0.16, p=0.205$                    | $r(62)=0.15, p=0.256$                   |
| Mental fatigue   | $r_s(63)=0.03, p=0.836$       | $r_s(64)=-0.02, p=0.849$                | $r_s(64)=0.07, p=0.563$                   | $r_s(64)=-0.07, p=0.580$                   | $r_s(63)=-0.02, p=0.849$                |
| Depression       | $r_s(61)=-0.17, p=0.194$      | $r_s(63)=-0.13, p=0.310$                | $r_s(63)=-0.04, p=0.744$                  | $r_s(63)=-0.18, p=0.153$                   | $r_s(63)=-0.19, p=0.138$                |
| Anxiety          | $r_s(63)=-0.11, p=0.415$      | $r(65)=-0.19, p=0.122$                  | $r_s(65)=0.02, p=0.899$                   | $r_s(65)=-0.19, p=0.132$                   | $r(65)=-0.21, p=0.101$                  |
| Self-efficacy    | $r_s(63)=0.23, p=0.074$       | <b><math>r(65)=0.31, p=0.012</math></b> | <b><math>r_s(65)=0.26, p=0.034</math></b> | <b><math>r_s(65)=0.39, p=0.002</math></b>  | <b><math>r(65)=0.34, p=0.006</math></b> |
| Avoidance        | $r_s(63)=-0.03, p=0.801$      | $r(64)=-0.13, p=0.294$                  | $r_s(64)=-0.01, p=0.932$                  | $r_s(64)=0.09, p=0.495$                    | $r(64)=-0.10, p=0.430$                  |

|                   |                                           |                       |                         |                                           |                       |
|-------------------|-------------------------------------------|-----------------------|-------------------------|-------------------------------------------|-----------------------|
| Physical function | $r_s(61)=-0.05, p=0.708$                  | $r(63)=0.11, p=0.395$ | $r_s(63)=0.04, p=0.750$ | $r_s(63)=0.09, p=0.474$                   | $r(63)=0.15, p=0.230$ |
| Mental function   | <b><math>r_s(61)=0.28, p=0.030</math></b> | $r(63)=0.22, p=0.079$ | $r_s(63)=0.19, p=0.135$ | <b><math>r_s(63)=0.27, p=0.031</math></b> | $r(63)=0.24, p=0.056$ |
| Quality of life   | $r_s(58)=0.13, p=0.325$                   | $r(59)=0.26, p=0.051$ | $r_s(59)=0.05, p=0.695$ | $r_s(59)=0.23, p=0.078$                   | $r(59)=0.14, p=0.302$ |

*Significant correlations are highlighted in bold*

*Activity pacing (Activity Pacing Questionnaire-28, APQ-28), Pain (Numerical rating scale 0-10), Physical/mental fatigue (Chalder fatigue scale), Depression (Patient Health Questionnaire-9), Anxiety (Generalised Anxiety Disorder-7), Self-efficacy (Pain self-efficacy scale), Avoidance (Escape and avoidance subscale of the Pain Anxiety Symptoms Scale-20) Physical/mental function (Short-form 12), Quality of life (EQ-5D-5L)*



1  
2  
3 **Associations between changes in activity pacing and symptoms: pre-**  
4 **treatment to 3-months follow-up (Objective 4)**  
5  
6  
7  
8  
9

10 In addition to the significant correlations found during the pre-post treatment period  
11 (T1-T2) between various APQ-28 subthemes and improved current pain, self-  
12 efficacy and mental function; during the T1-T3 period the APQ-28 subthemes  
13 additionally correlated with improved physical and mental fatigue, improved quality of  
14 life, and reduced depression and anxiety ( $p < 0.05$ ). (See Table 5.)  
15  
16  
17  
18  
19  
20  
21  
22  
23

24 Similarly to the T1-T2 period, between T1-T3, there were no significant correlations  
25 between changes in any APQ-28 subthemes and usual pain, avoidance or physical  
26 function. Sensitivity analyses showed the same pattern of results when excluding the  
27 two new APQ-28 items with the exception of two non-significant associations  
28 between: Activity adjustment and mental function ( $r_s(46) = 2.78$ ,  $p = 0.062$ ) and Activity  
29 acceptance and depression ( $r_s(51) = -0.25$ ,  $p = 0.073$ ).  
30  
31  
32  
33  
34  
35  
36  
37  
38  
39  
40  
41  
42  
43  
44  
45  
46  
47  
48  
49  
50  
51  
52  
53  
54  
55  
56  
57  
58  
59  
60

**Table 5. Associations between changes in activity pacing and changes in symptoms between T1 and T3**

|                     | APQ-28 Activity<br>adjustment              | APQ-28 Activity<br>planning               | APQ-28 Activity<br>consistency             | APQ-28 Activity<br>acceptance              | APQ-28 Activity<br>progression             |
|---------------------|--------------------------------------------|-------------------------------------------|--------------------------------------------|--------------------------------------------|--------------------------------------------|
| Current pain        | $r_s(50)=-0.07, p=0.627$                   | $r(52)=-0.15, p=0.305$                    | <b><math>r(52)=-0.29, p=0.036</math></b>   | $r_s(52)=-0.09, p=0.522$                   | $r(52)=-0.22, p=0.120$                     |
| Usual pain          | $r_s(49)=-0.08, p=0.588$                   | $r(50)=-0.02, p=0.895$                    | $r(50)=0.07, p=0.634$                      | $r_s(50)=-0.15, p=0.287$                   | $r(50)=0.13, p=0.355$                      |
| Physical<br>fatigue | <b><math>r_s(48)=0.31, p=0.031</math></b>  | <b><math>r_s(49)=0.36, p=0.012</math></b> | <b><math>r_s(49)=0.34, p=0.018</math></b>  | <b><math>r_s(49)=0.35, p=0.014</math></b>  | <b><math>r_s(49)=0.40, p=0.005</math></b>  |
| Mental fatigue      | $r_s(49)=0.17, p=0.236$                    | <b><math>r(51)=0.40, p=0.004</math></b>   | <b><math>r(51)=0.36, p=0.009</math></b>    | $r_s(51)=0.24, p=0.089$                    | <b><math>r_s(51)=0.39, p=0.004</math></b>  |
| Depression          | <b><math>r_s(49)=-0.34, p=0.016</math></b> | $r_s(51)=-0.27, p=0.052$                  | <b><math>r_s(51)=-0.42, p=0.002</math></b> | <b><math>r_s(51)=-0.34, p=0.016</math></b> | <b><math>r_s(51)=-0.35, p=0.013</math></b> |
| Anxiety             | $r_s(50)=-0.28, p=0.051$                   | <b><math>r(52)=-0.31, p=0.024</math></b>  | <b><math>r(52)=-0.31, p=0.024</math></b>   | <b><math>r_s(52)=-0.46, p=0.001</math></b> | <b><math>r(52)=-0.34, p=0.015</math></b>   |
| Self-efficacy       | $r_s(50)=0.003, p=0.984$                   | <b><math>r(52)=0.35, p=0.010</math></b>   | <b><math>r(52)=0.42, p=0.002</math></b>    | $r_s(52)=0.25, p=0.070$                    | <b><math>r(52)=0.38, p=0.005</math></b>    |

|                   |                                           |                                         |                                         |                                           |                                         |
|-------------------|-------------------------------------------|-----------------------------------------|-----------------------------------------|-------------------------------------------|-----------------------------------------|
| Avoidance         | $r_s(50)=-0.08, p=0.580$                  | $r(52)=-0.20, p=0.148$                  | $r(52)=-0.14, p=0.320$                  | $r_s(52)=-0.24, p=0.092$                  | $r(52)=-0.22, p=0.126$                  |
| Physical function | $r_s(46)=-0.11, p=0.461$                  | $r(47)=0.07, p=0.653$                   | $r(47)=0.17, p=0.267$                   | $r_s(47)=0.09, p=0.563$                   | $r(47)=0.19, p=0.214$                   |
| Mental function   | <b><math>r_s(46)=0.29, p=0.049</math></b> | <b><math>r(47)=0.44, p=0.002</math></b> | <b><math>r(47)=0.41, p=0.004</math></b> | $r_s(47)=0.18, p=0.236$                   | <b><math>r(47)=0.41, p=0.004</math></b> |
| Quality of life   | $r_s(43)=0.25, p=0.109$                   | <b><math>r(45)=0.36, p=0.015</math></b> | $r(45)=0.23, p=0.127$                   | <b><math>r_s(45)=0.46, p=0.001</math></b> | <b><math>r(45)=0.40, p=0.006</math></b> |

*Significant correlations are highlighted in bold*

*Pain (Numerical rating scale 0-10), Physical/mental fatigue (Chalder fatigue scale), Depression (Patient Health Questionnaire-9), Anxiety (Generalised Anxiety Disorder-7), Self-efficacy (Pain self-efficacy scale), Avoidance (Escape and avoidance subscale of the Pain Anxiety Symptoms Scale-20) Physical/mental function (Short-form 12), Quality of life (EQ-5D-5L)*

## DISCUSSION

This study fulfilled the original aims of testing the feasibility and acceptability of using a new activity pacing framework to standardise instructions of activity pacing to assist planning a future effectiveness RCT. The study recruited to target and patients with chronic pain and chronic fatigue demonstrated both improvements in pacing strategies and reductions in symptoms.

### Feasibility

The activity pacing framework demonstrated feasibility through excellent fidelity to the framework by healthcare professionals via self-reported checklists and observations. Acceptability was demonstrated through patients' high satisfaction scores. Not all patients completed the activity diaries, however, this was optional for patients to facilitate their own self-reflection.

The recruitment rate (77%) was higher than estimated in the study protocol (50%). This was similar to a study exploring a five-week exercise programme for chronic hip pain (recruitment rate=76%),[46]; and this rate is considered 'Good' using cut-off levels of 80%=excellent and 70%=good from a feasibility study exploring a mind-body physical activity programme for chronic pain,[47]. The attrition rate between T1-T2 (39.3%) was as predicted in the protocol (40%), and lower than the 60% attrition rates reported across other studies investigating programmes for chronic pain,[20]. The attrition rate between T2-T3 (20.0%) was lower than predicted in the protocol

1  
2  
3 (50%), and the target sample size proved feasible to attain. These  
4  
5 recruitment/attrition rates will inform a future definitive RCT.  
6  
7  
8  
9

10 Regarding treatment adherence, only 56.1% of participants recruited at T1 attended  
11 both activity pacing sessions. Many participants (n=18, 16.8%) dropped out after the  
12 first session and therefore did not attend any activity pacing sessions. Reasons for  
13 early drop-out often include unrealistic expectations of symptom improvement, low  
14 motivation, or confidence to commit to programmes or behavioural changes,[20]. In  
15 comparison, attendance rates of both activity pacing sessions among those who  
16 completed T2 were 83.1%, and 89.2% of participants attended five or more  
17 sessions. This is comparable to adherence rates of 81% seen elsewhere,[46]; and  
18 adherence rates have been considered as 'Excellent' when 70% or more participants  
19 complete 75% of sessions,[47]. However, within the present study, the interpretation  
20 of high attendance rates from those who completed T2 are considered more  
21 modestly following the drop outs after Week 1.  
22  
23  
24  
25  
26  
27  
28  
29  
30  
31  
32  
33  
34  
35  
36  
37  
38  
39

40 Participants reported the condition of low back pain most frequently and CFS/ME the  
41 least frequently, as per current prevalence rates,[48, 49]. Our findings re-iterate the  
42 high occurrence of co-morbidities, and frequent co-existence of chronic pain among  
43 patients with CFS/ME,[9]. Participants with CFS/ME demonstrated improvements in  
44 symptoms following treatment, in comparison to other studies in which pacing has  
45 been ineffective,[31]. Disparate to the study by White et al.,[31], the activity pacing  
46 framework encourages a rehabilitative approach that facilitates increased function  
47 rather than aiming to reduce symptoms. The effects of rehabilitative approaches to  
48  
49  
50  
51  
52  
53  
54  
55  
56  
57  
58  
59  
60

1  
2  
3 activity pacing for patients with both chronic pain and fatigue requires further  
4  
5 investigation using effectiveness trials.  
6  
7  
8  
9

## 10 **Clinical outcomes**

11  
12  
13

14 Activity pacing improved across all APQ-28 subthemes, the largest improvement  
15 being for Activity planning. This theme refers to planning activities, setting time  
16 targets and assessing activity levels,[35]; practical facets of pacing which may be  
17 more accessible to change. Comparably, participants showed smaller improvements  
18 in Activity acceptance. This subtheme includes setting realistic goals and allowing  
19 flexibility; facets that involve changing previous behaviours or self-enforced rules.  
20 The APQ-28 detected multidimensional changes in activity pacing, and the two new  
21 items appeared to complement the scale. Further study will validate the APQ-28 in a  
22 larger sample and estimate minimally important changes.  
23  
24  
25  
26  
27  
28  
29  
30  
31  
32  
33  
34  
35  
36

37 The aims of the activity pacing framework are to improve patients' function and  
38 quality of life. Improvements in physical function were seen between T1-T2 (mean  
39 change=4.67) that were greater than the minimally clinically important change  
40 (3.29),[50]. There were also reductions in avoidance between T1-T2. It is intended  
41 that the quota-contingent, operant approach of the activity pacing framework  
42 encourages a reduction in avoidance through setting meaningful and realistic goals  
43 towards activity, rather than stopping activities with the aim of reducing/avoiding  
44 symptoms as per energy conservation approaches. Similarly, in a RCT comparing an  
45 operant approach with energy conservation, Racine et al.,[30] found the operant  
46 approach, but not energy conservation was associated with reduced avoidance  
47  
48  
49  
50  
51  
52  
53  
54  
55  
56  
57  
58  
59  
60

1  
2  
3 among patients with fibromyalgia. This, together with greater improvements in  
4 depressive symptoms following the operant approach over energy conservation, led  
5 to recommendations towards the operant approach for patients with  
6 fibromyalgia,[30]. The current study found that pre-post treatment (T1-T2)  
7 improvements in both avoidance and physical function showed some decline at three  
8 months' follow-up. The authors suggest that physical function may be a component  
9 of rehabilitation in which patients feel least confident, especially those with avoidant  
10 behaviours,[20]. This may have implications for future programmes to integrate  
11 follow-up sessions to encourage longer-term maintenance of physical activity. In  
12 comparison, Racine et al.,[30] found improvements in physical activity following both  
13 operant pacing and energy conservation approaches. Similarly to the present study,  
14 Racine et al.,[30] implemented handouts, homework and goal setting to encourage  
15 patients' uptake of activity pacing. However, both of the interventions explored by  
16 Racine et al.,[30] were of greater duration than the current study, comprising of 10  
17 two-hour stand-alone pacing sessions with a 3-month booster session. Within the  
18 current study, improvements in mental function between T1-T2 (mean change=7.3)  
19 were better maintained between T1-T3 (mean change=5.95); and both higher than  
20 the minimally clinically important change (3.77),[50]. Quality of life also improved  
21 between T1-T2 (mean change=0.13) and much of this improvement was maintained  
22 between T1-T3 (mean change=0.07); both changes exceeded the minimally  
23 important difference (0.037 +/-0.008),[51].

24  
25  
26 The activity pacing framework additionally aims to increase patients' self-efficacy.  
27 Improvements in self-efficacy were found between T1 (mean=25.29) and T2  
28 (mean=36.29), which were well maintained at T3 (mean=34.68). Scores were lower  
29  
30

1  
2  
3 than the  $\geq 40$  cut off. However, an improvement of  $>5.5$  was attained which is  
4  
5 considered a minimally important change,[52]. Both physical and mental fatigue  
6  
7 improved, and improvements in mental fatigue appeared to be better maintained at  
8  
9 T3. Comparisons to minimally important changes are unavailable.  
10  
11  
12  
13

14 Psychological health improved following the rehabilitation programme, including  
15  
16 reduced depression scores from moderate to mild (T1=13.7, T2=7.1, T3=9.1); with a  
17  
18 clinically significant reduction ( $\geq 5$ ) between T1-T2,[39]. Mean anxiety scores reduced  
19  
20 (T1=9.9, T2=5.4 and T3=6.10), and remained within the classification of mild  
21  
22 anxiety,[40]. Although reductions in pain were not a direct aim of the current  
23  
24 treatment, lower pain severity was reported. Despite the increased intensity of  
25  
26 pacing sessions contained within the RCT comparing the operant approach to  
27  
28 energy conservation, Racine et al.,[30] found that neither pacing approach effectively  
29  
30 reduced symptoms of pain or fatigue.  
31  
32  
33  
34  
35  
36  
37

38 There were fewer significant correlations between changes in activity pacing and  
39  
40 symptoms pre-post treatment (T1-T2) than longer-term (T1-T3). This may be due to  
41  
42 participants undertaking a more experimental phase during T1-T2 (such as finding  
43  
44 baselines, (re-)starting activities), whereas new routines were more established  
45  
46 between T1-T3. However, such differences may have occurred due to differences  
47  
48 among those patients who completed the T3 data collection (n=52) and those who  
49  
50 completed T2 but did not complete T3 (n=13). It is suggested that patients who  
51  
52 completed T3 possibly felt greater benefits from the treatment and were more  
53  
54 motivated to respond to the follow-up questionnaire. Such potential bias could be  
55  
56 explored in future study involving a larger sample. Noticeably, changes in activity  
57  
58  
59  
60



1  
2  
3 pacing were more frequently associated with improvements in psychological  
4  
5 wellbeing rather than physical wellbeing. Similarly, a meta-analysis found pacing was  
6  
7 not associated with improved physical function among patients with chronic  
8  
9 conditions,[5].  
10  
11  
12  
13

### 14 **Strengths and limitations**

15  
16  
17  
18  
19 Despite recruiting to target, this sample was not powered with a control arm to  
20  
21 determine treatment effectiveness. The exploratory statistical analyses were  
22  
23 correlative and do not indicate causation between increased activity pacing and  
24  
25 improved symptoms. As per other studies exploring activity pacing, pacing was  
26  
27 instructed as one component of the rehabilitation programme,[5]. Therefore,  
28  
29 improvements in symptoms may have resulted from any combination of coping  
30  
31 strategies. A future RCT will implement a suitable control to explore the effects of  
32  
33 pacing, while implementing the activity pacing framework in a clinically relevant  
34  
35 setting, including alongside other coping strategies.  
36  
37  
38  
39  
40  
41

42 The generalisability of this study is limited to a sample of predominantly females and  
43  
44 white ethnic origin. Recruitment occurred only at one Pain Service and this service  
45  
46 had an existing rehabilitation programme for both chronic pain and fatigue. Bias may  
47  
48 have arisen through the lead researcher delivering the healthcare professionals'  
49  
50 training and undertaking the observations. Further work will test the activity pacing  
51  
52 framework and study protocol across other healthcare services and explore  
53  
54 feasibility and fidelity over wider geographical locations.  
55  
56  
57  
58  
59  
60

1  
2  
3 It is unknown what potential bias was caused by the attrition rate. However, there  
4  
5 were no differences at baseline between those who completed the programme and  
6  
7 those who dropped out. The attrition rate may be reflective of some of the clinical  
8  
9 challenges and missed appointments surrounding the complexity of chronic  
10  
11 pain/fatigue. Further research could explore whether providing a follow-up improves  
12  
13 commitment to activity pacing.  
14  
15  
16  
17  
18

### 19 **Modifications for future study**

20  
21  
22  
23  
24 Since more patients completed the T1 questionnaires during the rehabilitation  
25  
26 sessions than at home, this may be the preferable mode of distribution. To lessen  
27  
28 the time taken to complete the questionnaires, the PASS-20 may be considered for  
29  
30 exclusion in future study. The whole 20-item PASS scale was included for reliability  
31  
32 and validity, but data from only the Escape and Avoidance subscale was explored.  
33  
34  
35 Modifications to the inclusion criteria may include patients with any chronic spinal  
36  
37 pain, including cervical/thoracic pain due to the frequent and similar presentation at  
38  
39 rehabilitation services.  
40  
41  
42  
43  
44

### 45 **Conclusion**

46  
47  
48  
49 To the authors' knowledge, this is the first study to explore the clinical utility of a  
50  
51 comprehensive activity pacing framework developed for both chronic pain and  
52  
53 chronic fatigue. The newly developed activity pacing framework proved feasible to  
54  
55 use clinically by healthcare professionals. Patients with both chronic pain and fatigue  
56  
57 implemented greater activity pacing strategies following treatment, alongside  
58  
59  
60

1  
2  
3 reporting improvements in quality of life, psychological wellbeing, self-efficacy, pain  
4 and fatigue. Physical function and avoidance improved to a lesser extent and for the  
5 shorter-term. Improvements in activity pacing were significantly associated with  
6 improvements in cognitive/psychological wellbeing and quality of life, but not physical  
7 function or avoidance. Future study will use the activity pacing framework in an  
8 effectiveness RCT to explore the effects of activity pacing on symptoms.  
9  
10  
11  
12  
13  
14  
15  
16  
17  
18

### 19 **ACKNOWLEDGEMENTS**

20  
21  
22  
23 We would like to acknowledge all of the patients and healthcare professionals who  
24 were involved in this study. We would also like to acknowledge our statistical  
25 support.  
26  
27  
28  
29  
30  
31  
32

### 33 **CONFLICT OF INTEREST**

34  
35  
36  
37 All authors declare no conflicts of interest  
38  
39  
40  
41

### 42 **AUTHOR CONTRIBUTIONS**

43  
44  
45  
46 DA, AMK, PK, SW and LMc all contributed to the conception and design of the study.  
47 DA undertook the acquisition of the data. DA, AMK, PK, SW and LMc all contributed  
48 to the analysis and interpretation of data. DA, AMK, PK, SW and LMc contributed to  
49 drafting the manuscript and revising it critically for important intellectual content and  
50  
51  
52  
53  
54  
55  
56  
57 have approved the final version for publication. DA, AMK, PK, SW and LMc are in  
58  
59  
60

1  
2  
3 agreement to be accountable for all aspects of the work in ensuring that questions  
4  
5  
6  
7 related to the accuracy or integrity of any part of the work are appropriately  
8  
9  
10 investigated and resolved.  
11  
12  
13  
14  
15  
16

## 17 **PATIENT CONSENT FOR PUBLICATION**

18  
19  
20  
21 Not required.  
22  
23  
24  
25

## 26 **DATA SHARING AGREEMENT**

27  
28  
29  
30 De-identified participant data are available from the corresponding author  
31  
32 (Deborah.Antcliff@pat.nhs.uk) upon reasonable request. Reuse is permitted for  
33  
34 health and care research as long as the original authors are acknowledged. The  
35  
36 protocol can also be requested from the author or accessed at ClinicalTrials.gov  
37  
38 (NCT03497585).  
39  
40  
41  
42  
43  
44

## 45 **ETHICAL APPROVAL**

46  
47  
48  
49 Ethical approval was granted by the London-Surrey Research Ethics Committee  
50  
51 (18/LO/0655).  
52  
53  
54  
55

## 56 **DISCLAIMER**

1  
2  
3 This paper presents independent research funded by Health Education  
4  
5 England/National Institute for Health Research (NIHR) [Clinical Lectureship (ICA-CL-  
6  
7 2015-01-019)]. The views expressed are those of the author(s) and not necessarily  
8  
9 those of the NHS, the NIHR or the Department of Health and Social Care.  
10  
11  
12  
13

## 14 **SOURCES OF FUNDING**

15  
16  
17  
18  
19 This work was supported by a Health Education England/National Institute for Health  
20  
21 Research (HEE/NIHR) Clinical Lectureship (grant number: ICA-CL-2015-01-019).  
22  
23  
24  
25

## 26 **REFERENCES**

- 27  
28  
29  
30  
31 1. Torrance N, Smith BH, Elliott AM, et al. Potential Pain Management Programmes  
32  
33 in primary care. A UK-wide questionnaire and Delphi survey of experts. *Fam Pract*  
34  
35 2011;28:41-8.  
36  
37  
38 2. Nijs J, Meeus M, De Meirleir K. Chronic musculoskeletal pain in chronic fatigue  
39  
40 syndrome: recent developments and therapeutic implications. *Man Ther*  
41  
42 2006;11:187-91.  
43  
44  
45 3. Nielson WR, Jensen MP, Karsdorp PA, et al. Activity pacing in chronic pain:  
46  
47 concepts, evidence, and future directions. *Clin J Pain* 2013;29:461-8.  
48  
49  
50 4. Antcliff D, Keenan AM, Keeley P, et al. Survey of activity pacing across healthcare  
51  
52 professionals informs a new activity pacing framework for chronic pain/fatigue.  
53  
54 *Musculoskeletal Care* 2019;17:335-45.  
55  
56  
57  
58  
59  
60

- 1  
2  
3 5. Abonie US, Sandercock GRH, Heesterbeek M, et al. Effects of activity pacing in  
4 patients with chronic conditions associated with fatigue complaints: a meta-analysis.  
5  
6 *Disabil Rehabil* 2020;42:613-22.  
7
- 8  
9  
10 6. Aggarwal VR, McBeth J, Zakrzewska JM, et al. The epidemiology of chronic  
11 syndromes that are frequently unexplained: do they have common associated  
12 factors? *Int J Epidemiol* 2006;35:468-76.  
13  
14
- 15  
16  
17 7. Meeus M, Nijs J. Central sensitization: a biopsychosocial explanation for chronic  
18 widespread pain in patients with fibromyalgia and chronic fatigue syndrome. *Clin*  
19 *Rheumatol* 2007;26:465-73.  
20  
21
- 22  
23  
24 8. Davis LL, Kroenke K, Monahan P, et al. The SPADE Symptom Cluster in Primary  
25 Care Patients With Chronic Pain. *Clin J Pain* 2016;32:388-93.  
26  
27
- 28  
29  
30 9. Meeus M, Nijs J, Meirleir KD. Chronic musculoskeletal pain in patients with the  
31 chronic fatigue syndrome: a systematic review. *Eur J Pain* 2007;11:377-86.  
32  
33
- 34  
35  
36 10. Tavel ME. Somatic symptom disorders without known physical causes: one  
37 disease with many names? *Am J Med* 2015;128:1054-8.  
38  
39
- 40  
41  
42 11. Yunus MB. Fibromyalgia and overlapping disorders: the unifying concept of  
43 central sensitivity syndromes. *Semin Arthritis Rheum* 2007;36:339-56.  
44  
45
- 46  
47  
48 12. Nijs J, Meeus M, Van Oosterwijck J, et al. In the mind or in the brain? Scientific  
49 evidence for central sensitisation in chronic fatigue syndrome. *Eur J Clin Invest*  
50 2012;42:203-12.  
51  
52
- 53  
54  
55 13. Arendt-Nielsen L, Morlion B, Perrot S, et al. Assessment and manifestation of  
56 central sensitisation across different chronic pain conditions. *Eur J Pain*  
57 2018;22:216-241.  
58  
59
- 60 14. Vlaeyen JW, Linton SJ. Fear-avoidance and its consequences in chronic  
musculoskeletal pain: a state of the art. *Pain* 2000;85:317-32.

- 1  
2  
3 15. Moseley GL. A pain neuromatrix approach to patients with chronic pain. *Man*  
4  
5 *Ther* 2003;8:130-40.  
6  
7  
8 16. Ericsson A, Mannerkorpi K. How to manage fatigue in fibromyalgia:  
9  
10 nonpharmacological options. *Pain Manag* 2016;6:331-8.  
11  
12 17. British Pain Society. Guidelines for pain management programmes for adults.  
13  
14 London: British Pain Society, 2013.  
15  
16 18. Beissner K, Henderson CR, Jr., Papaleontiou M, et al. Physical therapists' use of  
17  
18 cognitive-behavioral therapy for older adults with chronic pain: a nationwide survey.  
19  
20 *Phys Ther* 2009;89:456-69.  
21  
22  
23 19. Booth J, Moseley GL, Schiltenswolf M, et al. Exercise for chronic musculoskeletal  
24  
25 pain: A biopsychosocial approach. *Musculoskeletal Care* 2017;15:413-421.  
26  
27 20. Anderson RJ, Hurley RW, Staud R, et al. Cognitive-motivational influences on  
28  
29 health behavior change in adults with chronic pain. *Pain Med* 2016;17:1079-1093.  
30  
31 21. Birkholtz M, Aylwin L, Harman RM. Activity pacing in chronic pain management:  
32  
33 One aim, but which method? Part one: Introduction and literature review. *British*  
34  
35 *Journal of Occupational Therapy* 2004;67:447-52.  
36  
37  
38 22. Abonie US, Edwards AM, Hettinga FJ. Optimising activity pacing to promote a  
39  
40 physically active lifestyle in medical settings: A narrative review informed by clinical  
41  
42 and sports pacing research. *J Sports Sci* 2020;38:590-596.  
43  
44  
45 23. Jamieson-Lega K, Berry R, Brown CA. Pacing: A concept analysis of a chronic  
46  
47 pain intervention. *Pain Res Manag* 2013;18:207-13.  
48  
49  
50 24. Andrews NE, Deen M. Defining Activity Pacing: Is It Time to Jump Off the Merry-  
51  
52 Go-Round? *J Pain* 2016;17:1359-1362.  
53  
54  
55  
56  
57  
58  
59  
60

- 1  
2  
3 25. Andrews NE, Strong J, Meredith PJ. Activity pacing, avoidance, endurance, and  
4 associations with patient functioning in chronic pain: a systematic review and meta-  
5 analysis. *Arch Phys Med Rehabil* 2012;93:2109-2121 e7.  
6  
7  
8  
9  
10 26. Murphy SL, Clauw DJ. Activity pacing: what are we measuring and how does  
11 that relate to intervention? *Pain* 2010;149:582-583.  
12  
13  
14 27. Craig P, Dieppe P, Macintyre S, et al. Medical Research Council Guidance.  
15 Developing and evaluating complex interventions: The new Medical Research  
16 Council guidance. *BMJ* 2008;337:a1655. doi: 10.1136/bmj.a1655  
17  
18  
19 28. Creswell JW, Plano-Clark VL. *Designing and conducting mixed methods*  
20 *research*. California, USA: Sage Publications Ltd, 2011.  
21  
22  
23 29. Antcliff D, Keenan AM, Keeley P, et al. Engaging stakeholders to refine an  
24 activity pacing framework for chronic pain/fatigue: A nominal group technique.  
25 *Musculoskeletal Care* 2019;17:354-362.  
26  
27  
28 30. Racine M, Jensen MP, Harth M, et al. Operant Learning Versus Energy  
29 Conservation Activity Pacing Treatments in a Sample of Patients With Fibromyalgia  
30 Syndrome: A Pilot Randomized Controlled Trial. *J Pain* 2019;20:420-439.  
31  
32  
33 31. White PD, Goldsmith KA, Johnson AL, et al. Comparison of adaptive pacing  
34 therapy, cognitive behaviour therapy, graded exercise therapy, and specialist  
35 medical care for chronic fatigue syndrome (PACE): a randomised trial. *Lancet*  
36 2011;377:823-36.  
37  
38  
39 32. Lancaster GA, Thabane L. Guidelines for reporting non-randomised pilot and  
40 feasibility studies. *Pilot Feasibility Stud* 2019;5:114.  
41  
42  
43 33. Eldridge SM, Chan CL, Campbell MJ, et al. CONSORT 2010 statement:  
44 extension to randomised pilot and feasibility trials. *BMJ* 2016;355:i5239.  
45  
46  
47  
48  
49  
50  
51  
52  
53  
54  
55  
56  
57  
58  
59  
60



- 1  
2  
3 34. Sim J, Lewis M. The size of a pilot study for a clinical trial should be calculated in  
4 relation to considerations of precision and efficiency. *J Clin Epidemiol* 2012;65:301-  
5  
6 8.  
7  
8  
9  
10 35. Antcliff D, Campbell M, Woby S, et al. Assessing the Psychometric Properties of  
11 an Activity Pacing Questionnaire for Chronic Pain and Fatigue. *Phys Ther*  
12 2015;95:1274-86.  
13  
14  
15  
16 36. Jensen MP, Turner JA, Romano JM. What is the maximum number of levels  
17 needed in pain intensity measurement? *Pain* 1994;58:387-92.  
18  
19  
20 37. Chalder T, Berelowitz G, Pawlikowska T, et al. Development of a fatigue scale.  
21 *Journal of Psychosomatic Research* 1993;37:147-53.  
22  
23  
24 38. Kroenke K, Spitzer RL, Williams JB. The PHQ-9: validity of a brief depression  
25 severity measure. *J Gen Intern Med* 2001;16:606-13.  
26  
27  
28 39. Kroenke K, Spitzer RL, Williams JB, et al.. The Patient Health Questionnaire  
29 Somatic, Anxiety, and Depressive Symptom Scales: a systematic review. *Gen Hosp*  
30 *Psychiatry* 2010;32:345-59.  
31  
32  
33 40. Spitzer RL, Kroenke K, Williams JB, et al. A brief measure for assessing  
34 generalized anxiety disorder: the GAD-7. *Arch Intern Med* 2006;166:1092-7.  
35  
36  
37 41. Nicholas MK. The pain self-efficacy questionnaire: Taking pain into account. *Eur*  
38 *J Pain* 2007;11:153-63.  
39  
40  
41 42. McCracken LM, Dhingra L. A short version of the Pain Anxiety Symptoms Scale  
42 (PASS-20): preliminary development and validity. *Pain Res Manag* 2002;7:45-50.  
43  
44  
45 43. Ware J, Jr., Kosinski M, Keller SD. A 12-Item Short-Form Health Survey:  
46 construction of scales and preliminary tests of reliability and validity. *Medical Care*  
47 1996;34:220-33.  
48  
49  
50  
51  
52  
53  
54  
55  
56  
57  
58  
59  
60

- 1  
2  
3 44. Herdman M, Gudex C, Lloyd A, et al. Development and preliminary testing of the  
4 new five-level version of EQ-5D (EQ-5D-5L). *Qual Life Res* 2011;20:1727-36.  
5  
6  
7 45. van Hout B, Janssen MF, Feng Y, et al. Interim Scoring for the EQ-5D-5L:  
8 Mapping the EQ-5D-5L to EQ-5D-3L Value Sets. *Value in Health* 2012;15:708 –715.  
9  
10  
11 46. Bearne LM, Walsh NE, Jessep S, et al. Feasibility of an exercise-based  
12 rehabilitation programme for chronic hip pain. *Musculoskeletal Care* 2011;9:160-8.  
13  
14  
15 47. Greenberg J, Lin A, Zale EL, et al. Development And Early Feasibility Testing Of  
16 A Mind-Body Physical Activity Program For Patients With Heterogeneous Chronic  
17 Pain; The GetActive Study. *J Pain Res* 2019;12:3279-3297.  
18  
19  
20 48. Hartvigsen J, Hancock MJ, Kongsted A, et al. What low back pain is and why we  
21 need to pay attention. *Lancet* 2018;391:2356-67.  
22  
23  
24 49. NICE. Chronic fatigue syndrome/myalgic encephalomyelitis (or encephalopathy).  
25 *NICE Clinical Guideline 53 London* 2007.  
26  
27  
28 50. Diaz-Arribas MJ, Fernandez-Serrano M, Royuela A, et al. Minimal Clinically  
29 Important Difference in Quality of Life for Patients With Low Back Pain. *Spine (Phila*  
30 *Pa 1976)* 2017;42:1908-1916.  
31  
32  
33 51. McClure NS, Sayah FA, Xie F, et al. Instrument-Defined Estimates of the  
34 Minimally Important Difference for EQ-5D-5L Index Scores. *Value Health*  
35 2017;20:644-650.  
36  
37  
38 52. Chiarotto A, Vanti C, Cedraschi C, et al. Responsiveness and Minimal Important  
39 Change of the Pain Self-Efficacy Questionnaire and Short Forms in Patients With  
40 Chronic Low Back Pain. *J Pain* 2016;17:707-18.  
41  
42  
43  
44  
45  
46  
47  
48  
49  
50  
51  
52  
53  
54  
55

## 56 **FIGURE LEGENDS**

57  
58 Figure 1. Activity pacing conceptual model taken from the activity pacing framework  
59  
60

1  
2  
3 Figure 2: CONSORT diagram showing the flow of participants through the study  
4

5 Figure 3. Participants' written comments following attending the rehabilitation  
6

7  
8 programme  
9  
10  
11  
12  
13  
14  
15  
16  
17  
18  
19  
20  
21  
22  
23  
24  
25  
26  
27  
28  
29  
30  
31  
32  
33  
34  
35  
36  
37  
38  
39  
40  
41  
42  
43  
44  
45  
46  
47  
48  
49  
50  
51  
52  
53  
54  
55  
56  
57  
58  
59  
60

For peer review only

1  
2  
3  
4  
5  
6  
7  
8  
9  
10  
11  
12  
13  
14  
15  
16  
17  
18  
19  
20  
21  
22  
23  
24  
25  
26  
27  
28  
29  
30  
31  
32  
33  
34  
35  
36  
37  
38  
39  
40  
41  
42  
43  
44  
45  
46  
47  
48  
49  
50  
51  
52  
53  
54  
55  
56  
57  
58  
59  
60

This framework uses the term 'Activity Pacing', which may be more similar to an operant approach, driven by quota-contingency rather than symptom-contingency. Our model of pacing moves beyond a purely behavioural approach since it also integrates thoughts and beliefs. Activity pacing within this framework encourages acceptance, active decision-making and flexibility, both in selecting which facets of pacing to implement and also when to pace.

This pacing model is based upon addressing behaviours such as fear-avoidance, excessive persistence and overactivity-underactivity cycling. This pacing model includes the potential for reversibility of some of the consequences of chronic pain/fatigue, for example, to reduce disability. As such, activity pacing is described as a rehabilitative strategy rather than an adaptive strategy in this framework.

In keeping with a rehabilitative approach, the aims of activity pacing within this framework include: improved physical and cognitive function, improved quality of life, increased sense of control and choice, and increased satisfaction with activities. Activity pacing may improve the management and ability to cope with symptoms where there is greater acceptance and flexibility. This framework does not advocate the use of activity pacing with the direct aim of reducing symptoms when this results in decreased function or dissatisfaction, or if this encourages avoidant behaviour/working below tolerance levels.

This activity pacing framework recognises pacing as a multidimensional concept that involves different facets, such as breaking down tasks, finding baselines of tolerable activities, implementing consistent levels of activities, planning activities, setting goals of meaningful activities, accepting activity levels and gradually increasing activities. Different facets of activity pacing are tailored to individuals' needs, aims and activity behaviours.

*Figure 1. Activity pacing conceptual model taken from the activity pacing framework*

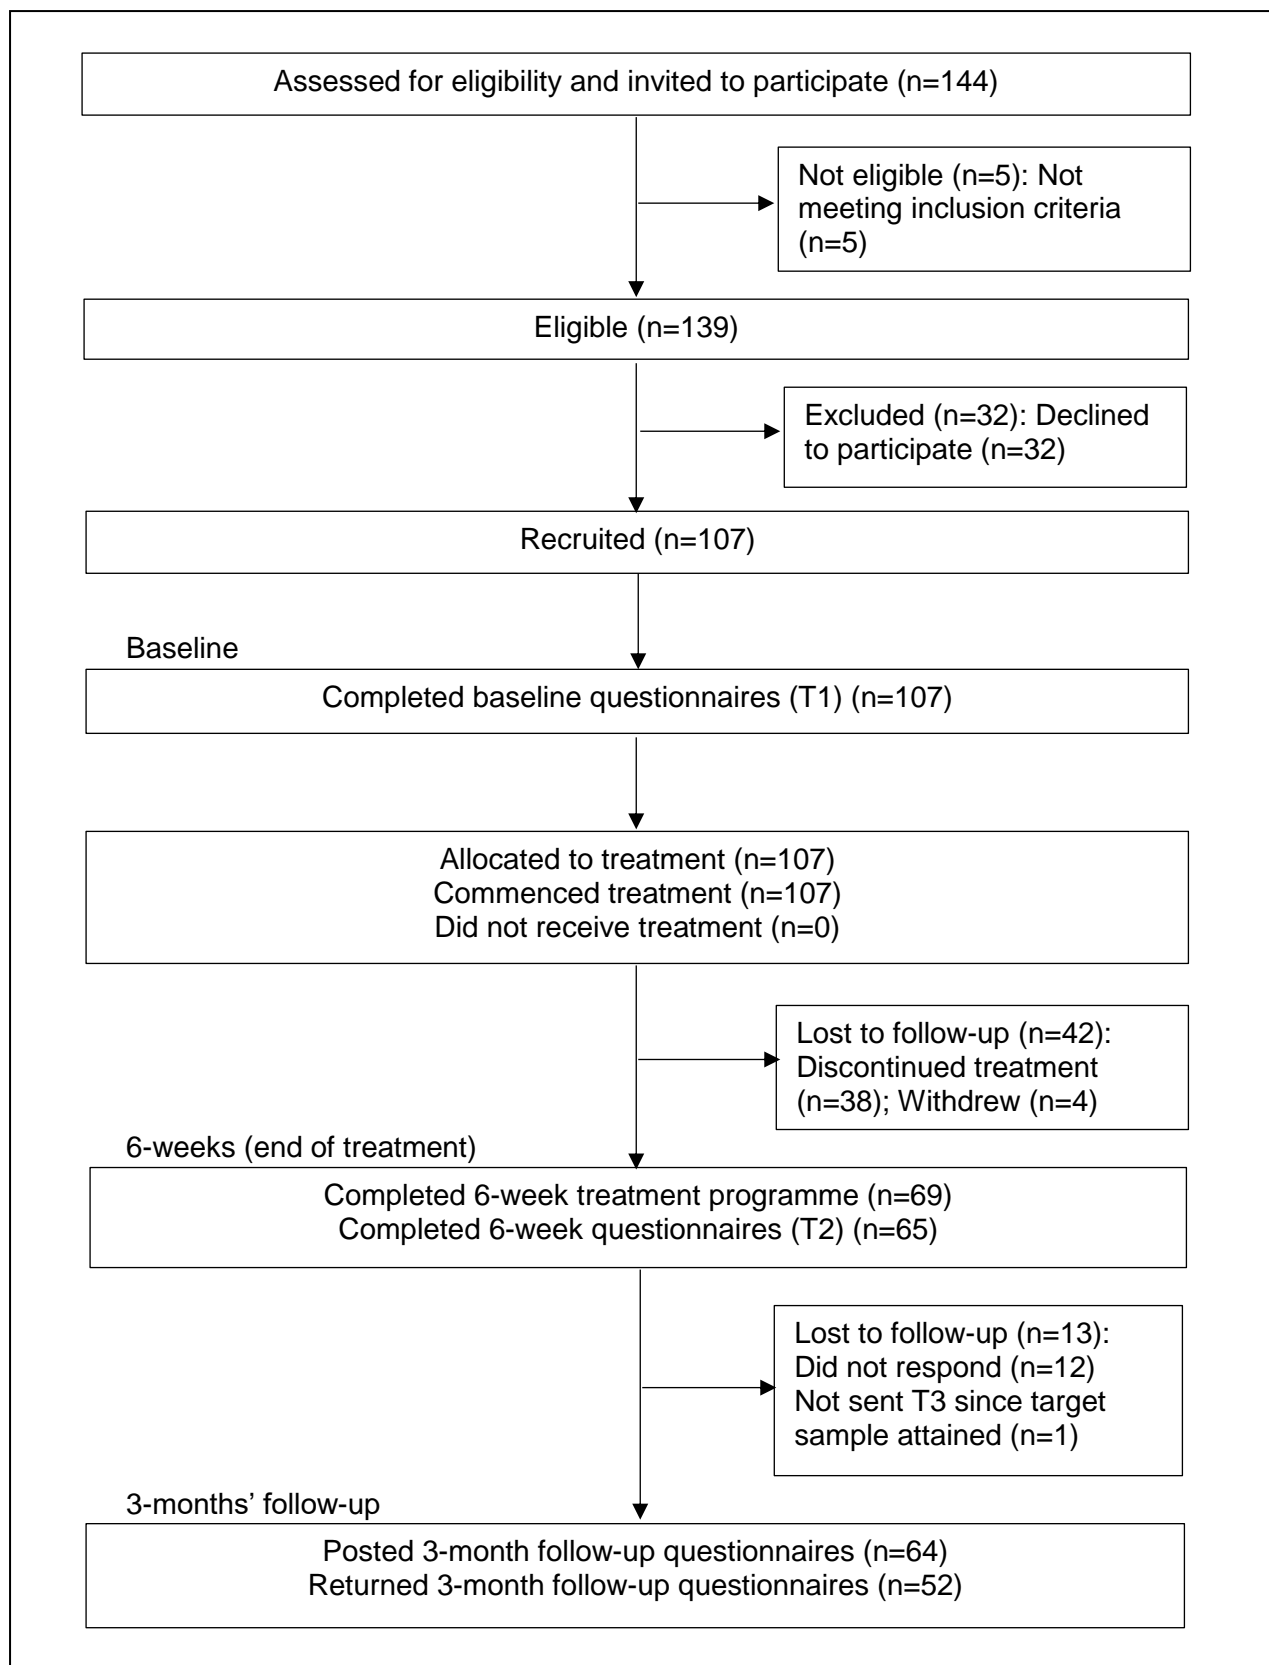

Figure 2: CONSORT diagram showing the flow of participants through the study

1  
2  
3  
4 T2: "The pace and content has been good for me. It has helped me to focus on  
5 my belief that I have to own the situation, to be positive and to make use of the  
6 tools we have discussed. If I don't take this approach I believe my situation will  
7 not improve. There is no magic wand, but I can be the difference." (F070:  
8  
9

10 *Fibromyalgia*)  
11  
12

13  
14 T3: "I have found pacing really helpful in my everyday life and feel I can achieve  
15 more day to day than 12 months ago." (F006: *chronic widespread pain,*  
16 *fibromyalgia, chronic fatigue syndrome/myalgic encephalomyelitis*)  
17  
18

19  
20  
21 T3: "I found the pain service very helpful and informative. How I view my pain and  
22 react to and manage it has improved. Emotionally, I feel more positive as a result  
23 of using strategies learned, and also more confident that I can manage my pain  
24 and how it makes me feel. Using pacing and realistic goals has enabled me to do  
25 some activities that I previously avoided i.e. hoovering, changing the bed. (F068:  
26 *fibromyalgia*)  
27  
28  
29  
30

31  
32  
33 T3: "Doing the 6 week course was extremely helpful and gave me some excellent  
34 information and resources to work with. The difficulty has been that there has  
35 been no follow up or support sessions since. It is great having the info, but then  
36 you are battling depression/anxiety it is difficult to apply knowledge without some  
37 support, even if that is over the phone every few weeks or maybe a support group  
38 facility." (F075: *low back pain, chronic widespread pain*)  
39  
40  
41  
42

43  
44  
45 T3 "I have found 'pacing' a very good way to manage pain and get through the  
46 day completing activities" (F105: *low back pain, chronic widespread pain,*  
47 *fibromyalgia*)  
48  
49  
50

51  
52  
53 *Figure 3. Participants' written comments following attending the rehabilitation*  
54 *programme*  
55  
56  
57  
58  
59  
60

## SUPPLEMENTARY MATERIAL

**Supplementary Figure 1. Content of the Activity Pacing Framework: Overview and Theory, and Appendices and Teaching Guide booklets****A. Overview and Theory**

## 1. Glossary

## 2. Introduction:

Why is an activity pacing framework needed?

How has the activity pacing framework been developed?

## 3. Definition of activity pacing

## 4. Aims of pacing

Examples of aims of pacing and their clinical application

## 5. Who can benefit from pacing?

## 6. Activity behaviours:

Avoidance behaviour/fear-avoidance

Over-exertion/excessive persistence

Boom-bust/overactivity-underactivity cycling

## 7. Quota-contingent and symptom-contingent pacing

## 8. Models of pacing:

Operant approach

Energy conservation

Activity pacing framework model of pacing

## 9. Facets of pacing:

Facets of pacing, broader pacing themes and individuals who may benefit

Facets of pacing that are not endorsed for routine use, but may be considered during a flare-up of symptoms

## 10. Getting started with pacing: stages of pacing

## 11. Potential barriers to pacing:

Addressing barriers

## 12. How pacing relates to other coping strategies

Pacing and graded exercise/graded activity

Pacing and cognitive behavioural therapy

Pacing and acceptance and commitment therapy

Pacing and mindfulness

Pacing and relaxation

## SUPPLEMENTARY MATERIAL

Pacing and sleep hygiene

Pacing and other strategies

13. Pacing aids

Activity diaries

Goal setting

**B. Appendices and teaching guide**

*Part 1. Conceptual model of pacing*

Appendix 1. Activity pacing and the fear-avoidance model

Appendix 2. Pacing as a health behaviour:

The Health Action Process Approach (HAPA)

The Transtheoretical model

*Part 2. Pacing guide for healthcare professionals*

Appendix 3. Chronic pain/fatigue cycle

Appendix 4. Overactivity-underactivity (boom-bust) cycle:

Boom-bust, avoidance and excessive persistence behaviours

Appendix 5. Activity pacing framework model of pacing

Appendix 6. Facets of pacing:

Facets of pacing, explanation/examples and who may benefit

Appendix 7. Stages of pacing

Appendix 8. Patient exemplars:

Avoidance

Excessive persistence

Boom-bust

Patients who are predominantly bedbound

Appendix 9. Questions for healthcare professionals to ask patients:

Exploring current patterns of activity

Exploring current baselines of activity

Exploring possible barriers to pacing

Exploring individuals' aims

*Part 3. Pacing tools*

Appendix 10. Activity diary:



SUPPLEMENTARY MATERIAL

- 1
- 2
- 3
- 4           Blank activity diary and example of a completed diary
- 5           Appendix 11. Goal setting
- 6           Appendix 12. Checklist for health care professionals
- 7
- 8           Appendix 13. References
- 9
- 10
- 11
- 12
- 13
- 14
- 15
- 16
- 17
- 18
- 19
- 20
- 21
- 22
- 23
- 24
- 25
- 26
- 27
- 28
- 29
- 30
- 31
- 32
- 33
- 34
- 35
- 36
- 37
- 38
- 39
- 40
- 41
- 42
- 43
- 44
- 45
- 46
- 47
- 48
- 49
- 50
- 51
- 52
- 53
- 54
- 55
- 56
- 57
- 58
- 59
- 60

For peer review only

## SUPPLEMENTARY MATERIAL

Supplementary Table 1. CONSORT checklist

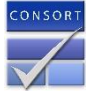

## CONSORT 2010 checklist of information to include when reporting a pilot or feasibility trial\*

| Section/Topic             | Item No | Checklist item                                                                                                                                      | Reported on page No                                                                                                                     |
|---------------------------|---------|-----------------------------------------------------------------------------------------------------------------------------------------------------|-----------------------------------------------------------------------------------------------------------------------------------------|
| <b>Title and abstract</b> |         |                                                                                                                                                     |                                                                                                                                         |
|                           | 1a      | Identification as a pilot or feasibility randomised trial in the title                                                                              | Title page<br>(Page 1)                                                                                                                  |
|                           | 1b      | Structured summary of pilot trial design, methods, results, and conclusions (for specific guidance see CONSORT abstract extension for pilot trials) | The abstract is structured as per the <i>BMJ Open</i> format, but it contains the information as per the CONSORT checklist.<br>(Page 3) |
| <b>Introduction</b>       |         |                                                                                                                                                     |                                                                                                                                         |
| Background and objectives | 2a      | Scientific background and explanation of rationale for future definitive trial, and reasons for randomised pilot trial                              | Pages 5-7                                                                                                                               |
|                           | 2b      | Specific objectives or research questions for pilot trial                                                                                           | Page 7                                                                                                                                  |

## SUPPLEMENTARY MATERIAL

| <b>Methods</b>         |    |                                                                                                                                                                                             |                                     |
|------------------------|----|---------------------------------------------------------------------------------------------------------------------------------------------------------------------------------------------|-------------------------------------|
| Trial design           | 3a | Description of pilot trial design (such as parallel, factorial) including allocation ratio                                                                                                  | Page 8                              |
|                        | 3b | Important changes to methods after pilot trial commencement (such as eligibility criteria), with reasons                                                                                    | N/A                                 |
| Participants           | 4a | Eligibility criteria for participants                                                                                                                                                       | Page 9                              |
|                        | 4b | Settings and locations where the data were collected                                                                                                                                        | Page 12                             |
|                        | 4c | How participants were identified and consented                                                                                                                                              | Pages 8-9                           |
| Interventions          | 5  | The interventions for each group with sufficient details to allow replication, including how and when they were actually administered                                                       | Pages 10 and supplementary figure 2 |
| Outcomes               | 6a | Completely defined prespecified assessments or measurements to address each pilot trial objective specified in 2b, including how and when they were assessed                                | Pages 11-13                         |
|                        | 6b | Any changes to pilot trial assessments or measurements after the pilot trial commenced, with reasons                                                                                        | N/A                                 |
|                        | 6c | If applicable, prespecified criteria used to judge whether, or how, to proceed with future definitive trial                                                                                 | N/A                                 |
| Sample size            | 7a | Rationale for numbers in the pilot trial                                                                                                                                                    | Page 8                              |
|                        | 7b | When applicable, explanation of any interim analyses and stopping guidelines                                                                                                                | N/A                                 |
| Randomisation:         |    |                                                                                                                                                                                             |                                     |
| Sequence generation    | 8a | Method used to generate the random allocation sequence                                                                                                                                      | N/A                                 |
|                        | 8b | Type of randomisation(s); details of any restriction (such as blocking and block size)                                                                                                      | N/A                                 |
| Allocation concealment | 9  | Mechanism used to implement the random allocation sequence (such as sequentially numbered containers), describing any steps taken to conceal the sequence until interventions were assigned | N/A                                 |

## SUPPLEMENTARY MATERIAL

|                                                         |     |                                                                                                                                                                                       |                                                                                                                    |
|---------------------------------------------------------|-----|---------------------------------------------------------------------------------------------------------------------------------------------------------------------------------------|--------------------------------------------------------------------------------------------------------------------|
| mechanism                                               |     |                                                                                                                                                                                       |                                                                                                                    |
| Implementation                                          | 10  | Who generated the random allocation sequence, who enrolled participants, and who assigned participants to interventions                                                               | N/A                                                                                                                |
| Blinding                                                | 11a | If done, who was blinded after assignment to interventions (for example, participants, care providers, those assessing outcomes) and how                                              | N/A                                                                                                                |
|                                                         | 11b | If relevant, description of the similarity of interventions                                                                                                                           | N/A                                                                                                                |
| Statistical methods                                     | 12  | Methods used to address each pilot trial objective whether qualitative or quantitative                                                                                                | Page 14                                                                                                            |
| <b>Results</b>                                          |     |                                                                                                                                                                                       |                                                                                                                    |
| Participant flow<br>(a diagram is strongly recommended) | 13a | For each group, the numbers of participants who were approached and/or assessed for eligibility, randomly assigned, received intended treatment, and were assessed for each objective | Page 20<br>Figure 2:<br>CONSORT<br>flow diagram                                                                    |
|                                                         | 13b | For each group, losses and exclusions after randomisation, together with reasons                                                                                                      | N/A                                                                                                                |
| Recruitment                                             | 14a | Dates defining the periods of recruitment and follow-up                                                                                                                               | Page 15                                                                                                            |
|                                                         | 14b | Why the pilot trial ended or was stopped                                                                                                                                              | Page 15.<br>Figure 2:<br>CONSORT<br>flow diagram<br>states T3<br>(follow up)<br>was stopped<br>due to<br>attaining |

## SUPPLEMENTARY MATERIAL

|                          |     |                                                                                                                                                                                |                  |
|--------------------------|-----|--------------------------------------------------------------------------------------------------------------------------------------------------------------------------------|------------------|
|                          |     |                                                                                                                                                                                | target sample    |
| Baseline data            | 15  | A table showing baseline demographic and clinical characteristics for each group                                                                                               | Tables 1 and 2   |
| Numbers analysed         | 16  | For each objective, number of participants (denominator) included in each analysis. If relevant, these numbers should be by randomised group                                   | Tables 3-5       |
| Outcomes and estimation  | 17  | For each objective, results including expressions of uncertainty (such as 95% confidence interval) for any estimates. If relevant, these results should be by randomised group | Tables 3-5       |
| Ancillary analyses       | 18  | Results of any other analyses performed that could be used to inform the future definitive trial                                                                               | Tables 4-5       |
| Harms                    | 19  | All important harms or unintended effects in each group (for specific guidance see CONSORT for harms)                                                                          | Page 20          |
|                          | 19a | If relevant, other important unintended consequences                                                                                                                           | N/A              |
| <b>Discussion</b>        |     |                                                                                                                                                                                |                  |
| Limitations              | 20  | Pilot trial limitations, addressing sources of potential bias and remaining uncertainty about feasibility                                                                      | Pages 40-41      |
| Generalisability         | 21  | Generalisability (applicability) of pilot trial methods and findings to future definitive trial and other studies                                                              | Page 40          |
| Interpretation           | 22  | Interpretation consistent with pilot trial objectives and findings, balancing potential benefits and harms, and considering other relevant evidence                            | Pages 35-41      |
|                          | 22a | Implications for progression from pilot to future definitive trial, including any proposed amendments                                                                          | 41               |
| <b>Other information</b> |     |                                                                                                                                                                                |                  |
| Registration             | 23  | Registration number for pilot trial and name of trial registry                                                                                                                 | Abstract; Page 8 |
| Protocol                 | 24  | Where the pilot trial protocol can be accessed, if available                                                                                                                   | Page 8           |

## SUPPLEMENTARY MATERIAL

|         |    |                                                                                            |             |
|---------|----|--------------------------------------------------------------------------------------------|-------------|
| Funding | 25 | Sources of funding and other support (such as supply of drugs), role of funders            | Page 44     |
|         | 26 | Ethical approval or approval by research review committee, confirmed with reference number | Pages 8, 43 |

Citation: Eldridge SM, Chan CL, Campbell MJ, Bond CM, Hopewell S, Thabane L, et al. CONSORT 2010 statement: extension to randomised pilot and feasibility trials. *BMJ*. 2016;355.

\*We strongly recommend reading this statement in conjunction with the CONSORT 2010, extension to randomised pilot and feasibility trials, Explanation and Elaboration for important clarifications on all the items. If relevant, we also recommend reading CONSORT extensions for cluster randomised trials, non-inferiority and equivalence trials, non-pharmacological treatments, herbal interventions, and pragmatic trials. Additional extensions are forthcoming: for those and for up to date references relevant to this checklist, see [www.consort-statement.org](http://www.consort-statement.org).

## SUPPLEMENTARY MATERIAL

**Supplementary Figure 2: Content of the rehabilitation programme****Week 1**

Introduction to the programme  
Aims and concerns of the programme  
Understanding chronic pain  
Chronic pain/fatigue cycle  
Benefits of exercise  
Graded exercise (circuit exercises)  
Relaxation session  
Goal setting (SMART goals)

**Week 2**

Goal review  
Understanding pain and the emotional effects: negative thinking and unhelpful thoughts  
Pacing Session 1:  
    Activity patterns (boom-bust, avoidance and excessive persistence)  
    Aims of pacing  
    Barriers to pacing  
    Using activity diaries for the week ahead  
Graded exercise (circuit exercises)  
Mindfulness session  
Goal setting

**Week 3**

Goal review  
Pacing Session 2:  
    Discuss the completed activity diaries  
    Facets of pacing  
    Stages of pacing  
Dealing with difficult thoughts  
Graded exercise (circuit exercises)  
Mindfulness session

## SUPPLEMENTARY MATERIAL

1  
2  
3 Goal setting: specific pacing goal  
4  
5

6  
7 **Week 4**

8 Pacing goal review  
9

10 Choice V's demand activities  
11

12 Increasing positive thoughts  
13

14 Work and employment  
15

16 Graded exercise (circuit exercises)  
17

18 Mindfulness session  
19

20 Goal setting  
21

22 **Week 5**

23 Goal review  
24

25 Sleep hygiene  
26

27 Medication  
28

29 Graded exercise (circuit exercises)  
30

31 Mindfulness session  
32

33 Goal setting  
34

35 **Week 6**

36 Goal review  
37

38 Managing setbacks  
39

40 Mindfulness session  
41

42 Maintaining progress  
43

44 Signposting to community resources  
45  
46  
47  
48  
49  
50  
51  
52  
53  
54  
55  
56  
57  
58  
59  
60



## SUPPLEMENTARY MATERIAL

**Supplementary Table 2. Five themes of the activity pacing questionnaire (APQ) with examples**

| APQ Theme            | Example of items                                                                                                                                                 |
|----------------------|------------------------------------------------------------------------------------------------------------------------------------------------------------------|
| Activity adjustment  | <p>"I broke tasks up into periods of activity and rest"</p> <p>"I alternated the type of activity that I was doing"</p>                                          |
| Activity consistency | <p>"I did a similar amount of activity on 'good' and 'bad' days"</p> <p>"I made sure I did some activity every day, even if I had a "bad" day"</p>               |
| Activity progression | <p>"I gradually increased how long I could spend on my activities"</p> <p>"I gradually increased activities that I had been avoiding because of my symptoms"</p> |
| Activity planning    | <p>"I set activity goals that were meaningful for me"</p> <p>"I planned in advance how long I would spend on each activity"</p>                                  |
| Activity acceptance  | <p>"I changed my activity targets if they were unrealistic"</p> <p>"I set activity goals that were realistic for me"</p>                                         |

# BMJ Open

## Testing a newly developed activity pacing framework for chronic pain/fatigue: a feasibility study

|                                 |                                                                                                                                                                                                                                                                                                                                                                                                                                                                                                                                                                                                                                                                          |
|---------------------------------|--------------------------------------------------------------------------------------------------------------------------------------------------------------------------------------------------------------------------------------------------------------------------------------------------------------------------------------------------------------------------------------------------------------------------------------------------------------------------------------------------------------------------------------------------------------------------------------------------------------------------------------------------------------------------|
| Journal:                        | <i>BMJ Open</i>                                                                                                                                                                                                                                                                                                                                                                                                                                                                                                                                                                                                                                                          |
| Manuscript ID                   | bmjopen-2020-045398.R2                                                                                                                                                                                                                                                                                                                                                                                                                                                                                                                                                                                                                                                   |
| Article Type:                   | Original research                                                                                                                                                                                                                                                                                                                                                                                                                                                                                                                                                                                                                                                        |
| Date Submitted by the Author:   | 17-Oct-2021                                                                                                                                                                                                                                                                                                                                                                                                                                                                                                                                                                                                                                                              |
| Complete List of Authors:       | Antcliff, Deborah; Northern Care Alliance NHS Group, Physiotherapy Department, Fairfield General Hospital; University of Leeds Faculty of Medicine and Health, School of Healthcare<br>Keenan, Anne-Maree; University of Leeds Faculty of Medicine and Health, School of Healthcare; NIHR Leeds Musculoskeletal Biomedical Research Unit<br>Keeley, Philip; Keele University School of Nursing and Midwifery<br>Woby, Steve ; Northern Care Alliance NHS Group Research & Innovation, Research and Innovation Department; University of Salford School of Health and Society<br>McGowan, Linda; University of Leeds Faculty of Medicine and Health, School of Healthcare |
| <b>Primary Subject Heading</b>: | Rehabilitation medicine                                                                                                                                                                                                                                                                                                                                                                                                                                                                                                                                                                                                                                                  |
| Secondary Subject Heading:      | Rehabilitation medicine                                                                                                                                                                                                                                                                                                                                                                                                                                                                                                                                                                                                                                                  |
| Keywords:                       | PAIN MANAGEMENT, REHABILITATION MEDICINE, Musculoskeletal disorders < ORTHOPAEDIC & TRAUMA SURGERY                                                                                                                                                                                                                                                                                                                                                                                                                                                                                                                                                                       |
|                                 |                                                                                                                                                                                                                                                                                                                                                                                                                                                                                                                                                                                                                                                                          |

SCHOLARONE™  
Manuscripts



I, the Submitting Author has the right to grant and does grant on behalf of all authors of the Work (as defined in the below author licence), an exclusive licence and/or a non-exclusive licence for contributions from authors who are: i) UK Crown employees; ii) where BMJ has agreed a CC-BY licence shall apply, and/or iii) in accordance with the terms applicable for US Federal Government officers or employees acting as part of their official duties; on a worldwide, perpetual, irrevocable, royalty-free basis to BMJ Publishing Group Ltd ("BMJ") its licensees and where the relevant Journal is co-owned by BMJ to the co-owners of the Journal, to publish the Work in this journal and any other BMJ products and to exploit all rights, as set out in our [licence](#).

The Submitting Author accepts and understands that any supply made under these terms is made by BMJ to the Submitting Author unless you are acting as an employee on behalf of your employer or a postgraduate student of an affiliated institution which is paying any applicable article publishing charge ("APC") for Open Access articles. Where the Submitting Author wishes to make the Work available on an Open Access basis (and intends to pay the relevant APC), the terms of reuse of such Open Access shall be governed by a Creative Commons licence – details of these licences and which [Creative Commons](#) licence will apply to this Work are set out in our licence referred to above.

Other than as permitted in any relevant BMJ Author's Self Archiving Policies, I confirm this Work has not been accepted for publication elsewhere, is not being considered for publication elsewhere and does not duplicate material already published. I confirm all authors consent to publication of this Work and authorise the granting of this licence.

1  
2  
3 **Title: Testing a newly developed activity pacing framework for chronic**  
4 **pain/fatigue: a feasibility study**  
5  
6  
7  
8  
9

10 **AUTHORS**  
11

12 Dr Deborah Antcliff (PhD)<sup>a,b</sup>  
13

14 <sup>a</sup>Physiotherapy Department, Bury Care Organisation, Northern Care Alliance NHS  
15 Group, Bury, United Kingdom.  
16  
17

18 <sup>b</sup>School of Healthcare, University of Leeds, Leeds, United Kingdom.  
19  
20  
21  
22

23  
24 Professor Anne-Maree Keenan (PhD)<sup>b,c</sup>  
25

26 <sup>b</sup>School of Healthcare, University of Leeds, Leeds, United Kingdom  
27

28 <sup>c</sup>NIHR Leeds Biomedical Research Centre, Leeds, England, UK  
29  
30  
31  
32

33 Professor Philip Keeley (PhD)<sup>d</sup>  
34

35 <sup>d</sup>School of Nursing and Midwifery, Keele University, Keele, United Kingdom  
36  
37  
38  
39

40 Professor Steve Woby (PhD)<sup>e,f,g</sup>  
41

42 <sup>e</sup>Research and Innovation Department, Northern Care Alliance NHS Group, Salford,  
43 United Kingdom.  
44  
45

46 <sup>f</sup>School of Health and Society, University of Salford, Salford, United Kingdom.  
47  
48

49 <sup>g</sup>Faculty of Science and Engineering, Manchester Metropolitan University,  
50 Manchester, United Kingdom.  
51  
52  
53  
54

55  
56 Professor Linda McGowan (PhD)<sup>b</sup>  
57

58 <sup>b</sup>School of Healthcare, University of Leeds, Leeds, United Kingdom  
59  
60

**CORRESPONDING AUTHOR**

Dr Deborah Antcliff (PhD)

Physiotherapy Department

Fairfield General Hospital

Bury Care Organisation

Northern Care Alliance NHS Group

Rochdale Old Road

Bury, England

BL9 7TD

United Kingdom

Deborah.Antcliff@nca.nhs.uk

Tel: +44 (0)161 7242168

Fax: Nil available

ORCID ID: 0000-0002-9771-8232

Institutional URL: <http://www.leeds.ac.uk/>

Word count: 4,542 words

**KEY WORDS**

Pain management; Rehabilitation medicine, Musculoskeletal disorders

## ABSTRACT

**Objectives:** To test the feasibility of using a new activity pacing framework to standardise healthcare professionals' instructions of pacing, and explore whether measures of activity pacing/symptoms detected changes following treatment.

**Design:** Single-arm, repeated measures study.

**Setting:** One NHS Pain Service in Northern England, U.K.

**Participants:** Adult patients with chronic pain/fatigue, including chronic low back pain, chronic widespread pain, fibromyalgia and chronic fatigue syndrome/myalgic encephalomyelitis.

**Interventions:** Six-week rehabilitation programme, standardised using the activity pacing framework.

**Outcome measures:** Feasibility was explored via patients' recruitment/attrition rates, adherence and satisfaction, and healthcare professionals' fidelity.

Questionnaire data were collected from patients at the start and end of the programme (T1 and T2 respectively) and three months' follow-up (T3).

Questionnaires included measures of activity pacing, current/usual pain, physical/mental fatigue, depression, anxiety, self-efficacy, avoidance, physical/mental function and quality of life. Mean changes in activity pacing and symptoms between T1-T2, T2-T3 and T1-T3 were estimated.

**Results:** Of the 139 eligible patients, 107 patients consented (recruitment rate=77%); 65 patients completed T2 (T1-T2 attrition rate=39%), and 52 patients completed T3 (T1-T3 attrition rate=51%). At T2, patients' satisfaction ratings averaged 9/10, and 89% attended  $\geq 5$  rehabilitation programme sessions. Activity

1  
2  
3 pacing and all symptoms improved between T1-T2, with smaller improvements  
4  
5 maintained at T3.  
6

7  
8 **Conclusion:** The activity pacing framework was feasible to implement and patients'  
9  
10 ability to pace and manage their symptoms improved. Future work will employ a  
11  
12 suitable comparison group and test the framework across wider settings to explore  
13  
14 the effects of activity pacing in a randomised controlled trial.  
15

16  
17 **Trial registration:** ClinicalTrials.gov:NCT03497585  
18

19  
20 **Funding:** Health Education England/National Institute for Health Research  
21  
22

## 23 24 **STRENGTHS AND LIMITATIONS OF THIS STUDY**

- 25  
26  
27  
28 • This was the first study to test the feasibility of using a newly developed  
29  
30 activity pacing framework in a rehabilitation programme to standardise the  
31  
32 clinical instructions of activity pacing to patients with chronic pain/fatigue.  
33  
34
- 35  
36 • This feasibility study recruited to target with satisfactory recruitment/attrition  
37  
38 rates.  
39
- 40  
41 • A comprehensive measure of activity pacing: the 28-item Activity Pacing  
42  
43 Questionnaire (APQ-28), and range of validated psychometric measures were  
44  
45 suitable to detect changes before and after treatment.  
46
- 47  
48 • This study was not powered with a control arm to determine treatment  
49  
50 effectiveness.  
51
- 52  
53 • The generalisability of this study is limited to a sample of predominantly  
54  
55 females, of white ethnic origin, and from a single Pain Service.  
56  
57  
58  
59  
60

## INTRODUCTION

Activity pacing is a principal coping strategy for patients with long-term conditions, including chronic low back pain, chronic widespread pain, fibromyalgia and chronic fatigue syndrome/myalgic encephalomyelitis (CFS/ME),[1-5]. Chronic pain and chronic fatigue are known to co-exist,[6, 7] and overlap in symptoms, including depression, anxiety and disability,[8-11]. Conditions of chronic pain/fatigue may share similar disease processes: physical deconditioning following under-activity/avoidance, pathophysiological/psychological processes and central sensitisation,[11-16]. Treatments aim to reverse some of these processes: to improve physical/mental functioning, increase tolerance and improve quality of life,[12, 15, 17]. Recommended treatments include psychological therapies (for example, cognitive behavioural therapy) and graded exposure to activity/exercise,[15, 16]; of which activity pacing is a key component,[18-20].

Patients with chronic pain/fatigue may present with altered behaviours, including underactivity or avoidance of activities that are perceived as harmful or that may exacerbate symptoms; over-activity or excessive persistence to push through/distract from symptoms; or fluctuations between overactivity-underactivity,[21]. Activity pacing provides an alternative behaviour to enable patients to (re-)engage with activities in a manner that encourages their progression towards more regular or improved functioning,[4, 22, 23].

At present, there remains confusion regarding how activity pacing is defined or interpreted, and the effects on patients' symptoms,[5, 24, 25]. There is no widely-



1  
2  
3 used guide to standardise how healthcare professionals instruct activity pacing to  
4 patients; and uncertainty whether different methods are required for symptoms of  
5 chronic pain versus chronic fatigue,[3, 26]. This poses challenges how to advise  
6 patients with both chronic pain and fatigue.  
7  
8  
9  
10  
11  
12

13  
14 We have developed an activity pacing framework using an inclusive approach for  
15 patients who present at rehabilitation services with chronic pain and/or fatigue. Using  
16 the Medical Research Council guidelines for developing complex interventions,  
17 mixed methods were implemented to encompass theoretical and stakeholder  
18 standpoints,[27]. Mixed methods comprise of quantitative and qualitative approaches  
19 to collecting and analysing data,[28]. Stage I: Healthcare professionals' survey  
20 gathered opinions on activity pacing (n=92),[4]. These findings, together with existing  
21 research formed the first draft of the framework and accompanying appendices.  
22  
23 Stage II: Nominal group technique refined the activity pacing framework using a  
24 consensus meeting between patients and healthcare professionals (n=10),[29].  
25  
26 During the development of the activity pacing framework, stakeholders included  
27 healthcare professionals and patients with the aim of increasing the clinical utility and  
28 acceptability of the framework. (*See Supplementary Figure 1. Content of the Activity  
29 Pacing Framework: Theory and Overview, and Appendices and Teaching Guide  
30 booklets.*)  
31  
32  
33  
34  
35  
36  
37  
38  
39  
40  
41  
42  
43  
44  
45  
46  
47  
48  
49  
50

51 The conceptual model of the activity pacing framework (*see Figure 1*) follows  
52 principles of quota-contingency and the operant approach (for example, setting goals  
53 according to time/distance/activity). The activity pacing framework is underpinned by  
54 concepts of rehabilitation with aims of improving physical and cognitive function; and  
55  
56  
57  
58  
59  
60

1  
2  
3 engagement in, and satisfaction with meaningful activities, while managing  
4 symptoms,[4, 29]. The activity pacing framework includes the potential for  
5  
6 reversibility of some of the consequences of chronic pain/fatigue, such as the  
7  
8 potential to reduce levels of disability. Together with containing themes of adjusting  
9  
10 activities, planning and consistency, the activity pacing framework also includes  
11  
12 themes of progression regarding the amount and/or variety of activities. Therefore,  
13  
14 the activity pacing framework is considered to be a rehabilitative approach that  
15  
16 moves forward from only adapting, or in some cases mal-adapting to the long-term  
17  
18 condition. The activity pacing framework differs from energy conservation/adaptive  
19  
20 pacing approaches which involve undertaking activities according to symptom  
21  
22 severity (symptom-contingency) with an aim of reducing or avoiding symptoms,[30,  
23  
24 31]. Within the current activity pacing framework, quota-contingency is advised  
25  
26 alongside concepts of flexibility and choice to enable relevance and sustainability in  
27  
28 conditions where symptoms may vary. The framework refers to all types of activities  
29  
30 including work, household activities, cognitive activities, physical activities, exercise  
31  
32 and relaxation to increase its wider relevance for patients with chronic pain and/or  
33  
34 fatigue, for varying abilities and behaviours.  
35  
36  
37  
38  
39  
40  
41  
42  
43  
44  
45  
46  
47  
48  
49  
50  
51  
52  
53  
54  
55  
56  
57  
58  
59  
60

The aim of this study was to test the feasibility of using the activity pacing framework to underpin a rehabilitation programme for chronic pain/fatigue. In preparation for a future clinical trial, specific objectives included: (1)Exploring participant recruitment/attrition rates and adherence/acceptability (for both chronic pain and fatigue); (2)Exploring healthcare professionals' fidelity to the framework; and (3)Exploring the suitability of the outcome measures, including the modified 28-item Activity Pacing Questionnaire (APQ-28).

## METHODS

### Study design

This single-arm, repeated measures study is reported as a non-randomised feasibility study using the extended CONSORT guidelines,[32, 33] (See *Supplementary Table 1*). Quantitative questionnaire data were collected from patients at the start (T1) and end (T2) of the six-week rehabilitation programme, and at three month's follow-up (T3). The study was prospectively registered (protocol available at ClinicalTrials.gov: NCT03497585). Ethical approval was granted by the London-Surrey Research Ethics Committee (18/LO/0655). The acceptability of the framework, explored via interviews with patients and healthcare professionals is reported elsewhere,[34].

### Participant recruitment

Participants were identified from consecutive referrals to a rehabilitation programme for chronic pain/fatigue in a Pain Service in Northern England, United Kingdom. All patients attended a minimum of one face-to-face appointment before referral to the programme. Participants received the study information via the post one week before attending the programme and/or during the first session of the programme. The consent form was completed either at home or during the first session.

## Eligibility criteria

Eligible patients were aged  $\geq 18$  years, with symptoms for  $\geq 3$  months and with a general practitioner or hospital consultant diagnosis of chronic low back pain, chronic widespread pain, fibromyalgia or CFS/ME. Patients were required to read and write in English. Ineligible patients were those with evidence of a serious underlying pathology, such as a current diagnosis of cancer, or patients with severe mental health or cognitive functioning issues.

## Sample size

A sample size of 50 patients has been recommended for feasibility studies to enable estimates of recruitment/attrition, means/standard deviations and changes in means to prepare for future clinical trials,[35]. To attain a sample of 50 participants at T3, it was estimated that 340 patients may need to be approached to allow for a 50% recruitment rate at T1, a 40% attrition rate between T1-T2 and a 50% return rate at T3.

## Existing rehabilitation programme

The existing rehabilitation programme comprised of six consecutive weekly sessions (each 3.5 hours) delivered by healthcare professionals (pain specialist physiotherapists and psychological wellbeing practitioners). The programme included understanding complex symptoms, sleep hygiene, graded exercise, goal

1  
2  
3 setting, relaxation and mindfulness. Pacing was instructed in one session but was  
4  
5 not informed or standardised by any particular guide or framework.  
6  
7  
8  
9

### 10 **Activity pacing framework standardised programme**

11  
12  
13

14 The existing six-week programme was modified through re-structuring and  
15  
16 standardisation using the activity pacing framework. Activity pacing was formally  
17  
18 instructed on two sessions (weeks 2-3). However, activity pacing was referenced  
19  
20 throughout the programme in relation to other coping strategies, for example, how  
21  
22 activity pacing can assist graded exercise (weeks 1-5) or set-back management  
23  
24 (week 6). In comparison to the existing rehabilitation programme, the activity pacing  
25  
26 framework standardised programme included more in-depth discussions of activity  
27  
28 behaviours (avoidance, overactivity-underactivity cycling and excessive persistence)  
29  
30 to assist patients to identify their current approach to activities. This aimed to  
31  
32 facilitate patients' recognition of which facets of activity pacing were most relevant to  
33  
34 them. The two activity pacing sessions focused on the aims of activity pacing,  
35  
36 barriers to activity pacing, facets of activity pacing (for example, breaking down  
37  
38 tasks, switching between activities, having more consistent activity levels, allowing  
39  
40 flexibility, gradually increasing the amount or variety of activities), and stages of  
41  
42 activity pacing (introducing activity pacing, finding baselines, adjusting activities,  
43  
44 planning, consistency, learning and progressing). Practical exercises included  
45  
46 completing an activity diary to discuss patients' activity patterns and setting goals in  
47  
48 which activity pacing could be practised. (See *Supplementary Figure 2. Content of*  
49  
50 *the rehabilitation programme*). Patients received a handout to summarise the key  
51  
52 concepts of activity pacing. The healthcare professionals (as above) received  
53  
54  
55  
56  
57  
58  
59  
60

1  
2  
3 training on the framework during a half-day session and could contact the lead  
4 researcher (DA) for any queries. All patients attended the standardised programme,  
5  
6 but patients chose whether to participate in the study through their optional  
7  
8 completion of the study questionnaires and consent form.  
9  
10  
11  
12  
13

## 14 **Data collection**

### 15 **Feasibility outcomes**

16  
17  
18  
19  
20  
21  
22  
23  
24 Measures of feasibility included participant recruitment/attrition rates, adherence  
25  
26 (number of sessions attended), acceptability (two satisfaction rating scales regarding  
27  
28 the programme content and length where 0=dissatisfied and 10=fully satisfied), and  
29  
30 missing data in the questionnaire. For every programme, healthcare professionals  
31  
32 completed a 13-item fidelity checklist based on the conceptual model of the activity  
33  
34 pacing framework to ensure their inclusion of key elements from the framework.  
35  
36  
37 Each clinician was observed once by the lead researcher.  
38  
39  
40  
41

### 42 **Clinical measures**

43  
44  
45  
46  
47 The self-reported paper questionnaire booklets (T1, T2 and T3) included  
48  
49 standardised clinical measures. T1 could be completed during session one or at  
50  
51 home, T2 could be completed during session six, and T3 was sent in the post to be  
52  
53 completed at home. Telephone reminders were made if the T3 questionnaires were  
54  
55 not returned within two weeks. The T1 booklet contained demographic questions, in  
56  
57 addition to following measures included in T2 and T3:  
58  
59  
60

1  
2  
3  
4  
5 (1) Activity pacing was measured using the 28-item Activity Pacing Questionnaire  
6 (APQ-28). The 26-item Activity Pacing Questionnaire (APQ-26) was initially validated  
7  
8 among patients with chronic pain/fatigue and contained five subthemes: Activity  
9  
10 adjustment, Activity planning, Activity consistency, Activity acceptance and Activity  
11  
12 progression (Cronbach's alpha=0.72-0.92),[36]. (See *Supplementary Table 2. Five*  
13  
14 *themes of the 28-item Activity Pacing Questionnaire (APQ-28) with examples.*) Each  
15  
16 item is scored between 0='never did this' and 4='always did this'. Two items have  
17  
18 been added that correspond to important aspects of activity pacing that emerged  
19  
20 during the development of the activity pacing framework. The new items: APQ12:"I  
21  
22 found a baseline amount of activities that I could do on 'good' and 'bad' days" and  
23  
24 APQ15:"I had a flexible approach with my activities" were added to the subthemes of  
25  
26 best conceptual fit (Activity adjustment and Activity acceptance respectively). Each  
27  
28 subtheme was calculated as a mean score. The APQ-28 subthemes, similarly to the  
29  
30 following scales, permitted one missing item per subscale.  
31  
32  
33  
34  
35  
36  
37  
38  
39

40 (2) Current and usual pain were measured using two 11-point numerical rating  
41  
42 scales (NRS), where 0='no pain' and 10='worst possible pain',[37].  
43  
44  
45

46 (3) Physical fatigue (seven items) and mental fatigue (four items) were measured  
47  
48 using the Chalder Fatigue Questionnaire (CFQ), where scores of 1='much worse  
49  
50 than usual' and 4='better than usual',[38]. Two subscale scores were summated  
51  
52 where higher scores indicated less fatigue.  
53  
54  
55  
56  
57  
58  
59  
60

1  
2  
3 (4) Depression was measured using the nine item Patient Health Questionnaire  
4  
5 (PHQ-9), the items of which are based on the Diagnostic and Statistical Manual of  
6  
7 Mental Disorders 4th Edition (DSM-IV),[39]. Items were rated between 0='not at all'  
8  
9 and 3='nearly everyday'. Total scores of 1-4=minimal depression, 5-9=mild  
10  
11 depression, 10-14=moderate depression and  $\geq 15$ =severe depression,[39, 40].  
12  
13  
14

15  
16  
17 (5) Anxiety was measured using the seven-item Generalised Anxiety Disorder  
18  
19 Assessment (GAD-7). Items were rated between 0='not at all' and 3='nearly  
20  
21 everyday'. Total scores of 5-9=mild anxiety, 10-14=moderate anxiety and  
22  
23  $\geq 15$ =severe anxiety,[41].  
24  
25  
26

27  
28 (6) Self-efficacy was measured using the 10-item Pain Self-Efficacy Questionnaire  
29  
30 (PSEQ) where items were rated between 0='not at all confident' and 6='completely  
31  
32 confident'. Total scores of  $PSEQ \geq 40$  indicate those patients who are more likely to  
33  
34 continue implementing coping strategies/behavioural changes, and  $PSEQ \leq 16$  are  
35  
36 considered low,[42].  
37  
38  
39

40  
41 (7) Avoidance was measured using the 'Escape and Avoidance' subscale of the Pain  
42  
43 Anxiety Symptoms Scale-short version (PASS-20),[43]. The five items were rated  
44  
45 between 0='never' and 5='always' where higher total scores indicated greater  
46  
47 avoidance.  
48  
49  
50

51  
52 (8) Physical and mental function were measured using the 12-Item Short-Form  
53  
54 Health Survey (SF-12). Two subscale scores (out of 100) were calculated using the  
55  
56  
57  
58  
59  
60



1  
2  
3 SF-12 software (Version 2; one-week recall) where higher scores indicated better  
4  
5 function,[44].  
6  
7  
8  
9

10 (9) Health-related quality of life was measured using the EQ-5D-5L (EuroQol). The  
11  
12 EQ-5D-5L was calculated as an index score,[45, 46].  
13  
14  
15  
16

## 17 **Data analysis**

18  
19  
20  
21 Feasibility outcomes and participants' demographics were analysed using  
22  
23 descriptive statistics. Clinical outcomes were estimated as changes in activity pacing  
24  
25 and symptoms between T1-T2, T2-T3 and T1-T3 (mean change, 95% confidence  
26  
27 intervals). The validity of the modified APQ-28 was estimated using Cronbach's  
28  
29 alpha and item correlations; and sensitivity analyses explored the effects of including  
30  
31 two new APQ-28 items. Data were analysed using IBM SPSS Statistics 26 statistical  
32  
33 software (IBM Corp, Armonk, New York).  
34  
35  
36  
37  
38  
39

## 40 **Patient and Public Involvement**

41  
42  
43  
44 Patient and Public Involvement (PPI) commenced during the initial planning stages  
45  
46 of the mixed methods programme to develop and test the activity pacing framework.  
47  
48 A meeting with five PPI representatives discussed the study purpose and practical  
49  
50 issues around the proposed methods (online survey, nominal group technique, and  
51  
52 feasibility and acceptability studies). PPI guided on improving the accessibility of  
53  
54 patients' participation and reducing burden (for example, location and duration of  
55  
56 meetings). A PPI representative has acted as an advisor on the study, involving  
57  
58  
59  
60

1  
2  
3 commenting on study documents/questionnaire booklets and coding qualitative  
4  
5 interviews. Acceptability interviews with patients explored practical issues  
6  
7 surrounding the feasibility study,[34] which will further assist the planning of a future  
8  
9 randomised controlled trial (RCT) of activity pacing.  
10  
11  
12  
13

## 14 **RESULTS**

15  
16  
17  
18  
19 Recruitment and T1 data collection commenced in May 2018 and T3 data collection  
20  
21 ended in December 2019 due to attaining the target sample.  
22  
23  
24  
25

### 26 **Demographics**

27  
28  
29  
30  
31 Among the 107 participants who completed the baseline (T1) measures, participants  
32  
33 were predominantly female (n=92, 86.0%) with a mean age of 55.25 +/- 12.83 years.  
34  
35 Low back pain was most frequently reported (n=79, 73.8%) and CFS/ME least  
36  
37 frequently reported (n=12, 11.2%). Sixty-five participants (61.3%) reported two or  
38  
39 more conditions of chronic pain and/or fatigue. Of the 12 participants with CFS/ME,  
40  
41 10 participants reported CFS/ME as their main condition, and 11 reported at least  
42  
43 one co-morbidity of LBP (n=7), chronic widespread pain (n=6), fibromyalgia (n=7) or  
44  
45 another condition (n=3). (See Table 1 for participant demographics and Table 2 for  
46  
47 *baseline scores for activity pacing and symptoms.*)  
48  
49  
50  
51  
52  
53  
54  
55  
56  
57  
58  
59  
60

**Table 1. Participant demographics at baseline (T1)**

|                                                           | <b>Participants who completed T1 but not T2</b> | <b>Participants who completed T1 and T2</b> | <b>Total</b> |
|-----------------------------------------------------------|-------------------------------------------------|---------------------------------------------|--------------|
| <b>Gender</b>                                             | (n=42)                                          | (n=65)                                      | (n=107)      |
| Male                                                      | 6 (14.3%)                                       | 9 (13.8%)                                   | 15 (14.0%)   |
| Female                                                    | 36 (85.7%)                                      | 56 (86.2%)                                  | 92 (86.0%)   |
| <b>Age (years)</b>                                        | (n=41)                                          | (n=65)                                      | (n=106)      |
|                                                           | Mean=56.07                                      | Mean=54.74                                  | Mean=55.25   |
|                                                           | (SD=13.85)                                      | (SD=12.22)                                  | (SD=12.83)   |
| <b>Ethnicity</b>                                          | (n=41)                                          | (n=65)                                      | (n=106)      |
| White (British, Irish, Other)                             | 39 (95.1%)                                      | 60 (92.3%)                                  | 99 (93.4%)   |
| Black (Caribbean, African)                                | 0 (0.0%)                                        | 1 (1.5%)                                    | 1 (0.9%)     |
| Mixed (white/black, white/Asian, other)                   | 1 (2.4%)                                        | 2 (3.1%)                                    | 3 (2.8%)     |
| Asian (Indian, Pakistani, Bangladeshi, other)             | 1 (2.4%)                                        | 2 (3.1%)                                    | 3 (2.8%)     |
| Asian Eastern (Chinese, other)                            | 0 (0.0%)                                        | 0 (0.0%)                                    | 0 (0.0%)     |
| <b>Living situation*</b>                                  | (n=42)                                          | (n=65)                                      | (n=107)      |
| Lives alone                                               | 7 (16.7%)                                       | 10 (15.4%)                                  | 17 (15.9%)   |
| Lives with partner                                        | 25 (59.5%)                                      | 48 (73.8%)                                  | 73 (68.2%)   |
| Lives with children                                       | 16 (38.1%)                                      | 24 (36.9%)                                  | 40 (37.4%)   |
| Other                                                     | 2 (4.8%)                                        | 1 (1.5%)                                    | 3 (2.8%)     |
| <b>Employment</b>                                         | (n=42)                                          | (n=65)                                      | (n=107)      |
| Working (full-time, part-time, in the house, student)     | 13 (31.0%)                                      | 31 (47.7%)                                  | 44 (41.1%)   |
| Not working (due to chronic pain/fatigue/other condition) | 15 (35.7%)                                      | 19 (29.2%)                                  | 34 (31.8%)   |
| Retired/semi-retired                                      | 14 (33.3%)                                      | 14 (21.5%)                                  | 28 (26.2%)   |
| Other                                                     | 0 (0.0%)                                        | 1 (1.5%)                                    | 1 (0.9%)     |

|                                                         |                                   |                                    |                                    |
|---------------------------------------------------------|-----------------------------------|------------------------------------|------------------------------------|
| <b>Conditions*:</b>                                     | (n=41)                            | (n=65)                             | (n=106)                            |
| Low back pain                                           | 30 (73.2%)                        | 49 (75.4%)                         | 79 (74.5%)                         |
| Widespread pain                                         | 19 (46.3%)                        | 33 (50.8%)                         | 52 (49.1%)                         |
| Fibromyalgia                                            | 9 (22.0%)                         | 20 (30.8%)                         | 29 (27.4%)                         |
| CFS/ME                                                  | 6 (14.6%)                         | 6 (9.2%)                           | 12 (11.3%)                         |
| Other                                                   | 9 (22.0%)                         | 12 (18.5%)                         | 21 (19.8%)                         |
| <b>Number of the above conditions:</b>                  | (n=41)                            | (n=65)                             | (n=106)                            |
| 1                                                       | 17 (41.5%)                        | 24 (36.9%)                         | 41 (38.7%)                         |
| 2                                                       | 19 (46.3%)                        | 30 (46.2%)                         | 49 (46.2%)                         |
| 3                                                       | 3 (7.3%)                          | 9 (13.8%)                          | 12 (11.3%)                         |
| 4                                                       | 1 (2.4%)                          | 1 (1.5%)                           | 2 (1.9%)                           |
| 5                                                       | 1 (2.4%)                          | 1 (1.5%)                           | 2 (1.9%)                           |
| <b>Duration of participants' main condition (years)</b> | (n=35)<br>Mean=10.23<br>(SD=9.49) | (n=61)<br>Mean=12.94<br>(SD=11.36) | (n=96)<br>Mean=11.95<br>(SD=10.74) |

\*Patients could select more than one answer.

**Table 2. Baseline scores for activity pacing and symptoms for all patients completing the baseline questionnaires (T1)**

| <b>Measures (range of scores)</b> | <b>Baseline scores for those completed T1 but not T2: Mean (SD)</b> | <b>Baseline scores for those completed T1 and T2: Mean (SD)</b> | <b>Total scores</b>      |
|-----------------------------------|---------------------------------------------------------------------|-----------------------------------------------------------------|--------------------------|
| APQ-28 Activity adjustment (0-4)  | (n=42)<br>1.96 (0.87)                                               | (n=64)<br>1.74 (0.76)                                           | (n=106)<br>1.83 (0.81)   |
| APQ-28 Activity planning (0-4)    | (n=42)<br>1.57 (1.03)                                               | (n=65)<br>1.44 (0.95)                                           | (n=107)<br>1.49 (0.98)   |
| APQ-28 Activity consistency (0-4) | (n=42)<br>1.91 (0.91)                                               | (n=65)<br>1.82 (0.96)                                           | (n=107)<br>1.85 (0.94)   |
| APQ-28 Activity acceptance (0-4)  | (n=42)<br>1.97 (1.02)                                               | (n=65)<br>1.87 (0.84)                                           | (n=107)<br>1.91 (0.92)   |
| APQ-28 Activity progression (0-4) | (n=42)<br>1.59 (1.05)                                               | (n=65)<br>1.45 (0.88)                                           | (n=107)<br>1.51 (0.95)   |
| Current pain (0-10)               | (n=41)<br>6.83 (1.96)                                               | (n=65)<br>6.63 (1.97)                                           | (n=106)<br>6.71 (1.96)   |
| Usual pain (0-10)                 | (n=40)<br>7.72 (1.43)                                               | (n=63)<br>7.30 (1.82)                                           | (n=103)<br>7.47 (1.69)   |
| Physical fatigue (7-28)           | (n=41)<br>14.18 (5.12)                                              | (n=62)<br>15.22 (4.10)                                          | (n=103)<br>14.81 (4.54)  |
| Mental fatigue (4-16)             | (n=42)<br>8.79 (3.22)                                               | (n=64)<br>8.86 (2.77)                                           | (n=106)<br>8.83 (2.94)   |
| Depression (0-27)                 | (n=40)<br>12.63 (7.61)                                              | (n=64)<br>13.66 (6.38)                                          | (n=104)<br>13.26 (6.86)  |
| Anxiety (0-21)                    | (n=41)<br>9.86 (6.64)                                               | (n=65)<br>9.91 (5.47)                                           | (n=106)<br>9.89 (5.92)   |
| Self-efficacy (0-60)              | (n=42)<br>26.26 (13.85)                                             | (n=65)<br>25.29 (10.60)                                         | (n=107)<br>25.67 (11.93) |
| Avoidance (0-25)                  | (n=42)                                                              | (n=64)                                                          | (n=106)                  |

|                           |               |               |               |
|---------------------------|---------------|---------------|---------------|
|                           | 12.95 (6.74)  | 13.27 (5.49)  | 13.14 (5.98)  |
| Physical function (0-100) | (n=42)        | (n=63)        | (n=105)       |
|                           | 33.67 (9.75)  | 34.15 (8.23)  | 33.96 (8.82)  |
| Mental function (0-100)   | (n=42)        | (n=63)        | (n=105)       |
|                           | 42.22 (11.51) | 38.52 (11.10) | 40.00 (11.36) |
| Quality of life (0-1)     | (n=40)        | (n=60)        | (n=100)       |
|                           | 0.41 (0.26)   | 0.43 (0.25)   | 0.42 (0.25)   |

*Activity pacing (28-item Activity Pacing Questionnaire, APQ-28), Pain (Numerical Rating Scale 0-10), Physical/mental fatigue (Chalder Fatigue Questionnaire), Depression (Patient Health Questionnaire-9), Anxiety (Generalised Anxiety Disorder-7), Self-efficacy (Pain Self-Efficacy Questionnaire), Avoidance (Escape and avoidance subscale of the Pain Anxiety Symptoms Scale-20), Physical/mental function (Short-Form 12), Quality of life (EQ-5D-5L index score)*

## Feasibility outcomes

### Recruitment and attrition (Objective 1)

Of the 144 patients invited to participate, 139 were eligible (96.5%). The reasons for ineligibility included: three patients reported only neck pain, one patient reported neck/knee pain and one patient reported thoracic pain. Of the 139 eligible patients, 107 (77.0%) were recruited at T1, 69 (64.5%) completed the six-week programme and 65 (60.7%) completed the T2 measures (attrition rate=39.3%). Fifty-two participants completed T3 (80.0% of T2; attrition rate from T1=51.4%). There were no serious adverse events. (See Figure 2. CONSORT flow diagram.)

Of the 107 participants, the median number of rehabilitation programme sessions attended was five (58.9% participants attended  $\geq 5$  sessions); 83.2% participants attended at least one activity pacing session and 56.1% attended both activity pacing sessions. Of the 65 participants who completed T2, the median number of sessions

1  
2  
3 attended was six (89.2% participants attended  $\geq 5$  sessions); 100% of participants  
4  
5 attended at least one activity pacing specific session and 54 (83.1%) participants  
6  
7 attended both activity pacing sessions. There were no statistically significant  
8  
9 differences between participants who completed T2 or dropped out in terms of  
10  
11 demographics or baseline symptoms. Of the 12 participants with CFS/ME, six  
12  
13 completed T2 (50%) and six completed T3 (100% of T2, 50% of T1); whereas 59 of  
14  
15 the 95 participants without CFS/ME completed T2 (62%) and 46 completed T3 (78%  
16  
17 of T2 and 48% of T1).  
18  
19  
20  
21  
22  
23

### 24 **Acceptability of the rehabilitation programme/questionnaires (Objective 1)**

25  
26  
27  
28 On T2, participants rated their satisfaction of the length and content of the  
29  
30 rehabilitation programme as mean=8.8 (SD=1.7) and 9.1 (SD=1.5) respectively. The  
31  
32 satisfaction of only those participants with CFS/ME was mean=9.0 (SD=0.9) and 9.2  
33  
34 (SD=1.0).  
35  
36  
37  
38  
39

40 There were minimal missing data in the questionnaire booklets (approximately 1%).

41  
42 Some participants wrote comments regarding their perceived benefits of  
43  
44 implementing activity pacing and other coping strategies. Two participants wished for  
45  
46 a longer programme or a follow-up session (*see Figure 3 for examples of*  
47  
48 *participants' comments*).  
49  
50  
51  
52  
53

### 54 **Fidelity to the activity pacing framework (Objective 2)**

1  
2  
3 Each healthcare professional observation demonstrated good adherence to the  
4 framework against a number of key points. Healthcare professionals reported 100%  
5 adherence in their fidelity checklists for each rehabilitation programme. Healthcare  
6 professionals reported that some participants spent over 20 minutes completing the  
7 questionnaire booklet, and that not all patients completed the activity diaries.  
8  
9  
10  
11  
12  
13  
14  
15  
16

### 17 **Interventions between T2 and T3**

18  
19  
20  
21 Of the 52 respondents at T3, two patients received lumbar epidural steroid injections,  
22 one patient had acupuncture, one attended a chiropractor and one patient had knee  
23 surgery.  
24  
25  
26  
27  
28  
29

### 30 **Clinical outcomes**

#### 31 **Validity of the APQ-28 (Objective 3)**

32  
33  
34  
35  
36  
37  
38  
39  
40 At T1, the two new APQ-28 items showed ease of completion through minimal  
41 missing answers (Item APQ12=0 missing answers, Item APQ15=1 missing answer).  
42  
43 The scores of the new items utilised the full range, and the mean scores (Items  
44 APQ12=1.67 and APQ15=1.91) sat within the range of the other APQ-28 items  
45 (mean=1.17-2.78). The new items demonstrated optimal fit with their allocated  
46 subthemes via highest inter-item correlations and item-total correlations (item total  
47 correlations: APQ12 and Activity adjustment,  $r_s(106)=0.76$ ,  $p<0.001$ ; Item APQ15  
48 and Activity acceptance,  $r(106)=0.68$ ,  $p<0.001$ ). The internal consistency for Activity  
49 adjustment increased with the addition of Item APQ12 (Cronbach's alpha=0.86 to  
50  
51  
52  
53  
54  
55  
56  
57  
58  
59  
60



1  
2  
3 0.88), and for Activity acceptance with the addition of Item APQ15 (Cronbach's  
4 alpha=0.68 to 0.72). The internal validity of the other APQ-28 subthemes were:  
5  
6 Activity planning=0.86, Activity consistency=0.80 and Activity progression=0.69.  
7  
8  
9  
10  
11

### 12 **Mean changes in activity pacing and symptoms (Objective 3)**

13  
14  
15  
16

17 Between T1-T2, all five APQ-28 subtheme mean scores increased, indicating  
18 improved activity pacing. There were small reductions in APQ-28 scores between  
19 T2-T3. However, all five subthemes showed overall improvements between T1-T3,  
20 with Activity planning showing the greatest increases (*see Table 3*). Sensitivity  
21 analyses showed marginal increases in mean changes following the addition of the  
22 two new APQ-28 items.  
23  
24  
25  
26  
27  
28  
29  
30  
31  
32  
33  
34  
35  
36  
37  
38  
39  
40  
41  
42  
43  
44  
45  
46  
47  
48  
49  
50  
51  
52  
53  
54  
55  
56  
57  
58  
59  
60

**Table 3. Mean changes in the five subthemes of activity pacing (APQ-28) between T1 (baseline), T2 (end of 6-weeks' treatment) and T3 (3-months' follow-up)**

| Measures                          | T1 mean (SD)<br>T2 mean (SD)                       | T2-T1 mean<br>change (95% CI);<br>Effect size(d) | T2 mean (SD)<br>T3 mean (SD)                       | T3-T2 mean<br>change (95% CI);<br>Effect size(d) | T3 mean<br>T1 mean                                 | T3-T1 mean<br>change (95% CI);<br>Effect size(d) |
|-----------------------------------|----------------------------------------------------|--------------------------------------------------|----------------------------------------------------|--------------------------------------------------|----------------------------------------------------|--------------------------------------------------|
| APQ-28<br>Activity<br>adjustment  | (n=63)<br>T1 mean=1.73(0.77)<br>T2 mean=2.43(0.73) | 0.70 (95% CI=<br>0.48 to 0.91);<br>d=0.91        | (n=51)<br>T2 mean=2.44(0.72)<br>T3 mean=2.32(0.90) | -0.12 (95% CI=<br>-0.36 to 0.11);<br>d=-0.17     | (n=50)<br>T1 mean=1.75(0.78)<br>T3 mean=2.33(0.90) | 0.58 (95% CI=<br>0.33 to 0.83);<br>d=0.74        |
| APQ-28<br>Activity<br>planning    | (n=65)<br>T1 mean=1.44(0.95)<br>T2 mean=2.42(0.87) | 0.99 (95% CI=<br>0.72 to 1.26);<br>d=1.03        | (n=52)<br>T2 mean=2.45(0.87)<br>T3 mean=2.06(1.02) | -0.39 (95% CI=<br>-0.70 to -0.07);<br>d=-0.45    | (n=52)<br>T1 mean=1.42(0.96)<br>T3 mean=2.06(1.02) | 0.64 (95% CI=<br>0.36 to 0.92);<br>d=0.67        |
| APQ-28<br>Activity<br>consistency | (n=65)<br>T1 mean=1.82(0.96)<br>T2 mean=2.65(0.74) | 0.84 (95% CI=<br>0.60 to 1.07);<br>d=0.86        | (n=52)<br>T2 mean=2.66(0.71)<br>T3 mean=2.37(0.72) | -0.29 (95% CI=<br>-0.54 to -0.04);<br>d=-0.41    | (n=52)<br>T1 mean=1.86(1.00)<br>T3 mean=2.37(0.72) | 0.51 (95% CI=<br>0.24 to 0.78);<br>d=0.51        |
| APQ-28<br>Activity<br>acceptance  | (n=65)<br>T1 mean=1.87(0.84)<br>T2 mean=2.55(0.72) | 0.67 (95% CI=<br>0.46 to 0.89);<br>d=0.81        | (n=52)<br>T2 mean=2.57(0.73)<br>T3 mean=2.42(0.95) | -0.15 (95% CI=<br>-0.38 to 0.08);<br>d=-0.21     | (n=52)<br>T1 mean=1.84(0.91)<br>T3 mean=2.42(0.95) | 0.58 (95% CI=<br>0.33 to 0.84);<br>d=0.64        |
| APQ-28<br>Activity<br>progression | (n=65)<br>T1 mean=1.45(0.88)<br>T2 mean=2.39(0.89) | 0.94 (95% CI=<br>0.65 to 1.22);<br>d=1.07        | (n=52)<br>T2 mean=2.40(0.91)<br>T3 mean=2.00(0.91) | -0.40 (95% CI=<br>-0.75 to -0.05);<br>d=-0.44    | (n=52)<br>T1 mean=1.45(0.85)<br>T3 mean=2.00(0.91) | 0.56 (95% CI=<br>0.24 to 0.87);<br>d=0.65        |

*Activity pacing (28-item Activity Pacing Questionnaire, APQ-28); 95% confidence interval (95% CI)*

1  
2  
3 Between T1-T2, the mean scores of all symptoms improved. Current pain reduced  
4 more than usual pain. Physical and mental fatigue both improved, as did self-efficacy  
5 and quality of life. Mental function improved more than physical function. Depression,  
6 anxiety and avoidance all reduced. There was some deterioration in symptoms  
7  
8 between T2-T3, but between T1-T3 all symptoms demonstrated clear improvements  
9  
10 except avoidance (-1.46, 95% CI=-3.02 to 0.10) and physical function (1.62, 95%  
11  
12 CI=-0.81 to 4.06) (see *Table 4.*). Observing only the subgroup of participants with  
13  
14 CFS/ME, improvements were seen between T1-T2 and T1-T3 across all APQ-28  
15  
16 subthemes and symptoms.  
17  
18  
19  
20  
21  
22  
23  
24  
25  
26  
27  
28  
29  
30  
31  
32  
33  
34  
35  
36  
37  
38  
39  
40  
41  
42  
43  
44  
45  
46  
47  
48  
49  
50  
51  
52  
53  
54  
55  
56  
57  
58  
59  
60

**Table 4. Mean changes in measures of symptoms between T1 (baseline), T2 (end of 6-weeks' treatment) and T3 (3-months' follow-up)**

| Measures         | T1 mean (SD)<br>T2 mean (SD)                         | T2-T1 mean<br>change (95% CI);<br>Effect size(d) | T2 mean (SD)<br>T3 mean (SD)                         | T3-T2 mean<br>change (95% CI);<br>Effect size(d) | T3 mean<br>T1 mean                                   | T3-T1 mean<br>change (95% CI);<br>Effect size(d) |
|------------------|------------------------------------------------------|--------------------------------------------------|------------------------------------------------------|--------------------------------------------------|------------------------------------------------------|--------------------------------------------------|
| Current pain     | (n=65)<br>T1 mean=6.63(1.97)<br>T2 mean=5.31(2.38)   | -1.32 (95% CI=<br>-1.91 to -0.74);<br>d=-0.67    | (n=52)<br>T2 mean=5.04(2.36)<br>T3 mean=5.65(2.31)   | 0.62 (95% CI=<br>-0.08 to 1.31);<br>d=0.26       | (n=52)<br>T1 mean=6.58(1.99)<br>T3 mean=5.65(2.31)   | -0.92 (95% CI=<br>-1.58 to -0.27);<br>d=-0.47    |
| Usual pain       | (n=65)<br>T1 mean=7.30(1.82)<br>T2 mean=6.62(2.08)   | -0.68 (95% CI=<br>-1.19 to -0.18);<br>d=-0.37    | (n=51)<br>T2 mean=6.53(2.10)<br>T3 mean=6.55(1.91)   | 0.02 (95% CI=<br>-0.48 to 0.52);<br>d=0.01       | (n=50)<br>T1 mean=7.30(1.62)<br>T3 mean=6.54(1.93)   | -0.76 (95% CI=<br>-1.27 to -0.25);<br>d=-0.47    |
| Physical fatigue | (n=62)<br>T1 mean=15.22(4.10)<br>T2 mean=20.31(3.92) | 5.08 (95% CI=<br>3.95 to 6.21);<br>d=1.24        | (n=51)<br>T2 mean=20.47(4.13)<br>T3 mean=18.12(4.18) | -2.35 (95% CI=<br>-3.44 to -1.26);<br>d=-0.57    | (n=49)<br>T1 mean=15.35(3.90)<br>T3 mean=18.18(4.16) | 2.84 (95% CI=<br>1.34 to 4.33);<br>d=0.73        |
| Mental fatigue   | (n=64)<br>T1 mean=8.86(2.77)<br>T2 mean=11.28(2.43)  | 2.42 (95% CI=<br>1.75 to 3.10);<br>d=0.87        | (n=51)<br>T2 mean=11.45(2.20)<br>T3 mean=10.92(2.34) | -0.53 (95% CI=<br>-1.17 to 0.11);<br>d=-0.24     | (n=51)<br>T1 mean=8.94(2.51)<br>T3 mean=10.92(2.34)  | 1.98 (95% CI=<br>1.33 to 2.64);<br>d=0.79        |
| Depression       | (n=63)<br>T1 mean=13.65(6.44)<br>T2 mean=7.14(6.09)  | -6.51 (95% CI=<br>-7.72 to -5.31);<br>d=-1.01    | (n=51)<br>T2 mean=6.27(5.49)<br>T3 mean=9.23(5.75)   | 2.96 (95% CI=<br>1.64 to 4.29);<br>d=0.54        | (n=51)<br>T1 mean=13.18(6.35)<br>T3 mean=9.09(5.76)  | -4.09 (95% CI=<br>-5.61 to -2.57);<br>d=-0.64    |

|                   |                                                        |                                               |                                                        |                                               |                                                        |                                               |
|-------------------|--------------------------------------------------------|-----------------------------------------------|--------------------------------------------------------|-----------------------------------------------|--------------------------------------------------------|-----------------------------------------------|
| Anxiety           | (n=65)<br>T1 mean=9.91(5.47)<br>T2 mean=5.40(5.13)     | -4.51 (95% CI=<br>-5.60 to -3.42);<br>d=-0.82 | (n=52)<br>T2 mean=4.65(4.47)<br>T3 mean=6.10(5.23)     | 1.44 (95% CI=<br>0.55 to 2.33);<br>d=0.32     | (n=52)<br>T1 mean=9.47(5.06)<br>T3 mean=6.10(5.23)     | -3.37 (95% CI=<br>-4.63 to -2.12);<br>d=-0.67 |
| Self-efficacy     | (n=65)<br>T1 mean=25.29(10.60)<br>T2 mean=36.29(14.12) | 11.00 (95% CI=<br>8.44 to 13.56);<br>d=1.04   | (n=52)<br>T2 mean=37.96(14.12)<br>T3 mean=34.68(14.26) | -3.28 (95% CI=<br>-7.17 to 0.60);<br>d=-0.23  | (n=52)<br>T1 mean=25.85(10.74)<br>T3 mean=34.68(14.26) | 8.83 (95% CI=<br>5.86 to 11.81);<br>d=0.82    |
| Avoidance         | (n=64)<br>T1 mean=13.27(5.49)<br>T2 mean=10.28(5.89)   | -2.98 (95% CI=<br>-4.43 to -1.54);<br>d=-0.54 | (n=52)<br>T2 mean=10.85(5.93)<br>T3 mean=12.12(5.79)   | 1.27 (95% CI=<br>-0.27 to 2.81);<br>d=0.21    | (n=52)<br>T1 mean=13.58(5.66)<br>T3 mean=12.12(5.79)   | -1.46 (95% CI=<br>-3.02 to 0.10);<br>d=-0.26  |
| Physical function | (n=63)<br>T1 mean=34.15(8.23)<br>T2 mean=38.82(9.06)   | 4.67 (95% CI=<br>2.69 to 6.65);<br>d=0.57     | (n=49)<br>T2 mean=39.45(8.72)<br>T3 mean=36.63(9.69)   | -2.82 (95% CI=<br>-5.29 to -0.35);<br>d=-0.32 | (n=47)<br>T1 mean=34.92(7.98)<br>T3 mean=36.55(9.81)   | 1.62 (95% CI=<br>-0.81 to 4.06);<br>d=0.20    |
| Mental function   | (n=63)<br>T1 mean=38.52(11.10)<br>T2 mean=45.83(11.48) | 7.30 (95% CI=<br>4.49 to 10.12);<br>d=0.66    | (n=49)<br>T2 mean=46.75(10.82)<br>T3 mean=44.78(10.44) | -1.97 (95% CI=<br>-5.22 to 1.29);<br>d=-0.18  | (n=47)<br>T1 mean=38.61(10.65)<br>T3 mean=44.56(10.60) | 5.95 (95% CI=<br>2.83 to 9.08);<br>d=0.56     |
| Quality of life   | (n=59)<br>T1 mean=0.43(0.25)<br>T2 mean=0.56(0.28)     | 0.13 (95%<br>CI=0.07 to 0.18);<br>d=0.52      | (n=48)<br>T2 mean=0.60(0.25)<br>T3 mean=0.51(0.28)     | -0.09 (95% CI=<br>-0.14 to -0.03);<br>d=-0.36 | (n=45)<br>T1 mean=0.45(0.24)<br>T3 mean=0.52(0.29)     | 0.07 (95% CI=<br>0.001 to 0.14);<br>d=0.29    |

*Pain (Numerical Rating Scale 0-10), Physical/mental fatigue (Chalder Fatigue Questionnaire), Depression (Patient Health Questionnaire-9), Anxiety (Generalised Anxiety Disorder-7), Self-efficacy (Pain Self-Efficacy Questionnaire), Avoidance (Escape and avoidance subscale of the Pain Anxiety Symptoms Scale-20), Physical/mental function (Short-Form 12), Quality of life (EQ-5D-5L index score); 95% confidence interval (95% CI)*

## DISCUSSION

This study fulfilled the original aims of testing the feasibility and acceptability of using a new activity pacing framework to standardise instructions of activity pacing to assist planning a future effectiveness RCT. The study recruited to target and patients with chronic pain and chronic fatigue demonstrated both improvements in activity pacing strategies and reductions in symptoms.

### Feasibility

The activity pacing framework demonstrated feasibility through excellent fidelity to the framework by healthcare professionals via self-reported checklists and observations. Acceptability was demonstrated through patients' high satisfaction scores. Not all patients completed the activity diaries, however, this was optional for patients to facilitate their own self-reflection.

The recruitment rate (77%) was higher than estimated in the study protocol (50%). This was similar to a study exploring a five-week exercise programme for chronic hip pain (recruitment rate=76%),[47]; and this rate is considered 'Good' using cut-off levels of 80%=excellent and 70%=good from a feasibility study exploring a mind-body physical activity programme for chronic pain,[48]. The attrition rate between T1-T2 (39.3%) was as predicted in the protocol (40%), and lower than the 60% attrition rates reported across other studies investigating programmes for chronic pain,[20]. The attrition rate between T2-T3 (20.0%) was lower than predicted in the protocol (50%), and the target sample size proved feasible to attain. These

1  
2  
3 recruitment/attrition rates will help to plan the progression criteria used in a future  
4  
5 pilot RCT of activity pacing.  
6  
7  
8  
9

10 Regarding treatment adherence, only 56.1% of participants recruited at T1 attended  
11  
12 both activity pacing sessions. Many participants (n=18, 16.8%) dropped out after the  
13  
14 first session and therefore did not attend any activity pacing sessions. Reasons for  
15  
16 early drop-out often include unrealistic expectations of symptom improvement, low  
17  
18 motivation, or confidence to commit to programmes or behavioural changes,[20]. In  
19  
20 comparison, attendance rates of both activity pacing sessions among those who  
21  
22 completed T2 were 83.1%, and 89.2% of participants attended five or more  
23  
24 sessions. This is comparable to adherence rates of 81% seen elsewhere,[47]; and  
25  
26 adherence rates have been considered as 'Excellent' when 70% or more participants  
27  
28 complete 75% of sessions,[48]. However, within the present study, the interpretation  
29  
30 of high attendance rates from those who completed T2 are considered more  
31  
32 modestly following the drop outs after Week 1.  
33  
34  
35  
36  
37  
38  
39

40 Participants reported the condition of low back pain most frequently and CFS/ME the  
41  
42 least frequently, as per current prevalence rates,[49, 50]. Our findings re-iterate the  
43  
44 high occurrence of co-morbidities, and frequent co-existence of chronic pain among  
45  
46 patients with CFS/ME,[9]. Participants with CFS/ME demonstrated improvements in  
47  
48 symptoms following treatment, in comparison to other studies in which pacing has  
49  
50 been ineffective,[31]. Disparate to the study by White et al.,[31], the activity pacing  
51  
52 framework encourages a rehabilitative approach that facilitates increased function  
53  
54 rather than aiming to reduce symptoms. The effects of rehabilitative approaches to  
55  
56  
57  
58  
59  
60

1  
2  
3 activity pacing for patients with both chronic pain and fatigue requires further  
4  
5 investigation using effectiveness trials.  
6  
7  
8  
9

## 10 **Clinical outcomes**

11  
12  
13

14 Activity pacing improved across all APQ-28 subthemes, the largest improvement  
15 being for Activity planning. This theme refers to planning activities, setting time  
16 targets and assessing activity levels,[36]; practical facets of activity pacing which  
17 may be more accessible to change. Comparably, participants showed smaller  
18 improvements in Activity acceptance. This subtheme includes setting realistic goals  
19 and allowing flexibility; facets that involve changing previous behaviours or self-  
20 enforced rules. The APQ-28 detected multidimensional changes in activity pacing,  
21 and the two new items appeared to complement the scale. Further study will fully  
22 validate the APQ-28 in a larger sample and estimate minimally important changes.  
23  
24  
25  
26  
27  
28  
29  
30  
31  
32  
33  
34  
35  
36

37 The aims of the activity pacing framework are to improve patients' function and  
38 quality of life. Improvements in physical function were seen between T1-T2 (mean  
39 change=4.67) that were greater than the minimally clinically important change  
40 (3.29),[51]. There were also reductions in avoidance between T1-T2. It is intended  
41 that the quota-contingent, operant approach of the activity pacing framework  
42 encourages a reduction in avoidance through setting meaningful and realistic goals  
43 towards activity, rather than stopping activities with the aim of reducing/avoiding  
44 symptoms as per energy conservation approaches. Similarly, in a RCT comparing an  
45 operant approach with energy conservation, Racine et al.,[30] found the operant  
46 approach, but not energy conservation was associated with reduced avoidance  
47  
48  
49  
50  
51  
52  
53  
54  
55  
56  
57  
58  
59  
60



1  
2  
3 among patients with fibromyalgia. This, together with greater improvements in  
4 depressive symptoms following the operant approach over energy conservation, led  
5 to recommendations towards the operant approach for patients with  
6 fibromyalgia,[30]. The current study found that pre-post treatment (T1-T2)  
7 improvements in both avoidance and physical function showed some decline at three  
8 months' follow-up. The authors suggest that physical function may be a component  
9 of rehabilitation in which patients feel least confident, especially those with avoidant  
10 behaviours,[20]. This may have implications for future programmes to integrate  
11 follow-up sessions to encourage longer-term maintenance of physical activity. In  
12 comparison, Racine et al.,[30] found improvements in physical activity following both  
13 operant pacing and energy conservation approaches. Similarly to the present study,  
14 Racine et al.,[30] implemented handouts, homework and goal setting to encourage  
15 patients' uptake of activity pacing. However, both of the interventions explored by  
16 Racine et al.,[30] were of greater duration than the current study, comprising of 10  
17 two-hour stand-alone pacing sessions with a 3-month booster session. Within the  
18 current study, improvements in mental function between T1-T2 (mean change=7.3)  
19 were better maintained between T1-T3 (mean change=5.95); and both higher than  
20 the minimally clinically important change (3.77),[51]. Quality of life also improved  
21 between T1-T2 (mean change=0.13) and much of this improvement was maintained  
22 between T1-T3 (mean change=0.07); both changes exceeded the minimally  
23 important difference (0.037 +/-0.008),[52].

24  
25  
26 The activity pacing framework additionally aims to increase patients' self-efficacy.  
27 Improvements in self-efficacy were found between T1 (mean=25.29) and T2  
28 (mean=36.29), which were well maintained at T3 (mean=34.68). Scores were lower  
29  
30

1  
2  
3 than the  $\geq 40$  cut off. However, an improvement of  $> 5.5$  was attained which is  
4  
5 considered a minimally important change,[53]. Both physical and mental fatigue  
6  
7 improved, and improvements in mental fatigue appeared to be better maintained at  
8  
9 T3. Comparisons to minimally important changes are unavailable.  
10  
11  
12  
13

14 Psychological health improved following the rehabilitation programme, including  
15  
16 reduced depression scores from moderate to mild (T1=13.7, T2=7.1, T3=9.1); with a  
17  
18 clinically significant reduction ( $\geq 5$ ) between T1-T2,[40]. Mean anxiety scores reduced  
19  
20 (T1=9.9, T2=5.4 and T3=6.10), and remained within the classification of mild  
21  
22 anxiety,[41]. Although reductions in pain were not a direct aim of the current  
23  
24 treatment, lower pain severity was reported. Despite the increased intensity of  
25  
26 pacing sessions contained within the RCT comparing the operant approach to  
27  
28 energy conservation, Racine et al.,[30] found that neither pacing approach effectively  
29  
30 reduced symptoms of pain or fatigue.  
31  
32  
33  
34  
35  
36  
37

### 38 **Strengths and limitations**

39  
40  
41  
42 This study was an early feasibility study that primarily aimed to explore whether a  
43  
44 new activity pacing framework could be implemented in the clinical setting. Whilst  
45  
46 this study fulfilled its original aims, it is limited by the absence of *a priori* progression  
47  
48 criteria. However, the findings from this study will help to inform the progression  
49  
50 criteria that are used to determine whether to progress to a full clinical trial from a  
51  
52 future pilot RCT. Despite recruiting to target, this sample was not powered with a  
53  
54 control arm to determine treatment effectiveness. As per other studies exploring  
55  
56 activity pacing, activity pacing was instructed as one component of the rehabilitation  
57  
58  
59  
60

1  
2  
3 programme,[5]. Therefore, improvements in symptoms may have resulted from any  
4 combination of coping strategies. A future RCT will implement a suitable control to  
5 explore the effects of activity pacing, while implementing the activity pacing  
6 framework in a clinically relevant setting, including alongside other coping strategies.  
7  
8  
9  
10  
11  
12  
13

14 The generalisability of this study is limited to a sample of predominantly females and  
15 white ethnic origin. Recruitment occurred only at one Pain Service and this service  
16 had an existing rehabilitation programme for both chronic pain and fatigue. Bias may  
17 have arisen through the lead researcher delivering the healthcare professionals'  
18 training and undertaking the observations. Further work will test the activity pacing  
19 framework and study protocol across other healthcare services and explore  
20 feasibility and fidelity over wider geographical locations.  
21  
22  
23  
24  
25  
26  
27  
28  
29  
30  
31  
32

33 It is unknown what potential bias was caused by the attrition rate. However, there  
34 were no differences at baseline between those who completed the programme and  
35 those who dropped out. It is possible that patients who completed T2 and T3  
36 possibly felt greater benefits from the treatment and were more motivated to respond  
37 to the follow-up questionnaires. The attrition rate may be reflective of some of the  
38 clinical challenges and missed appointments surrounding the complexity of chronic  
39 pain/fatigue. Further research could explore whether providing a follow-up treatment  
40 session improves commitment to activity pacing.  
41  
42  
43  
44  
45  
46  
47  
48  
49  
50  
51  
52

### 53 **Modifications for future study**

54  
55  
56  
57  
58  
59  
60

1  
2  
3 Since more patients completed the T1 questionnaires during the rehabilitation  
4 sessions than at home, this may be the preferable mode of distribution of paper  
5 questionnaires. To lessen the time taken to complete the questionnaires, the PASS-  
6 20 may be considered for exclusion in future study. The whole 20-item PASS scale  
7 was included for reliability and validity, but data specifically from the Escape and  
8 Avoidance subscale was explored. Modifications to the inclusion criteria may include  
9 patients with any chronic spinal pain, including cervical/thoracic pain due to the  
10 frequent and similar presentation at rehabilitation services.  
11  
12  
13  
14  
15  
16  
17  
18  
19  
20  
21  
22

## 23 **Conclusion**

24  
25  
26  
27  
28 To the authors' knowledge, this is the first study to explore the clinical utility of a  
29 comprehensive activity pacing framework developed for both chronic pain and  
30 chronic fatigue. The newly developed activity pacing framework proved feasible to  
31 use clinically by healthcare professionals. Patients with both chronic pain and fatigue  
32 implemented greater activity pacing strategies following treatment, alongside  
33 reporting improvements in quality of life, psychological wellbeing, self-efficacy, pain  
34 and fatigue. Physical function and avoidance improved to a lesser extent and for the  
35 shorter-term. Future study will use the activity pacing framework in an effectiveness  
36 RCT to explore the effects of activity pacing on symptoms.  
37  
38  
39  
40  
41  
42  
43  
44  
45  
46  
47  
48  
49  
50

## 51 **ACKNOWLEDGEMENTS**

52  
53  
54  
55  
56  
57  
58  
59  
60

1  
2  
3 We would like to acknowledge all of the patients and healthcare professionals who  
4 were involved in this study. We would also like to acknowledge our statistical  
5 support.  
6  
7  
8  
9

## 10 11 12 **CONFLICT OF INTEREST**

13  
14  
15  
16  
17 All authors declare no conflicts of interest  
18  
19

## 20 21 **AUTHOR CONTRIBUTIONS**

22  
23  
24  
25  
26 DA, AMK, PK, SW and LMc all contributed to the conception and design of the study.  
27  
28 DA undertook the acquisition of the data. DA, AMK, PK, SW and LMc all contributed  
29 to the analysis and interpretation of data. DA, AMK, PK, SW and LMc contributed to  
30 drafting the manuscript and revising it critically for important intellectual content and  
31  
32  
33  
34  
35  
36  
37 have approved the final version for publication. DA, AMK, PK, SW and LMc are in  
38  
39  
40 agreement to be accountable for all aspects of the work in ensuring that questions  
41  
42  
43  
44 related to the accuracy or integrity of any part of the work are appropriately  
45  
46  
47 investigated and resolved.  
48  
49  
50  
51  
52  
53

## 54 **PATIENT CONSENT FOR PUBLICATION**

55  
56  
57  
58 Not required.  
59  
60

## **DATA SHARING AGREEMENT**

De-identified participant data are available from the corresponding author (Deborah.Antcliff@nca.nhs.uk) upon reasonable request. Re-use is permitted for health and care research as long as the original authors are acknowledged. The protocol can also be requested from the author or accessed at ClinicalTrials.gov (NCT03497585).

## **ETHICAL APPROVAL**

Ethical approval was granted by the London-Surrey Research Ethics Committee (18/LO/0655).

## **DISCLAIMER**

This paper presents independent research funded by Health Education England/National Institute for Health Research (NIHR) [Clinical Lectureship (ICA-CL-2015-01-019)]. The views expressed are those of the author(s) and not necessarily those of the NHS, the NIHR or the Department of Health and Social Care.

## **SOURCES OF FUNDING**

This work was supported by a Health Education England/National Institute for Health Research (HEE/NIHR) Clinical Lectureship (grant number: ICA-CL-2015-01-019).

## REFERENCES

1. Torrance N, Smith BH, Elliott AM, et al. Potential Pain Management Programmes in primary care. A UK-wide questionnaire and Delphi survey of experts. *Fam Pract* 2011;28:41-8.
2. Nijs J, Meeus M, De Meirleir K. Chronic musculoskeletal pain in chronic fatigue syndrome: recent developments and therapeutic implications. *Man Ther* 2006;11:187-91.
3. Nielson WR, Jensen MP, Karsdorp PA, et al. Activity pacing in chronic pain: concepts, evidence, and future directions. *Clin J Pain* 2013;29:461-8.
4. Antcliff D, Keenan AM, Keeley P, et al. Survey of activity pacing across healthcare professionals informs a new activity pacing framework for chronic pain/fatigue. *Musculoskeletal Care* 2019;17:335-45.
5. Abonie US, Sandercock GRH, Heesterbeek M, et al. Effects of activity pacing in patients with chronic conditions associated with fatigue complaints: a meta-analysis. *Disabil Rehabil* 2020;42:613-22.
6. Aggarwal VR, McBeth J, Zakrzewska JM, et al. The epidemiology of chronic syndromes that are frequently unexplained: do they have common associated factors? *Int J Epidemiol* 2006;35:468-76.
7. Meeus M, Nijs J. Central sensitization: a biopsychosocial explanation for chronic widespread pain in patients with fibromyalgia and chronic fatigue syndrome. *Clin Rheumatol* 2007;26:465-73.
8. Davis LL, Kroenke K, Monahan P, et al. The SPADE Symptom Cluster in Primary Care Patients With Chronic Pain. *Clin J Pain* 2016;32:388-93.

- 1  
2  
3 9. Meeus M, Nijs J, Meirleir KD. Chronic musculoskeletal pain in patients with the  
4 chronic fatigue syndrome: a systematic review. *Eur J Pain* 2007;11:377-86.  
5  
6
- 7 10. Tavel ME. Somatic symptom disorders without known physical causes: one  
8 disease with many names? *Am J Med* 2015;128:1054-8.  
9
- 10 11. Yunus MB. Fibromyalgia and overlapping disorders: the unifying concept of  
11 central sensitivity syndromes. *Semin Arthritis Rheum* 2007;36:339-56.  
12
- 13 12. Nijs J, Meeus M, Van Oosterwijck J, et al. In the mind or in the brain? Scientific  
14 evidence for central sensitisation in chronic fatigue syndrome. *Eur J Clin Invest*  
15 2012;42:203-12.  
16
- 17 13. Arendt-Nielsen L, Morlion B, Perrot S, et al. Assessment and manifestation of  
18 central sensitisation across different chronic pain conditions. *Eur J Pain*  
19 2018;22:216-241.  
20
- 21 14. Vlaeyen JW, Linton SJ. Fear-avoidance and its consequences in chronic  
22 musculoskeletal pain: a state of the art. *Pain* 2000;85:317-32.  
23
- 24 15. Moseley GL. A pain neuromatrix approach to patients with chronic pain. *Man*  
25 *Ther* 2003;8:130-40.  
26
- 27 16. Ericsson A, Mannerkorpi K. How to manage fatigue in fibromyalgia:  
28 nonpharmacological options. *Pain Manag* 2016;6:331-8.  
29
- 30 17. British Pain Society. Guidelines for pain management programmes for adults.  
31 London: British Pain Society, 2013.  
32
- 33 18. Beissner K, Henderson CR, Jr., Papaleontiou M, et al. Physical therapists' use of  
34 cognitive-behavioral therapy for older adults with chronic pain: a nationwide survey.  
35 *Phys Ther* 2009;89:456-69.  
36
- 37 19. Booth J, Moseley GL, Schiltenswolf M, et al. Exercise for chronic musculoskeletal  
38 pain: A biopsychosocial approach. *Musculoskeletal Care* 2017;15:413-421.  
39  
40  
41  
42  
43  
44  
45  
46  
47  
48  
49  
50  
51  
52  
53  
54  
55  
56  
57  
58  
59  
60



- 1  
2  
3 20. Anderson RJ, Hurley RW, Staud R, et al. Cognitive-motivational influences on  
4 health behavior change in adults with chronic pain. *Pain Med* 2016;17:1079-1093.  
5  
6  
7 21. Birkholtz M, Aylwin L, Harman RM. Activity pacing in chronic pain management:  
8 One aim, but which method? Part one: Introduction and literature review. *British*  
9  
10  
11  
12  
13  
14  
15 22. Abonie US, Edwards AM, Hettinga FJ. Optimising activity pacing to promote a  
16 physically active lifestyle in medical settings: A narrative review informed by clinical  
17 and sports pacing research. *J Sports Sci* 2020;38:590-596.  
18  
19  
20  
21 23. Jamieson-Lega K, Berry R, Brown CA. Pacing: A concept analysis of a chronic  
22 pain intervention. *Pain Res Manag* 2013;18:207-13.  
23  
24  
25  
26 24. Andrews NE, Deen M. Defining Activity Pacing: Is It Time to Jump Off the Merry-  
27 Go-Round? *J Pain* 2016;17:1359-1362.  
28  
29  
30  
31 25. Andrews NE, Strong J, Meredith PJ. Activity pacing, avoidance, endurance, and  
32 associations with patient functioning in chronic pain: a systematic review and meta-  
33 analysis. *Arch Phys Med Rehabil* 2012;93:2109-2121 e7.  
34  
35  
36  
37 26. Murphy SL, Clauw DJ. Activity pacing: what are we measuring and how does  
38 that relate to intervention? *Pain* 2010;149:582-583.  
39  
40  
41  
42 27. Craig P, Dieppe P, Macintyre S, et al. Developing and evaluating complex  
43 interventions: The new Medical Research Council guidance. *BMJ* 2008;337:a1655.  
44  
45  
46  
47 doi: 10.1136/bmj.a1655  
48  
49 28. Creswell JW, Piano-Clark VL. *Designing and conducting mixed methods*  
50  
51  
52  
53  
54 29. Antcliff D, Keenan AM, Keeley P, et al. Engaging stakeholders to refine an  
55 activity pacing framework for chronic pain/fatigue: A nominal group technique.  
56  
57  
58  
59  
60

- 1  
2  
3 30. Racine M, Jensen MP, Harth M, et al. Operant Learning Versus Energy  
4 Conservation Activity Pacing Treatments in a Sample of Patients With Fibromyalgia  
5 Syndrome: A Pilot Randomized Controlled Trial. *J Pain* 2019;20:420-439.  
6  
7  
8  
9  
10 31. White PD, Goldsmith KA, Johnson AL, et al. Comparison of adaptive pacing  
11 therapy, cognitive behaviour therapy, graded exercise therapy, and specialist  
12 medical care for chronic fatigue syndrome (PACE): a randomised trial. *Lancet*  
13 2011;377:823-36.  
14  
15  
16  
17  
18 32. Lancaster GA and Thabane L. Guidelines for reporting non-randomised pilot and  
19 feasibility studies. *Pilot Feasibility Stud* 2019;5:114.  
20  
21  
22  
23 33. Eldridge SM, Chan CL, Campbell MJ, et al. CONSORT 2010 statement:  
24 extension to randomised pilot and feasibility trials. *BMJ* 2016;355:i5239.  
25  
26  
27  
28 34. Antcliff D, Keenan AM, Keeley P, et al. "Pacing does help you get your life back":  
29 The acceptability of a newly developed activity pacing framework for chronic  
30 pain/fatigue. *Musculoskeletal Care* 2021 [ePub ahead of print]  
31 doi.org/10.1002/msc.1557  
32  
33  
34  
35  
36  
37 35. Sim J, Lewis M. The size of a pilot study for a clinical trial should be calculated in  
38 relation to considerations of precision and efficiency. *J Clin Epidemiol* 2012;65:301-  
39 8.  
40  
41  
42  
43  
44 36. Antcliff D, Campbell M, Woby S, et al. Assessing the Psychometric Properties of  
45 an Activity Pacing Questionnaire for Chronic Pain and Fatigue. *Phys Ther*  
46 2015;95:1274-86.  
47  
48  
49  
50 37. Jensen MP, Turner JA, Romano JM. What is the maximum number of levels  
51 needed in pain intensity measurement? *Pain* 1994;58:387-92.  
52  
53  
54 38. Chalder T, Berelowitz G, Pawlikowska T, et al. Development of a fatigue scale. *J*  
55 *Psychosom Res* 1993;37:147-53.  
56  
57  
58  
59  
60

- 1  
2  
3 39. Kroenke K, Spitzer RL, Williams JB. The PHQ-9: validity of a brief depression  
4 severity measure. *J Gen Intern Med* 2001;16:606-13.  
5  
6  
7  
8 40. Kroenke K, Spitzer RL, Williams JB, et al. The Patient Health Questionnaire  
9 Somatic, Anxiety, and Depressive Symptom Scales: a systematic review. *Gen Hosp*  
10 *Psychiatry* 2010;32:345-59.  
11  
12  
13  
14 41. Spitzer RL, Kroenke K, Williams JB, et al. A brief measure for assessing  
15 generalized anxiety disorder: the GAD-7. *Arch Intern Med* 2006;166:1092-7.  
16  
17  
18  
19 42. Nicholas MK. The pain self-efficacy questionnaire: Taking pain into account. *Eur*  
20 *J Pain* 2007;11:153-63.  
21  
22  
23  
24 43. McCracken LM, Dhingra L. A short version of the Pain Anxiety Symptoms Scale  
25 (PASS-20): preliminary development and validity. *Pain Res Manag* 2002;7:45-50.  
26  
27  
28  
29 44. Ware J, Jr., Kosinski M, Keller SD. A 12-Item Short-Form Health Survey:  
30 construction of scales and preliminary tests of reliability and validity. *Medical Care*  
31 1996;34:220-33.  
32  
33  
34  
35 45. Herdman M, Gudex C, Lloyd A, et al. Development and preliminary testing of the  
36 new five-level version of EQ-5D (EQ-5D-5L). *Qual Life Res* 2011;20:1727-36.  
37  
38  
39  
40 46. van Hout B, Janssen MF, Feng Y, et al. Interim Scoring for the EQ-5D-5L:  
41 Mapping the EQ-5D-5L to EQ-5D-3L Value Sets. *Value in Health* 2012;15:708 –715.  
42  
43  
44  
45 47. Bearne LM, Walsh NE, Jessep S, et al. Feasibility of an exercise-based  
46 rehabilitation programme for chronic hip pain. *Musculoskeletal Care* 2011;9:160-8.  
47  
48  
49  
50 48. Greenberg J, Lin A, Zale EL, et al. Development And Early Feasibility Testing Of  
51 A Mind-Body Physical Activity Program For Patients With Heterogeneous Chronic  
52 Pain; The GetActive Study. *J Pain Res* 2019;12:3279-3297.  
53  
54  
55  
56 49. Hartvigsen J, Hancock MJ, Kongsted A, et al. What low back pain is and why we  
57 need to pay attention. *Lancet* 2018;391:2356-67.  
58  
59  
60

1  
2  
3 50. NICE. Chronic fatigue syndrome/myalgic encephalomyelitis (or encephalopathy).  
4  
5

6 *NICE Clinical Guideline 53 London 2007.*

7  
8 51. Diaz-Arribas MJ, Fernandez-Serrano M, Royuela A, et al. Minimal Clinically  
9  
10 Important Difference in Quality of Life for Patients With Low Back Pain. *Spine (Phila*  
11  
12 *Pa 1976)* 2017;42:1908-1916.  
13

14  
15 52. McClure NS, Sayah FA, Xie F, et al. Instrument-Defined Estimates of the  
16  
17 Minimally Important Difference for EQ-5D-5L Index Scores. *Value Health*  
18  
19 2017;20:644-650.  
20

21  
22 53. Chiarotto A, Vanti C, Cedraschi C, et al. Responsiveness and Minimal Important  
23  
24 Change of the Pain Self-Efficacy Questionnaire and Short Forms in Patients With  
25  
26 Chronic Low Back Pain. *J Pain* 2016;17:707-18.  
27  
28  
29

### 30 31 **FIGURE LEGENDS**

32  
33 Figure 1. Activity pacing conceptual model taken from the activity pacing framework

34  
35 Figure 2: CONSORT diagram showing the flow of participants through the study

36  
37 Figure 3. Participants' written comments following attending the rehabilitation  
38  
39 programme  
40  
41  
42  
43  
44  
45  
46  
47  
48  
49  
50  
51  
52  
53  
54  
55  
56  
57  
58  
59  
60

1  
2  
3  
4  
5  
6  
7  
8  
9  
10  
11  
12  
13  
14  
15  
16  
17  
18  
19  
20  
21  
22  
23  
24  
25  
26  
27  
28  
29  
30  
31  
32  
33  
34  
35  
36  
37  
38  
39  
40  
41  
42  
43  
44  
45  
46  
47  
48  
49  
50  
51  
52  
53  
54  
55  
56  
57  
58  
59  
60

This framework uses the term 'Activity Pacing', which may be more similar to an operant approach, driven by quota-contingency rather than symptom-contingency. Our model of pacing moves beyond a purely behavioural approach since it also integrates thoughts and beliefs. Activity pacing within this framework encourages acceptance, active decision-making and flexibility, both in selecting which facets of pacing to implement and also when to pace.

This pacing model is based upon addressing behaviours such as fear-avoidance, excessive persistence and overactivity-underactivity cycling. This pacing model includes the potential for reversibility of some of the consequences of chronic pain/fatigue, for example, to reduce disability. As such, activity pacing is described as a rehabilitative strategy rather than an adaptive strategy in this framework.

In keeping with a rehabilitative approach, the aims of activity pacing within this framework include: improved physical and cognitive function, improved quality of life, increased sense of control and choice, and increased satisfaction with activities. Activity pacing may improve the management and ability to cope with symptoms where there is greater acceptance and flexibility. This framework does not advocate the use of activity pacing with the direct aim of reducing symptoms when this results in decreased function or dissatisfaction, or if this encourages avoidant behaviour/working below tolerance levels.

This activity pacing framework recognises pacing as a multidimensional concept that involves different facets, such as breaking down tasks, finding baselines of tolerable activities, implementing consistent levels of activities, planning activities, setting goals of meaningful activities, accepting activity levels and gradually increasing activities. Different facets of activity pacing are tailored to individuals' needs, aims and activity behaviours.

*Figure 1. Activity pacing conceptual model taken from the activity pacing framework*

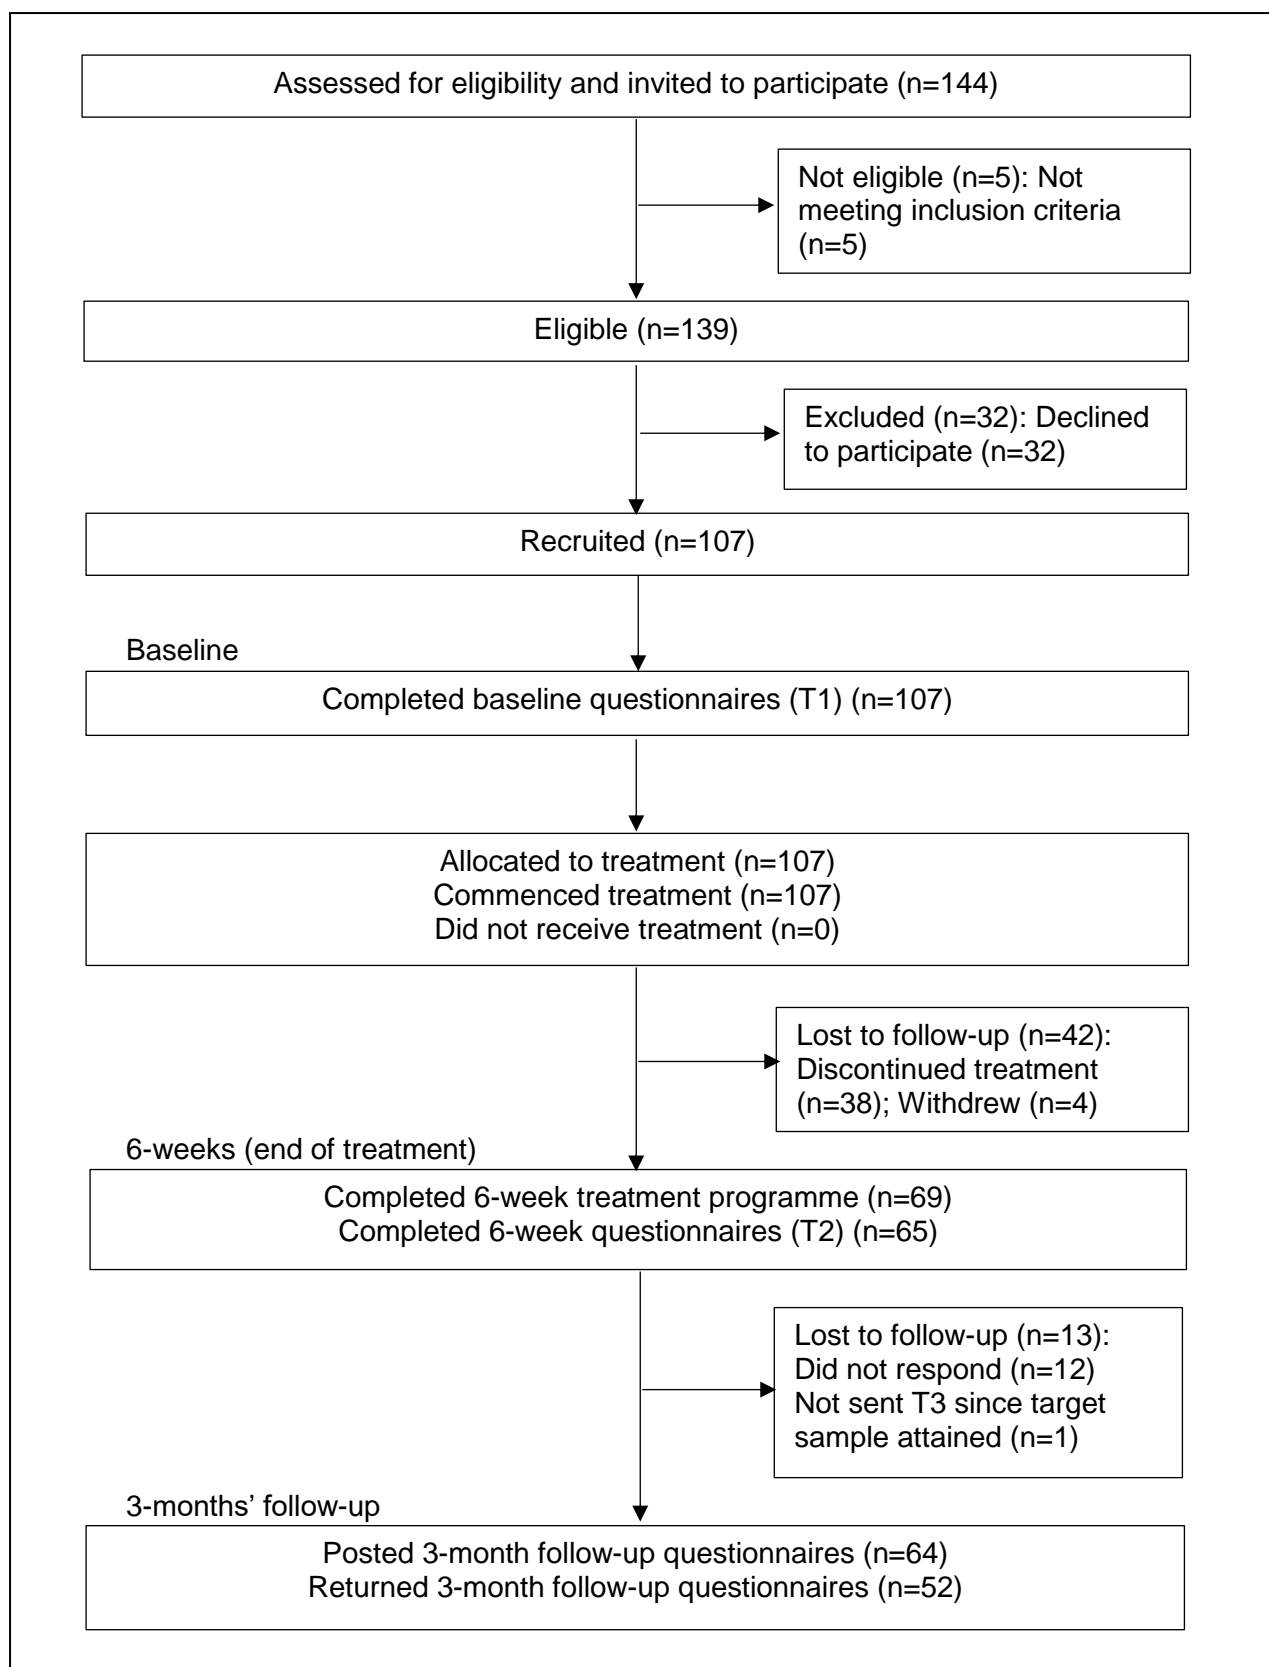

Figure 2: CONSORT diagram showing the flow of participants through the study

1  
2  
3  
4 T2: "The pace and content has been good for me. It has helped me to focus on  
5 my belief that I have to own the situation, to be positive and to make use of the  
6 tools we have discussed. If I don't take this approach I believe my situation will  
7 not improve. There is no magic wand, but I can be the difference." (F070:  
8  
9

10 *Fibromyalgia*)  
11  
12

13  
14 T3: "I have found pacing really helpful in my everyday life and feel I can achieve  
15 more day to day than 12 months ago." (F006: *chronic widespread pain,*  
16 *fibromyalgia, chronic fatigue syndrome/myalgic encephalomyelitis*)  
17  
18

19  
20  
21 T3: "I found the pain service very helpful and informative. How I view my pain and  
22 react to and manage it has improved. Emotionally, I feel more positive as a result  
23 of using strategies learned, and also more confident that I can manage my pain  
24 and how it makes me feel. Using pacing and realistic goals has enabled me to do  
25 some activities that I previously avoided i.e. hoovering, changing the bed. (F068:  
26 *fibromyalgia*)  
27  
28  
29  
30

31  
32  
33 T3: "Doing the 6 week course was extremely helpful and gave me some excellent  
34 information and resources to work with. The difficulty has been that there has  
35 been no follow up or support sessions since. It is great having the info, but then  
36 you are battling depression/anxiety it is difficult to apply knowledge without some  
37 support, even if that is over the phone every few weeks or maybe a support group  
38 facility." (F075: *low back pain, chronic widespread pain*)  
39  
40  
41  
42

43  
44  
45 T3 "I have found 'pacing' a very good way to manage pain and get through the  
46 day completing activities" (F105: *low back pain, chronic widespread pain,*  
47 *fibromyalgia*)  
48  
49  
50

51  
52  
53 *Figure 3. Participants' written comments following attending the rehabilitation*  
54 *programme*  
55  
56  
57  
58  
59  
60

## SUPPLEMENTARY MATERIAL

**Supplementary Figure 1. Content of the Activity Pacing Framework: Overview and Theory, and Appendices and Teaching Guide booklets****A. Overview and Theory**

## 1. Glossary

## 2. Introduction:

Why is an activity pacing framework needed?

How has the activity pacing framework been developed?

## 3. Definition of activity pacing

## 4. Aims of pacing

Examples of aims of pacing and their clinical application

## 5. Who can benefit from pacing?

## 6. Activity behaviours:

Avoidance behaviour/fear-avoidance

Over-exertion/excessive persistence

Boom-bust/overactivity-underactivity cycling

## 7. Quota-contingent and symptom-contingent pacing

## 8. Models of pacing:

Operant approach

Energy conservation

Activity pacing framework model of pacing

## 9. Facets of pacing:

Facets of pacing, broader pacing themes and individuals who may benefit

Facets of pacing that are not endorsed for routine use, but may be considered during a flare-up of symptoms

## 10. Getting started with pacing: stages of pacing

## 11. Potential barriers to pacing:

Addressing barriers

## 12. How pacing relates to other coping strategies

Pacing and graded exercise/graded activity

Pacing and cognitive behavioural therapy

Pacing and acceptance and commitment therapy

Pacing and mindfulness

Pacing and relaxation



## SUPPLEMENTARY MATERIAL

- 1  
2  
3 Pacing and sleep hygiene  
4 Pacing and other strategies  
5  
6  
7 13. Pacing aids  
8 Activity diaries  
9  
10 Goal setting  
11  
12

**B. Appendices and teaching guide***Part 1. Conceptual model of pacing*

15  
16  
17 Appendix 1. Activity pacing and the fear-avoidance model

18  
19 Appendix 2. Pacing as a health behaviour:

20 The Health Action Process Approach (HAPA)

21 The Transtheoretical model  
22  
23  
24

*Part 2. Pacing guide for healthcare professionals*

25  
26  
27 Appendix 3. Chronic pain/fatigue cycle

28  
29 Appendix 4. Overactivity-underactivity (boom-bust) cycle:

30 Boom-bust, avoidance and excessive persistence behaviours

31  
32 Appendix 5. Activity pacing framework model of pacing

33  
34 Appendix 6. Facets of pacing:

35 Facets of pacing, explanation/examples and who may benefit

36  
37 Appendix 7. Stages of pacing

38  
39 Appendix 8. Patient exemplars:

40 Avoidance

41 Excessive persistence

42 Boom-bust

43 Patients who are predominantly bedbound  
44  
45

46  
47 Appendix 9. Questions for healthcare professionals to ask patients:

48 Exploring current patterns of activity

49 Exploring current baselines of activity

50 Exploring possible barriers to pacing

51 Exploring individuals' aims  
52  
53  
54  
55  
56  
57

*Part 3. Pacing tools*

58  
59 Appendix 10. Activity diary:  
60

## SUPPLEMENTARY MATERIAL

Blank activity diary and example of a completed diary

Appendix 11. Goal setting

Appendix 12. Checklist for health care professionals

Appendix 13. References

For peer review only

## SUPPLEMENTARY MATERIAL

Supplementary Table 1. CONSORT checklist

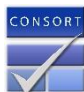

## CONSORT 2010 checklist of information to include when reporting a pilot or feasibility trial\*

| Section/Topic             | Item No | Checklist item                                                                                                                                      | Reported on page No                                                                                                                         |
|---------------------------|---------|-----------------------------------------------------------------------------------------------------------------------------------------------------|---------------------------------------------------------------------------------------------------------------------------------------------|
| <b>Title and abstract</b> |         |                                                                                                                                                     |                                                                                                                                             |
|                           | 1a      | Identification as a pilot or feasibility randomised trial in the title                                                                              | Title page<br>(Page 1)                                                                                                                      |
|                           | 1b      | Structured summary of pilot trial design, methods, results, and conclusions (for specific guidance see CONSORT abstract extension for pilot trials) | The abstract is structured as per the <i>BMJ Open</i> format, but it contains the information as per the CONSORT checklist.<br><br>(Page 3) |
| <b>Introduction</b>       |         |                                                                                                                                                     |                                                                                                                                             |
| Background and objectives | 2a      | Scientific background and explanation of rationale for future definitive trial, and reasons for randomised pilot trial                              | Pages 5-7                                                                                                                                   |
|                           | 2b      | Specific objectives or research questions for pilot trial                                                                                           | Page 7                                                                                                                                      |

## SUPPLEMENTARY MATERIAL

| <b>Methods</b> |    |                                                                                                                                                              |                                                                                                                                          |
|----------------|----|--------------------------------------------------------------------------------------------------------------------------------------------------------------|------------------------------------------------------------------------------------------------------------------------------------------|
| Trial design   | 3a | Description of pilot trial design (such as parallel, factorial) including allocation ratio                                                                   | Page 8                                                                                                                                   |
|                | 3b | Important changes to methods after pilot trial commencement (such as eligibility criteria), with reasons                                                     | This was not a pilot trial that ran into a RCT. Any suggested modifications following this feasibility study are included on Pages 32-33 |
| Participants   | 4a | Eligibility criteria for participants                                                                                                                        | Page 9                                                                                                                                   |
|                | 4b | Settings and locations where the data were collected                                                                                                         | Page 11                                                                                                                                  |
|                | 4c | How participants were identified and consented                                                                                                               | Page 8                                                                                                                                   |
| Interventions  | 5  | The interventions for each group with sufficient details to allow replication, including how and when they were actually administered                        | Pages 9-11 and Supplementary Figures 1-2                                                                                                 |
| Outcomes       | 6a | Completely defined prespecified assessments or measurements to address each pilot trial objective specified in 2b, including how and when they were assessed | Pages 11-14                                                                                                                              |
|                | 6b | Any changes to pilot trial assessments or measurements after the pilot trial commenced, with reasons                                                         | This was not a pilot trial that ran into a RCT. Any suggested                                                                            |

SUPPLEMENTARY MATERIAL

|             |    |                                                                                                             |                                                                                                                                     |
|-------------|----|-------------------------------------------------------------------------------------------------------------|-------------------------------------------------------------------------------------------------------------------------------------|
|             |    |                                                                                                             | modifications following this feasibility study are included on Pages 32-33                                                          |
|             | 6c | If applicable, prespecified criteria used to judge whether, or how, to proceed with future definitive trial | N/A. This was not a pilot trial that ran into a RCT. There were no prespecified criteria in this single-arm feasibility study       |
| Sample size | 7a | Rationale for numbers in the pilot trial                                                                    | Page 9                                                                                                                              |
|             | 7b | When applicable, explanation of any interim analyses and stopping guidelines                                | This was not a pilot trial that ran into a RCT. No interim analyses or stopping guidelines were included in this feasibility study. |

For peer review only

1  
2  
3  
4  
5  
6  
7  
8  
9  
10  
11  
12  
13  
14  
15  
16  
17  
18  
19  
20  
21  
22  
23  
24  
25  
26  
27  
28  
29  
30  
31  
32  
33  
34  
35  
36  
37  
38  
39  
40  
41  
42  
43  
44  
45  
46

## SUPPLEMENTARY MATERIAL

|                                  |     |                                                                                                                                                                                             |                                                                 |
|----------------------------------|-----|---------------------------------------------------------------------------------------------------------------------------------------------------------------------------------------------|-----------------------------------------------------------------|
| Randomisation:                   |     |                                                                                                                                                                                             |                                                                 |
| Sequence generation              | 8a  | Method used to generate the random allocation sequence                                                                                                                                      | There was no randomisation in this single-arm feasibility study |
|                                  | 8b  | Type of randomisation(s); details of any restriction (such as blocking and block size)                                                                                                      | There was no randomisation in this single-arm feasibility study |
| Allocation concealment mechanism | 9   | Mechanism used to implement the random allocation sequence (such as sequentially numbered containers), describing any steps taken to conceal the sequence until interventions were assigned | There was no randomisation in this single-arm feasibility study |
| Implementation                   | 10  | Who generated the random allocation sequence, who enrolled participants, and who assigned participants to interventions                                                                     | There was no randomisation in this single-arm feasibility study |
| Blinding                         | 11a | If done, who was blinded after assignment to interventions (for example, participants, care providers, those assessing outcomes) and how                                                    | There was no blinding in this single-arm feasibility study      |

SUPPLEMENTARY MATERIAL

|                                                      |     |                                                                                                                                                                                       |                                                                                                                                                   |
|------------------------------------------------------|-----|---------------------------------------------------------------------------------------------------------------------------------------------------------------------------------------|---------------------------------------------------------------------------------------------------------------------------------------------------|
|                                                      | 11b | If relevant, description of the similarity of interventions                                                                                                                           | This was a single arm study                                                                                                                       |
| Statistical methods                                  | 12  | Methods used to address each pilot trial objective whether qualitative or quantitative                                                                                                | Page 14                                                                                                                                           |
| <b>Results</b>                                       |     |                                                                                                                                                                                       |                                                                                                                                                   |
| Participant flow (a diagram is strongly recommended) | 13a | For each group, the numbers of participants who were approached and/or assessed for eligibility, randomly assigned, received intended treatment, and were assessed for each objective | Page 19<br>Figure 2: CONSORT flow diagram                                                                                                         |
|                                                      | 13b | For each group, losses and exclusions after randomisation, together with reasons                                                                                                      | This was a single arm study without randomisation. The recruitment and attrition rates are included on Page 19 and Figure 2. CONSORT flow diagram |
| Recruitment                                          | 14a | Dates defining the periods of recruitment and follow-up                                                                                                                               | Page 15                                                                                                                                           |
|                                                      | 14b | Why the pilot trial ended or was stopped                                                                                                                                              | Page 15.<br>Figure 2: CONSORT flow diagram                                                                                                        |

1  
2  
3  
4  
5  
6  
7  
8  
9  
10  
11  
12  
13  
14  
15  
16  
17  
18  
19  
20  
21  
22  
23  
24  
25  
26  
27  
28  
29  
30  
31  
32  
33  
34  
35  
36  
37  
38  
39  
40  
41  
42  
43  
44  
45  
46

## SUPPLEMENTARY MATERIAL

|                         |     |                                                                                                                                                                                |                                                                  |
|-------------------------|-----|--------------------------------------------------------------------------------------------------------------------------------------------------------------------------------|------------------------------------------------------------------|
|                         |     |                                                                                                                                                                                | states T3 (follow up) was stopped due to attaining target sample |
| Baseline data           | 15  | A table showing baseline demographic and clinical characteristics for each group                                                                                               | Tables 1 and 2                                                   |
| Numbers analysed        | 16  | For each objective, number of participants (denominator) included in each analysis. If relevant, these numbers should be by randomised group                                   | Tables 3 and 4                                                   |
| Outcomes and estimation | 17  | For each objective, results including expressions of uncertainty (such as 95% confidence interval) for any estimates. If relevant, these results should be by randomised group | Tables 3 and 4                                                   |
| Ancillary analyses      | 18  | Results of any other analyses performed that could be used to inform the future definitive trial                                                                               | Pages 21-22                                                      |
| Harms                   | 19  | All important harms or unintended effects in each group (for specific guidance see CONSORT for harms)                                                                          | Page 19                                                          |
|                         | 19a | If relevant, other important unintended consequences                                                                                                                           | N/A. (Page 19 states no adverse events)                          |
| <b>Discussion</b>       |     |                                                                                                                                                                                |                                                                  |
| Limitations             | 20  | Pilot trial limitations, addressing sources of potential bias and remaining uncertainty about feasibility                                                                      | Pages 31-32                                                      |
| Generalisability        | 21  | Generalisability (applicability) of pilot trial methods and findings to future definitive trial and other studies                                                              | Page 32                                                          |
| Interpretation          | 22  | Interpretation consistent with pilot trial objectives and findings, balancing potential benefits and harms, and considering other relevant evidence                            | Pages 27-31                                                      |
|                         | 22a | Implications for progression from pilot to future definitive trial, including any proposed amendments                                                                          | 32-33                                                            |



SUPPLEMENTARY MATERIAL

|                          |    |                                                                                            |                  |
|--------------------------|----|--------------------------------------------------------------------------------------------|------------------|
| <b>Other information</b> |    |                                                                                            |                  |
| Registration             | 23 | Registration number for pilot trial and name of trial registry                             | Abstract; Page 8 |
| Protocol                 | 24 | Where the pilot trial protocol can be accessed, if available                               | Page 8           |
| Funding                  | 25 | Sources of funding and other support (such as supply of drugs), role of funders            | Page 35          |
|                          | 26 | Ethical approval or approval by research review committee, confirmed with reference number | Pages 8, 35      |

Citation: Eldridge SM, Chan CL, Campbell MJ, Bond CM, Hopewell S, Thabane L, et al. CONSORT 2010 statement: extension to randomised pilot and feasibility trials. BMJ. 2016;355.

\*We strongly recommend reading this statement in conjunction with the CONSORT 2010, extension to randomised pilot and feasibility trials, Explanation and Elaboration for important clarifications on all the items. If relevant, we also recommend reading CONSORT extensions for cluster randomised trials, non-inferiority and equivalence trials, non-pharmacological treatments, herbal interventions, and pragmatic trials. Additional extensions are forthcoming: for those and for up to date references relevant to this checklist, see [www.consort-statement.org](http://www.consort-statement.org).

1  
2  
3  
4  
5  
6  
7  
8  
9  
10  
11  
12  
13  
14  
15  
16  
17  
18  
19  
20  
21  
22  
23  
24  
25  
26  
27  
28  
29  
30  
31  
32  
33  
34  
35  
36  
37  
38  
39  
40  
41  
42  
43  
44  
45  
46

## SUPPLEMENTARY MATERIAL

**Supplementary Figure 2: Content of the rehabilitation programme****Week 1**

Introduction to the programme

Aims and concerns of the programme

Understanding chronic pain

Chronic pain/fatigue cycle

Benefits of exercise

Graded exercise (circuit exercises)

Relaxation session: Breathing exercises and Progressive Muscle Relaxation (led by a psychological wellbeing practitioner)

Goal setting (SMART goals)

**Week 2**

Goal review

Understanding pain and the emotional effects: negative thinking and unhelpful thoughts

Pacing Session 1:

Activity patterns (boom-bust, avoidance and excessive persistence)

Aims of pacing

Barriers to pacing

Using activity diaries for the week ahead

Graded exercise (circuit exercises)

Mindfulness session: Introduction to mindfulness & Body Scan (led by a psychological wellbeing practitioner)

Goal setting

**Week 3**

Goal review

Pacing Session 2:

Discuss the completed activity diaries

Facets of pacing

Stages of pacing

Dealing with difficult thoughts

## SUPPLEMENTARY MATERIAL

1  
2  
3 Graded exercise (circuit exercises)

4 Mindfulness session: Leaves on the stream (led by a psychological wellbeing  
5 practitioner)

6  
7  
8 Goal setting: specific pacing goal  
9

10  
11  
12 **Week 4**

13 Pacing goal review

14 Choice V's demand activities

15 Increasing positive thoughts

16 Work and employment

17 Graded exercise (circuit exercises)

18 Mindfulness session: Compassionate acceptance (led by a psychological wellbeing  
19 practitioner)

20 Goal setting  
21  
22  
23  
24  
25  
26  
27  
28

29 **Week 5**

30 Goal review

31 Sleep hygiene

32 Medication

33 Graded exercise (circuit exercises)

34 Mindfulness session: Treasure of pleasure (led by a psychological wellbeing  
35 practitioner)

36 Goal setting  
37  
38  
39  
40  
41  
42  
43  
44

45 **Week 6**

46 Goal review

47 Managing setbacks

48 Mindfulness session: Open Heart (led by a psychological wellbeing practitioner)

49 Maintaining progress

50 Signposting to community resources  
51  
52  
53  
54  
55  
56  
57  
58  
59  
60

## SUPPLEMENTARY MATERIAL

**Supplementary Table 2. Five themes of the 28-item Activity Pacing Questionnaire (APQ-28) with examples**

| APQ Theme            | Example of items                                                                                                                                      |
|----------------------|-------------------------------------------------------------------------------------------------------------------------------------------------------|
| Activity adjustment  | "I broke tasks up into periods of activity and rest"<br>"I alternated the type of activity that I was doing"                                          |
| Activity consistency | "I did a similar amount of activity on 'good' and 'bad' days"<br>"I made sure I did some activity every day, even if I had a "bad" day"               |
| Activity progression | "I gradually increased how long I could spend on my activities"<br>"I gradually increased activities that I had been avoiding because of my symptoms" |
| Activity planning    | "I set activity goals that were meaningful for me"<br>"I planned in advance how long I would spend on each activity"                                  |
| Activity acceptance  | "I changed my activity targets if they were unrealistic"<br>"I set activity goals that were realistic for me"                                         |
