# Supplementary material for: Testing a newly developed activity pacing framework for chronic pain/fatigue: a feasibility study
Source: PubMed Central journal article supplement — BMJ Open. 2021 Dec 8;11(12):e045398. doi: 10.1136/bmjopen-2020-045398 (PMC8655535; doi:10.1136/bmjopen-2020-045398), 2021-12-08
Supplement: bmjopen-2020-045398supp001.pdf [file bmjopen-2020-045398supp001.pdf]

## SUPPLEMENTARY MATERIAL

**Supplementary Figure 1. Content of the Activity Pacing Framework: Overview and Theory, and Appendices and Teaching Guide booklets****A. Overview and Theory**

1. Glossary
2. Introduction:
  - Why is an activity pacing framework needed?
  - How has the activity pacing framework been developed?
3. Definition of activity pacing
4. Aims of pacing
  - Examples of aims of pacing and their clinical application
5. Who can benefit from pacing?
6. Activity behaviours:
  - Avoidance behaviour/fear-avoidance
  - Over-exertion/excessive persistence
  - Boom-bust/overactivity-underactivity cycling
7. Quota-contingent and symptom-contingent pacing
8. Models of pacing:
  - Operant approach
  - Energy conservation
  - Activity pacing framework model of pacing
9. Facets of pacing:
  - Facets of pacing, broader pacing themes and individuals who may benefit
  - Facets of pacing that are not endorsed for routine use, but may be considered during a flare-up of symptoms
10. Getting started with pacing: stages of pacing
11. Potential barriers to pacing:
  - Addressing barriers
12. How pacing relates to other coping strategies
  - Pacing and graded exercise/graded activity
  - Pacing and cognitive behavioural therapy
  - Pacing and acceptance and commitment therapy
  - Pacing and mindfulness
  - Pacing and relaxation

## SUPPLEMENTARY MATERIAL

Pacing and sleep hygiene

Pacing and other strategies

13. Pacing aids

Activity diaries

Goal setting

**B. Appendices and teaching guide**

*Part 1. Conceptual model of pacing*

Appendix 1. Activity pacing and the fear-avoidance model

Appendix 2. Pacing as a health behaviour:

The Health Action Process Approach (HAPA)

The Transtheoretical model

*Part 2. Pacing guide for healthcare professionals*

Appendix 3. Chronic pain/fatigue cycle

Appendix 4. Overactivity-underactivity (boom-bust) cycle:

Boom-bust, avoidance and excessive persistence behaviours

Appendix 5. Activity pacing framework model of pacing

Appendix 6. Facets of pacing:

Facets of pacing, explanation/examples and who may benefit

Appendix 7. Stages of pacing

Appendix 8. Patient exemplars:

Avoidance

Excessive persistence

Boom-bust

Patients who are predominantly bedbound

Appendix 9. Questions for healthcare professionals to ask patients:

Exploring current patterns of activity

Exploring current baselines of activity

Exploring possible barriers to pacing

Exploring individuals' aims

*Part 3. Pacing tools*

Appendix 10. Activity diary:

## SUPPLEMENTARY MATERIAL

Blank activity diary and example of a completed diary

Appendix 11. Goal setting

Appendix 12. Checklist for health care professionals

Appendix 13. References

## SUPPLEMENTARY MATERIAL

## Supplementary Table 1. CONSORT checklist

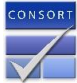

## CONSORT 2010 checklist of information to include when reporting a pilot or feasibility trial\*

| Section/Topic             | Item No | Checklist item                                                                                                                                      | Reported on page No                                                                                                                     |
|---------------------------|---------|-----------------------------------------------------------------------------------------------------------------------------------------------------|-----------------------------------------------------------------------------------------------------------------------------------------|
| <b>Title and abstract</b> |         |                                                                                                                                                     |                                                                                                                                         |
|                           | 1a      | Identification as a pilot or feasibility randomised trial in the title                                                                              | Title page<br>(Page 1)                                                                                                                  |
|                           | 1b      | Structured summary of pilot trial design, methods, results, and conclusions (for specific guidance see CONSORT abstract extension for pilot trials) | The abstract is structured as per the <i>BMJ Open</i> format, but it contains the information as per the CONSORT checklist.<br>(Page 3) |
| <b>Introduction</b>       |         |                                                                                                                                                     |                                                                                                                                         |
| Background and objectives | 2a      | Scientific background and explanation of rationale for future definitive trial, and reasons for randomised pilot trial                              | Pages 5-7                                                                                                                               |
|                           | 2b      | Specific objectives or research questions for pilot trial                                                                                           | Page 7                                                                                                                                  |

## SUPPLEMENTARY MATERIAL

| <b>Methods</b> |    |                                                                                                                                                              |                                                                                                                                          |
|----------------|----|--------------------------------------------------------------------------------------------------------------------------------------------------------------|------------------------------------------------------------------------------------------------------------------------------------------|
| Trial design   | 3a | Description of pilot trial design (such as parallel, factorial) including allocation ratio                                                                   | Page 8                                                                                                                                   |
|                | 3b | Important changes to methods after pilot trial commencement (such as eligibility criteria), with reasons                                                     | This was not a pilot trial that ran into a RCT. Any suggested modifications following this feasibility study are included on Pages 32-33 |
| Participants   | 4a | Eligibility criteria for participants                                                                                                                        | Page 9                                                                                                                                   |
|                | 4b | Settings and locations where the data were collected                                                                                                         | Page 11                                                                                                                                  |
|                | 4c | How participants were identified and consented                                                                                                               | Page 8                                                                                                                                   |
| Interventions  | 5  | The interventions for each group with sufficient details to allow replication, including how and when they were actually administered                        | Pages 9-11 and Supplementary Figures 1-2                                                                                                 |
| Outcomes       | 6a | Completely defined prespecified assessments or measurements to address each pilot trial objective specified in 2b, including how and when they were assessed | Pages 11-14                                                                                                                              |
|                | 6b | Any changes to pilot trial assessments or measurements after the pilot trial commenced, with reasons                                                         | This was not a pilot trial that ran into a RCT. Any suggested                                                                            |

## SUPPLEMENTARY MATERIAL

|             |    |                                                                                                             |                                                                                                                                     |
|-------------|----|-------------------------------------------------------------------------------------------------------------|-------------------------------------------------------------------------------------------------------------------------------------|
|             |    |                                                                                                             | modifications following this feasibility study are included on Pages 32-33                                                          |
|             | 6c | If applicable, prespecified criteria used to judge whether, or how, to proceed with future definitive trial | N/A. This was not a pilot trial that ran into a RCT. There were no prespecified criteria in this single-arm feasibility study       |
| Sample size | 7a | Rationale for numbers in the pilot trial                                                                    | Page 9                                                                                                                              |
|             | 7b | When applicable, explanation of any interim analyses and stopping guidelines                                | This was not a pilot trial that ran into a RCT. No interim analyses or stopping guidelines were included in this feasibility study. |

## SUPPLEMENTARY MATERIAL

|                                  |     |                                                                                                                                                                                             |                                                                 |
|----------------------------------|-----|---------------------------------------------------------------------------------------------------------------------------------------------------------------------------------------------|-----------------------------------------------------------------|
| Randomisation:                   |     |                                                                                                                                                                                             |                                                                 |
| Sequence generation              | 8a  | Method used to generate the random allocation sequence                                                                                                                                      | There was no randomisation in this single-arm feasibility study |
|                                  | 8b  | Type of randomisation(s); details of any restriction (such as blocking and block size)                                                                                                      | There was no randomisation in this single-arm feasibility study |
| Allocation concealment mechanism | 9   | Mechanism used to implement the random allocation sequence (such as sequentially numbered containers), describing any steps taken to conceal the sequence until interventions were assigned | There was no randomisation in this single-arm feasibility study |
| Implementation                   | 10  | Who generated the random allocation sequence, who enrolled participants, and who assigned participants to interventions                                                                     | There was no randomisation in this single-arm feasibility study |
| Blinding                         | 11a | If done, who was blinded after assignment to interventions (for example, participants, care providers, those assessing outcomes) and how                                                    | There was no blinding in this single-arm feasibility study      |

## SUPPLEMENTARY MATERIAL

|                                                      |     |                                                                                                                                                                                       |                                                                                                                                                   |
|------------------------------------------------------|-----|---------------------------------------------------------------------------------------------------------------------------------------------------------------------------------------|---------------------------------------------------------------------------------------------------------------------------------------------------|
|                                                      | 11b | If relevant, description of the similarity of interventions                                                                                                                           | This was a single arm study                                                                                                                       |
| Statistical methods                                  | 12  | Methods used to address each pilot trial objective whether qualitative or quantitative                                                                                                | Page 14                                                                                                                                           |
| <b>Results</b>                                       |     |                                                                                                                                                                                       |                                                                                                                                                   |
| Participant flow (a diagram is strongly recommended) | 13a | For each group, the numbers of participants who were approached and/or assessed for eligibility, randomly assigned, received intended treatment, and were assessed for each objective | Page 19<br>Figure 2:<br>CONSORT flow diagram                                                                                                      |
|                                                      | 13b | For each group, losses and exclusions after randomisation, together with reasons                                                                                                      | This was a single arm study without randomisation. The recruitment and attrition rates are included on Page 19 and Figure 2. CONSORT flow diagram |
| Recruitment                                          | 14a | Dates defining the periods of recruitment and follow-up                                                                                                                               | Page 15                                                                                                                                           |
|                                                      | 14b | Why the pilot trial ended or was stopped                                                                                                                                              | Page 15.<br>Figure 2:<br>CONSORT flow diagram                                                                                                     |



## SUPPLEMENTARY MATERIAL

|                         |     |                                                                                                                                                                                |                                                                  |
|-------------------------|-----|--------------------------------------------------------------------------------------------------------------------------------------------------------------------------------|------------------------------------------------------------------|
|                         |     |                                                                                                                                                                                | states T3 (follow up) was stopped due to attaining target sample |
| Baseline data           | 15  | A table showing baseline demographic and clinical characteristics for each group                                                                                               | Tables 1 and 2                                                   |
| Numbers analysed        | 16  | For each objective, number of participants (denominator) included in each analysis. If relevant, these numbers should be by randomised group                                   | Tables 3 and 4                                                   |
| Outcomes and estimation | 17  | For each objective, results including expressions of uncertainty (such as 95% confidence interval) for any estimates. If relevant, these results should be by randomised group | Tables 3 and 4                                                   |
| Ancillary analyses      | 18  | Results of any other analyses performed that could be used to inform the future definitive trial                                                                               | Pages 21-22                                                      |
| Harms                   | 19  | All important harms or unintended effects in each group (for specific guidance see CONSORT for harms)                                                                          | Page 19                                                          |
|                         | 19a | If relevant, other important unintended consequences                                                                                                                           | N/A. (Page 19 states no adverse events)                          |
| <b>Discussion</b>       |     |                                                                                                                                                                                |                                                                  |
| Limitations             | 20  | Pilot trial limitations, addressing sources of potential bias and remaining uncertainty about feasibility                                                                      | Pages 31-32                                                      |
| Generalisability        | 21  | Generalisability (applicability) of pilot trial methods and findings to future definitive trial and other studies                                                              | Page 32                                                          |
| Interpretation          | 22  | Interpretation consistent with pilot trial objectives and findings, balancing potential benefits and harms, and considering other relevant evidence                            | Pages 27-31                                                      |
|                         | 22a | Implications for progression from pilot to future definitive trial, including any proposed amendments                                                                          | 32-33                                                            |

## SUPPLEMENTARY MATERIAL

| Other information |    |                                                                                            |                  |
|-------------------|----|--------------------------------------------------------------------------------------------|------------------|
| Registration      | 23 | Registration number for pilot trial and name of trial registry                             | Abstract; Page 8 |
| Protocol          | 24 | Where the pilot trial protocol can be accessed, if available                               | Page 8           |
| Funding           | 25 | Sources of funding and other support (such as supply of drugs), role of funders            | Page 35          |
|                   | 26 | Ethical approval or approval by research review committee, confirmed with reference number | Pages 8, 35      |

Citation: Eldridge SM, Chan CL, Campbell MJ, Bond CM, Hopewell S, Thabane L, et al. CONSORT 2010 statement: extension to randomised pilot and feasibility trials. *BMJ*. 2016;355.

\*We strongly recommend reading this statement in conjunction with the CONSORT 2010, extension to randomised pilot and feasibility trials, Explanation and Elaboration for important clarifications on all the items. If relevant, we also recommend reading CONSORT extensions for cluster randomised trials, non-inferiority and equivalence trials, non-pharmacological treatments, herbal interventions, and pragmatic trials. Additional extensions are forthcoming: for those and for up to date references relevant to this checklist, see [www.consort-statement.org](http://www.consort-statement.org).

## SUPPLEMENTARY MATERIAL

**Supplementary Figure 2: Content of the rehabilitation programme****Week 1**

Introduction to the programme  
Aims and concerns of the programme  
Understanding chronic pain  
Chronic pain/fatigue cycle  
Benefits of exercise  
Graded exercise (circuit exercises)  
Relaxation session: Breathing exercises and Progressive Muscle Relaxation (led by a psychological wellbeing practitioner)  
Goal setting (SMART goals)

**Week 2**

Goal review  
Understanding pain and the emotional effects: negative thinking and unhelpful thoughts  
Pacing Session 1:  
    Activity patterns (boom-bust, avoidance and excessive persistence)  
    Aims of pacing  
    Barriers to pacing  
    Using activity diaries for the week ahead  
Graded exercise (circuit exercises)  
Mindfulness session: Introduction to mindfulness & Body Scan (led by a psychological wellbeing practitioner)  
Goal setting

**Week 3**

Goal review  
Pacing Session 2:  
    Discuss the completed activity diaries  
    Facets of pacing  
    Stages of pacing  
Dealing with difficult thoughts

## SUPPLEMENTARY MATERIAL

Graded exercise (circuit exercises)

Mindfulness session: Leaves on the stream (led by a psychological wellbeing practitioner)

Goal setting: specific pacing goal

**Week 4**

Pacing goal review

Choice V's demand activities

Increasing positive thoughts

Work and employment

Graded exercise (circuit exercises)

Mindfulness session: Compassionate acceptance (led by a psychological wellbeing practitioner)

Goal setting

**Week 5**

Goal review

Sleep hygiene

Medication

Graded exercise (circuit exercises)

Mindfulness session: Treasure of pleasure (led by a psychological wellbeing practitioner)

Goal setting

**Week 6**

Goal review

Managing setbacks

Mindfulness session: Open Heart (led by a psychological wellbeing practitioner)

Maintaining progress

Signposting to community resources

## SUPPLEMENTARY MATERIAL

**Supplementary Table 2. Five themes of the 28-item Activity Pacing Questionnaire (APQ-28) with examples**

| <b>APQ Theme</b>     | <b>Example of items</b>                                                                                                                               |
|----------------------|-------------------------------------------------------------------------------------------------------------------------------------------------------|
| Activity adjustment  | “I broke tasks up into periods of activity and rest”<br>“I alternated the type of activity that I was doing”                                          |
| Activity consistency | “I did a similar amount of activity on ‘good’ and ‘bad’ days”<br>“I made sure I did some activity every day, even if I had a “bad” day”               |
| Activity progression | “I gradually increased how long I could spend on my activities”<br>“I gradually increased activities that I had been avoiding because of my symptoms” |
| Activity planning    | “I set activity goals that were meaningful for me”<br>“I planned in advance how long I would spend on each activity”                                  |
| Activity acceptance  | “I changed my activity targets if they were unrealistic”<br>“I set activity goals that were realistic for me”                                         |
